# Supplementary material for: IGF2BP3 is a key regulator for the abundance of t(4;11) fusion mRNA and protein
Source: Research Square preprint supplement (doi:10.21203/rs.3.rs-8602907/v1), 2026-01-21
Supplement: Supplementary file 1 [file 3c42136d3188e0725c93a3b1.xlsx]

## Sheet: Tabelle1
Gene_ID	Gene	Gene_Name	mean_Mock	mean_t(4;11)	mean_RIP	log2_t(4;11) vs Mock	pvalue_t(4;11) vs Mock	log2_RIP vs Mock	pvalue_RIP vs Mock	log2_RIP vs t(4;11)	pvalue_RIP vs t(4;11)
ENSG00000124608	AARS2	alanyl-tRNA synthetase 2, mitochondrial [Source:HGNC Symbol;Acc:HGNC:21022]	67.6667	97.6667	675.667	0.111075	0.73211	2.62249	3.66309e-19	2.58343	1.35943e-89
ENSG00000157426	AASDH	aminoadipate-semialdehyde dehydrogenase [Source:HGNC Symbol;Acc:HGNC:23993]	30.6667	54.6667	293.667	0.335544	0.33787	2.48533	2.39711e-17	2.22385	5.46317e-37
ENSG00000181409	AATK	apoptosis associated tyrosine kinase [Source:HGNC Symbol;Acc:HGNC:21]	5	12.3333	119.667	0.235581	0.769555	3.5189	2.07404e-09	3.0745	8.9768e-23
ENSG00000107331	ABCA2	ATP binding cassette subfamily A member 2 [Source:HGNC Symbol;Acc:HGNC:32]	23.3333	49.3333	285.667	0.59094	0.129821	2.83058	1.54473e-20	2.32588	2.41722e-38
ENSG00000154265	ABCA5	ATP binding cassette subfamily A member 5 [Source:HGNC Symbol;Acc:HGNC:35]	26.3333	53	344.667	0.57393	0.173279	2.96635	1.17437e-19	2.49479	9.32081e-47
ENSG00000064687	ABCA7	ATP binding cassette subfamily A member 7 [Source:HGNC Symbol;Acc:HGNC:37]	14	28	390.667	-0.120478	0.844381	3.62635	5.31953e-14	3.59582	2.76011e-68
ENSG00000085563	ABCB1	ATP binding cassette subfamily B member 1 [Source:HGNC Symbol;Acc:HGNC:40]	1.66667	12.6667	19	2.33501	0.0142615	2.68744	0.00230244	0.390421	0.428903
ENSG00000135776	ABCB10	ATP binding cassette subfamily B member 10 [Source:HGNC Symbol;Acc:HGNC:41]	78.6667	195.333	148.333	0.815802	0.0015424	0.167869	0.543262	-0.601566	7.69982e-05
ENSG00000114770	ABCC5	ATP binding cassette subfamily C member 5 [Source:HGNC Symbol;Acc:HGNC:56]	44.3333	52	413.667	-0.367233	0.274311	2.37516	1.56116e-18	2.78735	8.39003e-61
ENSG00000091262	ABCC6	ATP binding cassette subfamily C member 6 [Source:HGNC Symbol;Acc:HGNC:57]	3.33333	6.33333	36.6667	0.451946	0.642435	2.68809	6.92252e-05	2.33671	1.8356e-06
ENSG00000101986	ABCD1	ATP binding cassette subfamily D member 1 [Source:HGNC Symbol;Acc:HGNC:61]	3.33333	9.33333	51.6667	1.02872	0.245996	3.16074	1.89307e-07	2.26046	1.443e-08
ENSG00000033050	ABCF2	ATP binding cassette subfamily F member 2 [Source:HGNC Symbol;Acc:HGNC:71]	151.333	199	1345.67	-0.133144	0.539909	2.36954	5.28899e-33	2.5521	1.76983e-146
ENSG00000168792	ABHD15	abhydrolase domain containing 15 [Source:HGNC Symbol;Acc:HGNC:26971]	10.6667	16.6667	83.6667	0.105312	0.854294	2.154	4.01997e-06	2.11366	5.13389e-11
ENSG00000226981	ABHD17AP6	ABHD17A pseudogene 6 [Source:HGNC Symbol;Acc:HGNC:34044]	3.33333	0	1	-4.52142	0.0196869	-2.40006	0.108038
ENSG00000097007	ABL1	ABL proto-oncogene 1, non-receptor tyrosine kinase [Source:HGNC Symbol;Acc:HGNC:76]	55	77.6667	410.667	0.0783194	0.823142	2.19467	1.01292e-12	2.19739	1.66278e-49
ENSG00000143322	ABL2	ABL proto-oncogene 2, non-receptor tyrosine kinase [Source:HGNC Symbol;Acc:HGNC:77]	48.3333	66.3333	332.333	-0.267376	0.456207	1.86997	2.27619e-11	2.12298	3.18483e-37
ENSG00000146386	ABRACL	ABRA C-terminal like [Source:HGNC Symbol;Acc:HGNC:21230]	179.667	363.667	72.3333	0.482559	0.0181327	-2.08999	5.60045e-17	-2.53228	1.8408e-60
ENSG00000166016	ABTB2	ankyrin repeat and BTB domain containing 2 [Source:HGNC Symbol;Acc:HGNC:23842]	10.6667	15	86.3333	0.0937896	0.886437	2.27152	3.68038e-07	2.31981	2.28878e-13
ENSG00000257658	AC004217.2	DnaJ (Hsp40) homolog, subfamily C, member 2 (DNAJC2) pseudogene	4.66667	8.66667	135	0.427939	0.595929	4.05504	4.57015e-16	3.75356	9.90966e-28
ENSG00000214870	AC004540.1	novel transcript	1.66667	10.3333	3	2.1268	0.0297907	0.0724084	0.954702	-1.999	0.00874368
ENSG00000242951	AC007182.2	ribosomal protein S24 (RPS24) pseudogene	1494.33	1978	10530	0.14029	0.66605	2.2968	8.88237e-10	2.20685	4.4091e-247
ENSG00000259972	AC009120.2	novel transcript, antisense to PSMD7	3.66667	4.33333	56.3333	-0.200796	0.849343	3.14473	1.08663e-07	3.49841	1.44404e-12
ENSG00000270804	AC010326.4	ubiquitin-conjugating enzyme E2C (UBE2C) pseudogene	3.33333	4	39.3333	-0.391092	0.729386	2.72322	2.59169e-05	3.08833	1.92599e-08
ENSG00000276853	AC026124.2	novel transcript, sense intronic to LEMD3	3.66667	4.66667	38	-0.301951	0.750842	2.51651	4.87732e-05	2.82247	4.25331e-08
ENSG00000271781	AC026740.1	novel transcript, antisense to TPPP	6.33333	11.6667	310	0.327385	0.620781	4.7927	2.38051e-31	4.52621	1.08949e-58
ENSG00000280002	AC078925.4	novel transcript	16	0	0	-7.25317	3.97063e-08	-7.47508	1.28255e-08
ENSG00000226338	AC079150.1	pseudogene similar to part of phospholipase C, gamma 1 PLCG1	13.3333	21.3333	205.667	0.119295	0.819338	3.13477	9.31101e-20	3.06639	8.58441e-36
ENSG00000276148	AC084824.5	novel transcript, antisense to DNM1L	6.66667	7.33333	41.3333	-0.452225	0.580253	1.80087	0.000906374	2.29439	4.80591e-07
ENSG00000247134	AC090204.1	novel transcript	18.6667	3.33333	0	-2.91203	6.6508e-05	-7.31708	5.76047e-08	-4.37631	0.00838
ENSG00000272763	AC103702.2	novel transcript	4	16.6667	7	1.57544	0.0274421	0.104698	0.912395	-1.45453	0.00905724
ENSG00000253414	AC124067.2	novel transcript	2	25	7	3.10661	0.000133902	1.07819	0.325288	-2.02542	7.89932e-05
ENSG00000275185	AC130324.3	novel transcript, antisense to TEFM	11	15	114	-0.0649657	0.909785	2.57219	3.60879e-10	2.72311	5.36686e-20
ENSG00000183889	AC138969.1	novel member of the nuclear pore complex interacting protein NPIP gene family	6	6.66667	152.667	-0.29059	0.722805	3.87466	1.18252e-17	4.31328	2.29813e-31
ENSG00000226141	AC244107.1	similar to sodium- and chloride-dependent creatine transporter (FLJ43855) pseudogene	12	39	183.667	1.25209	0.01276	3.17668	5.95456e-16	2.03235	8.01616e-23
ENSG00000278540	ACACA	acetyl-CoA carboxylase alpha [Source:HGNC Symbol;Acc:HGNC:84]	34.3333	53.6667	316	0.068101	0.849245	2.37382	7.54291e-17	2.3526	4.17882e-44
ENSG00000076555	ACACB	acetyl-CoA carboxylase beta [Source:HGNC Symbol;Acc:HGNC:85]	16	21	250	-0.0898568	0.856432	3.1801	5.27632e-21	3.36823	4.4487e-47
ENSG00000111271	ACAD10	acyl-CoA dehydrogenase family member 10 [Source:HGNC Symbol;Acc:HGNC:21597]	21.3333	33	300.333	0.172119	0.724211	3.05825	6.46165e-17	2.97667	1.23583e-48
ENSG00000115361	ACADL	acyl-CoA dehydrogenase long chain [Source:HGNC Symbol;Acc:HGNC:88]	1	10.3333	31	2.73814	0.0108456	4.0445	7.95159e-06	1.37487	0.00163327
ENSG00000131584	ACAP3	ArfGAP with coiled-coil, ankyrin repeat and PH domains 3 [Source:HGNC Symbol;Acc:HGNC:16754]	27	41.3333	289	-0.0654997	0.87733	2.52881	6.23854e-14	2.60477	5.43973e-41
ENSG00000120437	ACAT2	acetyl-CoA acetyltransferase 2 [Source:HGNC Symbol;Acc:HGNC:94]	166.667	338.667	153.333	0.623758	0.0218063	-0.765625	0.0141643	-1.35091	2.34078e-24
ENSG00000100813	ACIN1	apoptotic chromatin condensation inducer 1 [Source:HGNC Symbol;Acc:HGNC:17066]	252	259.333	2729.33	-0.670157	0.0131009	2.51955	2.40449e-31	3.18809	1.94107e-295
ENSG00000072110	ACTN1	actinin alpha 1 [Source:HGNC Symbol;Acc:HGNC:163]	97	144.333	747	-0.0106412	0.966617	2.11689	3.12788e-22	2.16574	1.03177e-64
ENSG00000077522	ACTN2	actinin alpha 2 [Source:HGNC Symbol;Acc:HGNC:164]	6.33333	19.6667	208	1.05551	0.0895667	4.21285	2.96928e-23	3.2004	3.20596e-38
ENSG00000073670	ADAM11	ADAM metallopeptidase domain 11 [Source:HGNC Symbol;Acc:HGNC:189]	24.6667	41	283.667	0.224285	0.589863	2.7449	2.4209e-16	2.58477	1.37133e-41
ENSG00000151651	ADAM8	ADAM metallopeptidase domain 8 [Source:HGNC Symbol;Acc:HGNC:215]	4.66667	8	47	0.338996	0.683855	2.55307	8.19944e-06	2.34784	2.54568e-08
ENSG00000160323	ADAMTS13	ADAM metallopeptidase with thrombospondin type 1 motif 13 [Source:HGNC Symbol;Acc:HGNC:1366]	9.33333	20.3333	157.667	0.708995	0.272929	3.31275	1.47784e-14	2.74457	1.16732e-24
ENSG00000087116	ADAMTS2	ADAM metallopeptidase with thrombospondin type 1 motif 2 [Source:HGNC Symbol;Acc:HGNC:218]	4.33333	8.33333	63.6667	0.330566	0.673097	3.03751	4.81387e-08	2.73539	4.46578e-12
ENSG00000197381	ADARB1	adenosine deaminase RNA specific B1 [Source:HGNC Symbol;Acc:HGNC:226]	24.3333	34.6667	267	0.0173344	0.970183	2.67686	1.20629e-12	2.73775	9.23916e-43
ENSG00000138031	ADCY3	adenylate cyclase 3 [Source:HGNC Symbol;Acc:HGNC:234]	71	88	474.667	-0.138004	0.651947	2.0118	8.13546e-14	2.22381	1.21656e-57
ENSG00000174233	ADCY6	adenylate cyclase 6 [Source:HGNC Symbol;Acc:HGNC:237]	47.3333	55.3333	419.667	-0.269463	0.465525	2.39477	1.50863e-14	2.717	9.27631e-48
ENSG00000162104	ADCY9	adenylate cyclase 9 [Source:HGNC Symbol;Acc:HGNC:240]	27.6667	36.3333	181.667	-0.0522187	0.902856	1.95112	1.17458e-09	2.11181	5.7379e-23
ENSG00000020181	ADGRA2	adhesion G protein-coupled receptor A2 [Source:HGNC Symbol;Acc:HGNC:17849]	13	21	125	0.279494	0.630513	2.51408	1.60727e-09	2.36801	3.17233e-19
ENSG00000152990	ADGRA3	adhesion G protein-coupled receptor A3 [Source:HGNC Symbol;Acc:HGNC:13839]	27	34.3333	177.333	-0.187004	0.621603	1.90498	3.21248e-10	2.15906	1.98317e-23
ENSG00000181790	ADGRB1	adhesion G protein-coupled receptor B1 [Source:HGNC Symbol;Acc:HGNC:943]	11.3333	33	97.3333	1.03297	0.0320575	2.30847	5.51717e-09	1.35392	5.7609e-08
ENSG00000072071	ADGRL1	adhesion G protein-coupled receptor L1 [Source:HGNC Symbol;Acc:HGNC:20973]	35.6667	52	298.667	0.152517	0.709585	2.37583	2.1633e-11	2.31419	8.85367e-39
ENSG00000150471	ADGRL3	adhesion G protein-coupled receptor L3 [Source:HGNC Symbol;Acc:HGNC:20974]	1.33333	36.6667	32	4.19857	6.73057e-07	3.75208	1.34911e-05	-0.398063	0.213573
ENSG00000164199	ADGRV1	adhesion G protein-coupled receptor V1 [Source:HGNC Symbol;Acc:HGNC:17416]	12.3333	22	136	0.299357	0.546931	2.64716	3.04742e-13	2.42285	2.52139e-21
ENSG00000148926	ADM	adrenomedullin [Source:HGNC Symbol;Acc:HGNC:259]	10.6667	30.3333	49.6667	0.984217	0.0547455	1.42549	0.0014509	0.511626	0.0924349
ENSG00000130396	AFDN	afadin, adherens junction formation factor [Source:HGNC Symbol;Acc:HGNC:7137]	93.3333	159.667	1064.33	0.105595	0.71342	2.62336	6.84139e-30	2.53188	1.31845e-120
ENSG00000172493	AFF1	AF4/FMR2 family member 1 [Source:HGNC Symbol;Acc:HGNC:7135]	17.6667	55.3333	473.333	1.21452	0.00736659	3.99426	3.51942e-30	2.89201	2.04917e-75
ENSG00000223959	AFG3L1P	AFG3 like matrix AAA peptidase subunit 1, pseudogene [Source:HGNC Symbol;Acc:HGNC:314]	36	48.6667	341.667	-0.0417125	0.908743	2.48586	5.45209e-18	2.60725	9.45587e-51
ENSG00000265018	AGAP12P	ArfGAP with GTPase domain, ankyrin repeat and PH domain 12, pseudogene [Source:HGNC Symbol;Acc:HGNC:23661]	3.66667	4	156.667	-0.302933	0.764683	4.61815	3.86933e-18	5.08717	8.26925e-29
ENSG00000135439	AGAP2	ArfGAP with GTPase domain, ankyrin repeat and PH domain 2 [Source:HGNC Symbol;Acc:HGNC:16921]	5	15	100	1.11863	0.111394	3.53799	2.72953e-11	2.52669	6.54343e-16
ENSG00000133612	AGAP3	ArfGAP with GTPase domain, ankyrin repeat and PH domain 3 [Source:HGNC Symbol;Acc:HGNC:16923]	185	233.333	1233.67	-0.179334	0.437491	1.97255	5.3983e-22	2.19644	3.6332e-88
ENSG00000188234	AGAP4	ArfGAP with GTPase domain, ankyrin repeat and PH domain 4 [Source:HGNC Symbol;Acc:HGNC:23459]	8.33333	11.6667	281.667	-0.0217429	0.974595	4.26444	2.43376e-29	4.38647	6.64693e-54
ENSG00000146856	AGBL3	ATP/GTP binding protein like 3 [Source:HGNC Symbol;Acc:HGNC:27981]	3.33333	14	3.33333	1.62411	0.0455346	-0.699919	0.527172	-2.29351	0.000992872
ENSG00000126070	AGO3	argonaute RISC catalytic component 3 [Source:HGNC Symbol;Acc:HGNC:18421]	24	25.6667	192.333	-0.419611	0.309872	2.20903	1.5978e-12	2.70304	2.00464e-31
ENSG00000134698	AGO4	argonaute RISC component 4 [Source:HGNC Symbol;Acc:HGNC:18424]	18	24	169.333	-0.0489391	0.918291	2.46305	2.52864e-12	2.61533	6.81641e-28
ENSG00000126705	AHDC1	AT-hook DNA binding motif containing 1 [Source:HGNC Symbol;Acc:HGNC:25230]	5.33333	11	168.667	0.388332	0.574769	4.12932	7.24033e-19	3.73049	4.10475e-34
ENSG00000135541	AHI1	Abelson helper integration site 1 [Source:HGNC Symbol;Acc:HGNC:21575]	34.6667	54.3333	660.667	0.29601	0.522114	3.59376	2.44202e-22	3.40281	7.33751e-104
ENSG00000124942	AHNAK	AHNAK nucleoprotein [Source:HGNC Symbol;Acc:HGNC:347]	19.3333	26	240.667	-0.00169076	0.997388	2.86826	3.66727e-17	3.00312	1.15196e-39
ENSG00000106546	AHR	aryl hydrocarbon receptor [Source:HGNC Symbol;Acc:HGNC:348]	2	22.6667	18.6667	2.89335	0.000507859	2.34008	0.00713917	-0.481757	0.224702
ENSG00000173209	AHSA2P	activator of HSP90 ATPase homolog 2, pseudogene [Source:HGNC Symbol;Acc:HGNC:20437]	27.6667	54	442.667	0.467189	0.195287	3.21353	5.4133e-30	2.83081	1.91279e-68
ENSG00000108599	AKAP10	A-kinase anchoring protein 10 [Source:HGNC Symbol;Acc:HGNC:368]	29.3333	39.3333	202.333	-0.106993	0.777879	1.98188	9.59216e-12	2.1581	5.70069e-26
ENSG00000170776	AKAP13	A-kinase anchoring protein 13 [Source:HGNC Symbol;Acc:HGNC:371]	25	42	330	0.0146286	0.973485	2.8275	2.37821e-19	2.7736	6.98813e-48
ENSG00000197976	AKAP17A	A-kinase anchoring protein 17A [Source:HGNC Symbol;Acc:HGNC:18783]	38.6667	50.6667	286	-0.0888014	0.801359	2.12913	4.29178e-13	2.29277	1.26685e-38
ENSG00000011243	AKAP8L	A-kinase anchoring protein 8 like [Source:HGNC Symbol;Acc:HGNC:29857]	155	158.333	1145	-0.564491	0.0274745	2.06206	7.43792e-22	2.65027	5.50027e-31
ENSG00000127914	AKAP9	A-kinase anchoring protein 9 [Source:HGNC Symbol;Acc:HGNC:379]	34.3333	51.3333	554.333	-0.00427823	0.989943	3.17535	6.23497e-36	3.22601	6.54489e-94
ENSG00000106948	AKNA	AT-hook transcription factor [Source:HGNC Symbol;Acc:HGNC:24108]	36.3333	100.333	122.667	0.873668	0.00694445	0.908215	0.00297861	0.0843709	0.649288
ENSG00000272669	AL021707.6	novel transcript, antisense to SUN2	8.66667	20	544	0.578357	0.32969	5.1337	5.99965e-44	4.56184	2.03413e-97
ENSG00000278948	AL031587.5	TEC	3.66667	8.66667	56.6667	0.749576	0.396709	3.15576	3.82692e-07	2.51011	3.81702e-10
ENSG00000275632	AL035461.2	novel transcript	8.66667	21.6667	319.667	0.779637	0.158328	4.38892	2.30515e-29	3.67548	1.36469e-56
ENSG00000269958	AL049840.5	novel transcript, sense intronic to KLC1	16.3333	35.6667	373.667	0.522948	0.27317	3.6748	3.02834e-25	3.18744	1.46188e-63
ENSG00000241255	AL136126.1	ribosomal protein S24 (RPS24) pseudogene	44.6667	57.6667	468	-0.0412342	0.915283	2.66299	4.01126e-18	2.80918	2.45879e-63
ENSG00000271992	AL354872.1	novel transcript	10.6667	31	6.33333	1.0889	0.0414357	-1.38101	0.082655	-2.4897	3.63875e-07
ENSG00000273373	AL355488.1	novel transcript, antisense to SLC16A4	6.33333	7	335.667	-0.63147	0.397853	4.84771	6.67749e-29	5.37632	6.96541e-56
ENSG00000227034	AL445433.1	ribosomal protein L5 (RPL5) pseudogene	78	82.3333	459	-0.298294	0.399284	1.89917	4.10398e-09	2.27491	9.83958e-52
ENSG00000233461	AL445524.1	novel transcript	83	126.333	668.333	-0.14408	0.656992	2.07319	9.68196e-16	2.19812	3.44599e-59
ENSG00000223583	AL513365.1	ribosomal protein L17 (RPL17) pseudogene	6.33333	8.66667	65.6667	0.0276578	0.973341	2.61601	5.78767e-07	2.71812	2.98899e-12
ENSG00000260400	AL513534.2	novel transcript, overlapping to TET1	20	27.6667	226.667	-0.0555379	0.898313	2.69813	1.08175e-16	2.82624	2.43573e-38
ENSG00000242861	AL591895.1	novel transcript	8	9.66667	114	-0.15408	0.831944	3.05164	5.03724e-12	3.35256	2.33402e-23
ENSG00000170017	ALCAM	activated leukocyte cell adhesion molecule [Source:HGNC Symbol;Acc:HGNC:400]	45.3333	109.333	140.667	0.669435	0.0296231	0.778216	0.0112218	0.156895	0.38048
ENSG00000136010	ALDH1L2	aldehyde dehydrogenase 1 family member L2 [Source:HGNC Symbol;Acc:HGNC:26777]	49	115.667	109.333	0.812669	0.0261566	0.490654	0.187119	-0.27793	0.16488
ENSG00000116127	ALMS1	ALMS1 centrosome and basal body associated protein [Source:HGNC Symbol;Acc:HGNC:428]	15.3333	15.6667	123.333	-0.4324	0.411243	2.22875	1.2414e-09	2.76863	2.10702e-22
ENSG00000073331	ALPK1	alpha kinase 1 [Source:HGNC Symbol;Acc:HGNC:20917]	5.66667	10	79.6667	0.247874	0.734725	2.98405	1.57752e-09	2.79105	8.54456e-15
ENSG00000104899	AMH	anti-Mullerian hormone [Source:HGNC Symbol;Acc:HGNC:464]	11	22	133	0.401835	0.460436	2.76745	4.70299e-12	2.40028	1.55225e-18
ENSG00000116337	AMPD2	adenosine monophosphate deaminase 2 [Source:HGNC Symbol;Acc:HGNC:469]	47	71.6667	361.333	0.120849	0.716725	2.18679	1.74189e-14	2.13357	2.22429e-40
ENSG00000185722	ANKFY1	ankyrin repeat and FYVE domain containing 1 [Source:HGNC Symbol;Acc:HGNC:20763]	73	93.6667	525	-0.106261	0.732868	2.09365	2.48082e-15	2.27751	3.7815e-62
ENSG00000001629	ANKIB1	ankyrin repeat and IBR domain containing 1 [Source:HGNC Symbol;Acc:HGNC:22215]	13.3333	19.6667	150.667	0.0334156	0.952996	2.70162	2.17586e-12	2.73241	3.23008e-25
ENSG00000176915	ANKLE2	ankyrin repeat and LEM domain containing 2 [Source:HGNC Symbol;Acc:HGNC:29101]	127.333	160	1093.33	-0.232399	0.319728	2.2929	1.35683e-29	2.56744	4.34241e-119
ENSG00000172932	ANKRD13D	ankyrin repeat domain 13D [Source:HGNC Symbol;Acc:HGNC:27880]	28	35	229.333	-0.2946	0.457984	2.17676	3.31573e-12	2.50496	4.03657e-33
ENSG00000132466	ANKRD17	ankyrin repeat domain 17 [Source:HGNC Symbol;Acc:HGNC:23575]	162.667	192.333	990.333	-0.97581	0.0343777	1.25343	0.00321906	2.16064	1.11048e-89
ENSG00000180071	ANKRD18A	ankyrin repeat domain 18A [Source:HGNC Symbol;Acc:HGNC:23643]	10.3333	20.3333	476	0.359299	0.503314	4.68334	7.26712e-39	4.34303	2.28779e-85
ENSG00000230453	ANKRD18B	ankyrin repeat domain 18B [Source:HGNC Symbol;Acc:HGNC:23644]	21.3333	22.6667	288	-0.472229	0.278245	2.92647	3.66061e-22	3.45764	9.48e-53
ENSG00000107890	ANKRD26	ankyrin repeat domain 26 [Source:HGNC Symbol;Acc:HGNC:29186]	21.6667	41	311.333	0.398979	0.319726	3.03363	1.5897e-25	2.71727	1.46433e-49
ENSG00000135976	ANKRD36	ankyrin repeat domain 36 [Source:HGNC Symbol;Acc:HGNC:24079]	5.66667	10.6667	206.667	0.481306	0.519688	4.39241	1.33062e-22	4.06852	1.1523e-41
ENSG00000174501	ANKRD36C	ankyrin repeat domain 36C [Source:HGNC Symbol;Acc:HGNC:32946]	5.33333	9.66667	214.333	0.180658	0.807239	4.47581	4.79234e-23	4.2637	9.79558e-43
ENSG00000139645	ANKRD52	ankyrin repeat domain 52 [Source:HGNC Symbol;Acc:HGNC:26614]	57.6667	68	472	-0.286371	0.361398	2.22991	3.25521e-18	2.58396	1.66111e-62
ENSG00000135299	ANKRD6	ankyrin repeat domain 6 [Source:HGNC Symbol;Acc:HGNC:17280]	15.3333	21	126.333	-0.071678	0.884282	2.24784	1.43515e-09	2.38882	3.87245e-18
ENSG00000064999	ANKS1A	ankyrin repeat and sterile alpha motif domain containing 1A [Source:HGNC Symbol;Acc:HGNC:20961]	35.6667	39.3333	213	-0.422366	0.291517	1.77082	4.39229e-10	2.23834	3.08495e-25
ENSG00000168096	ANKS3	ankyrin repeat and sterile alpha motif domain containing 3 [Source:HGNC Symbol;Acc:HGNC:29422]	40.6667	42	336	-0.435433	0.226113	2.26927	6.39172e-17	2.79285	1.59981e-54
ENSG00000272872	AP000525.1	novel transcript, sense intronic to novel transcript	26.6667	31.6667	369	-0.238226	0.566629	3.00505	5.49247e-25	3.33529	6.2404e-67
ENSG00000266602	AP005262.1	novel transcript	5.66667	0	0	-5.51402	0.000230031	-5.77177	0.000115604
ENSG00000100280	AP1B1	adaptor related protein complex 1 subunit beta 1 [Source:HGNC Symbol;Acc:HGNC:554]	134	262.333	1629.33	0.288245	0.271087	2.70944	4.50363e-37	2.43076	2.94793e-154
ENSG00000065000	AP3D1	adaptor related protein complex 3 subunit delta 1 [Source:HGNC Symbol;Acc:HGNC:568]	326.333	436.667	2650	-0.0721938	0.72113	2.28383	5.87195e-29	2.39608	4.47209e-194
ENSG00000134262	AP4B1	adaptor related protein complex 4 subunit beta 1 [Source:HGNC Symbol;Acc:HGNC:572]	23.3333	31	194.333	-0.119584	0.769868	2.25108	1.63355e-13	2.4428	9.09921e-30
ENSG00000242802	AP5Z1	adaptor related protein complex 5 subunit zeta 1 [Source:HGNC Symbol;Acc:HGNC:22197]	42.3333	53	438.667	-0.18244	0.591586	2.59158	2.82442e-23	2.84458	1.1451e-67
ENSG00000120868	APAF1	apoptotic peptidase activating factor 1 [Source:HGNC Symbol;Acc:HGNC:576]	17	23.3333	127.333	-0.101319	0.822946	2.08159	1.50825e-09	2.24552	1.43152e-18
ENSG00000034053	APBA2	amyloid beta precursor protein binding family A member 2 [Source:HGNC Symbol;Acc:HGNC:579]	9.66667	12.6667	148.333	-0.211969	0.732577	3.11728	8.72296e-16	3.35193	1.98679e-28
ENSG00000113108	APBB3	amyloid beta precursor protein binding family B member 3 [Source:HGNC Symbol;Acc:HGNC:20708]	6	10.3333	55.6667	0.246161	0.716136	2.40268	2.02411e-06	2.22755	4.0037e-09
ENSG00000169621	APLF	aprataxin and PNKP like factor [Source:HGNC Symbol;Acc:HGNC:28724]	11	4.66667	15.6667	-1.88565	0.00785908	-0.379362	0.490026	1.54202	0.0134516
ENSG00000178878	APOLD1	apolipoprotein L domain containing 1 [Source:HGNC Symbol;Acc:HGNC:25268]	6.33333	21.6667	9	1.30344	0.052053	-0.193622	0.79948	-1.4602	0.00346349
ENSG00000186635	ARAP1	ArfGAP with RhoGAP domain, ankyrin repeat and PH domain 1 [Source:HGNC Symbol;Acc:HGNC:16925]	61	100.667	703.333	0.314071	0.350963	2.84042	1.6362e-20	2.59821	4.0987e-93
ENSG00000047365	ARAP2	ArfGAP with RhoGAP domain, ankyrin repeat and PH domain 2 [Source:HGNC Symbol;Acc:HGNC:16924]	5.66667	7.33333	39.3333	-0.0739079	0.932396	2.03584	0.000342804	2.22789	1.10467e-06
ENSG00000143761	ARF1	ADP ribosylation factor 1 [Source:HGNC Symbol;Acc:HGNC:652]	773.333	1661	317.667	0.654193	0.00135936	-1.95694	2.649e-14	-2.58785	1.83459e-152
ENSG00000168374	ARF4	ADP ribosylation factor 4 [Source:HGNC Symbol;Acc:HGNC:655]	196	393.667	31.6667	0.530754	0.0165623	-3.33691	1.98947e-24	-3.84264	1.41911e-89
ENSG00000101199	ARFGAP1	ADP ribosylation factor GTPase activating protein 1 [Source:HGNC Symbol;Acc:HGNC:15852]	79.3333	125.667	968.333	0.179329	0.520381	2.84084	1.40444e-35	2.73913	1.06351e-122
ENSG00000124198	ARFGEF2	ADP ribosylation factor guanine nucleotide exchange factor 2 [Source:HGNC Symbol;Acc:HGNC:15853]	32.6667	40.6667	213.333	-0.154803	0.683049	1.93928	9.31044e-11	2.18351	1.44568e-28
ENSG00000112379	ARFGEF3	ARFGEF family member 3 [Source:HGNC Symbol;Acc:HGNC:21213]	12.6667	29.6667	172.667	0.636852	0.217376	2.93611	1.15975e-12	2.33508	8.7004e-24
ENSG00000107863	ARHGAP21	Rho GTPase activating protein 21 [Source:HGNC Symbol;Acc:HGNC:23725]	73.3333	116	780	-0.00681429	0.98155	2.52381	3.37415e-26	2.54434	2.07209e-95
ENSG00000159314	ARHGAP27	Rho GTPase activating protein 27 [Source:HGNC Symbol;Acc:HGNC:31813]	4	6.66667	43	0.282568	0.752091	2.64673	9.79697e-06	2.48596	3.17404e-08
ENSG00000134909	ARHGAP32	Rho GTPase activating protein 32 [Source:HGNC Symbol;Acc:HGNC:17399]	29	38.6667	265.333	0.0146864	0.973275	2.47494	9.00496e-13	2.56888	3.43119e-40
ENSG00000147799	ARHGAP39	Rho GTPase activating protein 39 [Source:HGNC Symbol;Acc:HGNC:29351]	28.6667	30.6667	256	-0.425043	0.275124	2.35187	2.69577e-17	2.85483	5.91647e-44
ENSG00000180448	ARHGAP45	Rho GTPase activating protein 45 [Source:HGNC Symbol;Acc:HGNC:17102]	3.66667	4.33333	47.3333	-0.182921	0.86579	2.9052	1.86772e-06	3.24343	2.63542e-10
ENSG00000076928	ARHGEF1	Rho guanine nucleotide exchange factor 1 [Source:HGNC Symbol;Acc:HGNC:681]	29.6667	75	297	0.852089	0.0165158	2.56936	3.07137e-15	1.78581	4.0652e-26
ENSG00000074964	ARHGEF10L	Rho guanine nucleotide exchange factor 10 like [Source:HGNC Symbol;Acc:HGNC:25540]	11	17.3333	124	0.261864	0.695447	2.73071	4.27384e-10	2.62654	3.94992e-20
ENSG00000132694	ARHGEF11	Rho guanine nucleotide exchange factor 11 [Source:HGNC Symbol;Acc:HGNC:14580]	17.6667	35.6667	182.667	0.427832	0.305282	2.5315	2.63762e-15	2.15059	1.13849e-24
ENSG00000130762	ARHGEF16	Rho guanine nucleotide exchange factor 16 [Source:HGNC Symbol;Acc:HGNC:15515]	7.33333	20.3333	130.333	1.00337	0.107859	3.36736	2.79736e-14	2.47679	9.94576e-21
ENSG00000165801	ARHGEF40	Rho guanine nucleotide exchange factor 40 [Source:HGNC Symbol;Acc:HGNC:25516]	16.6667	22.3333	163.333	-0.0821597	0.865788	2.48617	1.5827e-13	2.66019	5.1986e-27
ENSG00000102606	ARHGEF7	Rho guanine nucleotide exchange factor 7 [Source:HGNC Symbol;Acc:HGNC:15607]	45.3333	63.3333	363.333	0.0044622	0.989227	2.23979	6.79405e-16	2.31458	1.16377e-47
ENSG00000049618	ARID1B	AT-rich interaction domain 1B [Source:HGNC Symbol;Acc:HGNC:18040]	108	139	754.333	-0.0818096	0.769096	2.10737	5.7113e-15	2.23768	2.41601e-77
ENSG00000054267	ARID4B	AT-rich interaction domain 4B [Source:HGNC Symbol;Acc:HGNC:15550]	59.3333	110.667	721.333	0.353177	0.213205	2.79347	5.84507e-34	2.49953	3.431e-87
ENSG00000177479	ARIH2	ariadne RBR E3 ubiquitin protein ligase 2 [Source:HGNC Symbol;Acc:HGNC:690]	185.333	241	1242	-0.0802481	0.739839	2.04154	3.13025e-17	2.16215	7.04329e-97
ENSG00000100325	ASCC2	activating signal cointegrator 1 complex subunit 2 [Source:HGNC Symbol;Acc:HGNC:24103]	113	132	1076.67	-0.207577	0.475349	2.56674	1.57405e-20	2.82388	9.21584e-134
ENSG00000116539	ASH1L	ASH1 like histone lysine methyltransferase [Source:HGNC Symbol;Acc:HGNC:19088]	25.6667	48	297.667	0.347569	0.354889	2.72486	2.16096e-22	2.43116	1.10488e-40
ENSG00000130707	ASS1	argininosuccinate synthase 1 [Source:HGNC Symbol;Acc:HGNC:758]	64.3333	255.667	138	1.37877	1.39838e-07	0.237479	0.365968	-1.09401	1.54001e-14
ENSG00000171456	ASXL1	ASXL transcriptional regulator 1 [Source:HGNC Symbol;Acc:HGNC:18318]	104.333	120	1447	-0.213012	0.475699	3.11365	3.33319e-28	3.38618	2.8538e-211
ENSG00000119778	ATAD2B	ATPase family AAA domain containing 2B [Source:HGNC Symbol;Acc:HGNC:29230]	16.3333	22.6667	126	0.0904423	0.869137	2.23435	8.254e-08	2.27056	9.15005e-19
ENSG00000197785	ATAD3A	ATPase family AAA domain containing 3A [Source:HGNC Symbol;Acc:HGNC:25567]	128.333	188	1222.67	-0.258207	0.416302	2.26524	5.56948e-18	2.49782	3.016e-129
ENSG00000176208	ATAD5	ATPase family AAA domain containing 5 [Source:HGNC Symbol;Acc:HGNC:25752]	26.3333	31.6667	240	-0.223095	0.60299	2.41758	3.03778e-14	2.72111	7.67727e-37
ENSG00000171681	ATF7IP	activating transcription factor 7 interacting protein [Source:HGNC Symbol;Acc:HGNC:20092]	29	46.3333	253.667	0.127241	0.741961	2.31468	2.85777e-13	2.24727	1.12968e-33
ENSG00000110046	ATG2A	autophagy related 2A [Source:HGNC Symbol;Acc:HGNC:29028]	43	56	631.667	-0.616881	0.185463	2.75651	8.75771e-14	3.29075	3.6932e-101
ENSG00000066739	ATG2B	autophagy related 2B [Source:HGNC Symbol;Acc:HGNC:20187]	36.3333	50	311	-0.0428092	0.901055	2.31461	1.91924e-17	2.4331	2.55218e-44
ENSG00000198513	ATL1	atlastin GTPase 1 [Source:HGNC Symbol;Acc:HGNC:11231]	4.33333	17.3333	8.66667	1.41228	0.0337893	0.136563	0.859558	-1.20474	0.0188497
ENSG00000149311	ATM	ATM serine/threonine kinase [Source:HGNC Symbol;Acc:HGNC:795]	38	47.6667	713.667	-0.553219	0.201778	3.2052	1.51389e-21	3.69985	2.93019e-124
ENSG00000068650	ATP11A	ATPase phospholipid transporting 11A [Source:HGNC Symbol;Acc:HGNC:13552]	14	21.3333	127	0.248327	0.676884	2.45514	5.53788e-09	2.36509	2.0846e-19
ENSG00000058668	ATP2B4	ATPase plasma membrane Ca2+ transporting 4 [Source:HGNC Symbol;Acc:HGNC:817]	16	45.3333	114.333	1.01664	0.0159103	2.06612	6.30965e-08	1.12655	3.92882e-07
ENSG00000241468	ATP5MF	ATP synthase membrane subunit f [Source:HGNC Symbol;Acc:HGNC:848]	227.667	509	153	0.563751	0.00778958	-1.3993	4.95973e-11	-1.93486	2.64498e-47
ENSG00000143515	ATP8B2	ATPase phospholipid transporting 8B2 [Source:HGNC Symbol;Acc:HGNC:13534]	84	180.333	401	0.533211	0.0285921	1.43216	6.74966e-11	0.949109	2.83134e-14
ENSG00000166377	ATP9B	ATPase phospholipid transporting 9B (putative) [Source:HGNC Symbol;Acc:HGNC:13541]	6.66667	8.66667	46.6667	-0.0600936	0.937385	2.05685	0.000576467	2.21461	4.20226e-07
ENSG00000175054	ATR	ATR serine/threonine kinase [Source:HGNC Symbol;Acc:HGNC:882]	32.3333	54	401	0.153441	0.674094	2.79687	2.00647e-22	2.68757	2.38773e-58
ENSG00000087152	ATXN7L3	ataxin 7 like 3 [Source:HGNC Symbol;Acc:HGNC:25416]	59.3333	63.6667	582.333	-0.302493	0.398634	2.59891	2.6088e-17	2.98611	6.63262e-93
ENSG00000103126	AXIN1	axin 1 [Source:HGNC Symbol;Acc:HGNC:903]	59.3333	74	459	-0.607136	0.136363	1.86824	3.4081e-08	2.42797	4.00474e-62
ENSG00000172318	B3GALT1	beta-1,3-galactosyltransferase 1 [Source:HGNC Symbol;Acc:HGNC:916]	1.66667	11.3333	5.33333	2.21443	0.0222688	0.902948	0.441382	-1.28964	0.0484838
ENSG00000108641	B9D1	B9 domain containing 1 [Source:HGNC Symbol;Acc:HGNC:24123]	149	311.667	56.6667	0.641379	0.0167388	-2.04288	3.46126e-09	-2.66319	7.70611e-55
ENSG00000266074	BAHCC1	BAH domain and coiled-coil containing 1 [Source:HGNC Symbol;Acc:HGNC:29279]	15	35.6667	390.333	0.657821	0.13902	3.87175	1.36166e-34	3.24994	4.25324e-65
ENSG00000131668	BARX1	BARX homeobox 1 [Source:HGNC Symbol;Acc:HGNC:955]	133.333	42.6667	82.6667	-1.9129	6.18465e-06	-1.20929	0.00766909	0.751835	0.00204054
ENSG00000176788	BASP1	brain abundant membrane attached signal protein 1 [Source:HGNC Symbol;Acc:HGNC:957]	9	43	107.667	1.81004	0.000494306	2.82432	3.32243e-10	1.11642	6.255e-07
ENSG00000186174	BCL9L	BCL9 like [Source:HGNC Symbol;Acc:HGNC:23688]	4.33333	10	52.3333	0.77803	0.358833	2.85173	1.56886e-05	2.18196	9.22374e-08
ENSG00000183337	BCOR	BCL6 corepressor [Source:HGNC Symbol;Acc:HGNC:20893]	55	88.3333	706	0.174946	0.579591	2.9051	2.75314e-30	2.79721	3.62842e-90
ENSG00000085185	BCORL1	BCL6 corepressor like 1 [Source:HGNC Symbol;Acc:HGNC:25657]	39	46.6667	234.333	-0.239384	0.508014	1.7961	4.00304e-10	2.11448	3.91135e-27
ENSG00000186716	BCR	BCR activator of RhoGEF and GTPase [Source:HGNC Symbol;Acc:HGNC:1014]	61.3333	81.3333	798.333	-0.0499216	0.874143	2.95839	4.16367e-29	3.08977	4.60777e-121
ENSG00000074582	BCS1L	BCS1 homolog, ubiquinol-cytochrome c reductase complex chaperone [Source:HGNC Symbol;Acc:HGNC:1020]	51	111	150.333	0.671446	0.0381618	0.865771	0.0131778	0.235385	0.192786
ENSG00000161267	BDH1	3-hydroxybutyrate dehydrogenase 1 [Source:HGNC Symbol;Acc:HGNC:1027]	13	2	0	-3.21305	0.000324508	-6.93499	2.36745e-07
ENSG00000145734	BDP1	B double prime 1, subunit of RNA polymerase III transcription initiation factor IIIB [Source:HGNC Symbol;Acc:HGNC:13652]	17.6667	21	143.667	-0.286635	0.573664	2.21888	1.47372e-10	2.57197	1.96497e-22
ENSG00000151746	BICD1	BICD cargo adaptor 1 [Source:HGNC Symbol;Acc:HGNC:1049]	9.66667	10	51	-0.35268	0.61101	1.65684	0.0010489	2.14091	4.15251e-08
ENSG00000115760	BIRC6	baculoviral IAP repeat containing 6 [Source:HGNC Symbol;Acc:HGNC:13516]	48.6667	68	496	0.0139754	0.967437	2.60935	3.10726e-20	2.66448	1.03714e-69
ENSG00000197299	BLM	BLM RecQ like helicase [Source:HGNC Symbol;Acc:HGNC:1058]	39.3333	64.3333	478.667	0.158971	0.619587	2.79088	7.72906e-28	2.69161	7.9106e-71
ENSG00000168487	BMP1	bone morphogenetic protein 1 [Source:HGNC Symbol;Acc:HGNC:1067]	20.6667	32	274	0.0972393	0.828232	2.93072	4.56752e-16	2.88769	6.14858e-38
ENSG00000165733	BMS1	BMS1 ribosome biogenesis factor [Source:HGNC Symbol;Acc:HGNC:23505]	154.333	181	1697.67	-0.108669	0.735194	2.86231	7.43832e-18	3.02277	5.18159e-213
ENSG00000163170	BOLA3	bolA family member 3 [Source:HGNC Symbol;Acc:HGNC:24415]	113.667	239	136.333	0.55777	0.0152845	-0.495809	0.0582244	-1.01074	9.61548e-12
ENSG00000136122	BORA	BORA aurora kinase A activator [Source:HGNC Symbol;Acc:HGNC:24724]	52.3333	116.333	257.667	0.637552	0.0259716	1.52868	1.44016e-08	0.947316	2.06437e-09
ENSG00000171634	BPTF	bromodomain PHD finger transcription factor [Source:HGNC Symbol;Acc:HGNC:3581]	143	194.667	1552	-0.10715	0.633928	2.63574	1.3122e-42	2.78953	2.96254e-180
ENSG00000139618	BRCA2	BRCA2 DNA repair associated [Source:HGNC Symbol;Acc:HGNC:1101]	35.3333	66	372.667	0.416879	0.225314	2.62511	6.01871e-20	2.28942	1.4802e-48
ENSG00000100425	BRD1	bromodomain containing 1 [Source:HGNC Symbol;Acc:HGNC:1102]	40.6667	58.6667	597.667	-0.00764198	0.981029	3.06615	1.43952e-33	3.13936	7.74566e-93
ENSG00000204256	BRD2	bromodomain containing 2 [Source:HGNC Symbol;Acc:HGNC:1103]	138.667	188.667	1146.67	0.0651232	0.827545	2.41377	4.26569e-15	2.39689	7.48114e-120
ENSG00000112983	BRD8	bromodomain containing 8 [Source:HGNC Symbol;Acc:HGNC:19874]	92.3333	125.333	1120.67	-0.0205424	0.940129	2.88086	2.5427e-28	2.95836	4.26129e-133
ENSG00000028310	BRD9	bromodomain containing 9 [Source:HGNC Symbol;Acc:HGNC:25818]	85	99	796.333	-0.544013	0.0985716	2.27036	1.65867e-17	2.80075	2.22216e-108
ENSG00000185024	BRF1	BRF1 RNA polymerase III transcription initiation factor subunit [Source:HGNC Symbol;Acc:HGNC:11551]	44.3333	53.3333	446.667	-0.261298	0.465777	2.53148	3.28701e-21	2.85695	8.65158e-68
ENSG00000156983	BRPF1	bromodomain and PHD finger containing 1 [Source:HGNC Symbol;Acc:HGNC:14255]	29.3333	32.6667	350	-0.459447	0.263938	2.73159	2.32553e-22	3.21761	2.11328e-61
ENSG00000096070	BRPF3	bromodomain and PHD finger containing 3 [Source:HGNC Symbol;Acc:HGNC:14256]	31.6667	49.6667	310	0.0435967	0.903048	2.4453	3.05647e-18	2.44122	1.53751e-41
ENSG00000095564	BTAF1	B-TFIID TATA-box binding protein associated factor 1 [Source:HGNC Symbol;Acc:HGNC:17307]	65.6667	86.6667	1481	-0.169816	0.554217	3.67276	1.22376e-58	3.89144	1.02205e-222
ENSG00000235162	C12orf75	chromosome 12 open reading frame 75 [Source:HGNC Symbol;Acc:HGNC:35164]	77.6667	160.667	143	0.559507	0.0335669	0.134938	0.630387	-0.372294	0.017353
ENSG00000105072	C19orf44	chromosome 19 open reading frame 44 [Source:HGNC Symbol;Acc:HGNC:26141]	20.6667	23	379.667	-0.455989	0.299566	3.35883	2.60897e-27	3.84382	3.07714e-68
ENSG00000104979	C19orf53	chromosome 19 open reading frame 53 [Source:HGNC Symbol;Acc:HGNC:24991]	299.333	401.667	2267	-0.121814	0.520479	2.13174	1.05777e-32	2.29206	4.96034e-165
ENSG00000143633	C1orf131	chromosome 1 open reading frame 131 [Source:HGNC Symbol;Acc:HGNC:25332]	55.6667	123.333	67.6667	0.688325	0.023947	-0.426023	0.218363	-1.07275	5.38019e-08
ENSG00000143443	C1orf56	chromosome 1 open reading frame 56 [Source:HGNC Symbol;Acc:HGNC:26045]	18.6667	47.3333	13.6667	0.89428	0.0428124	-1.15442	0.0432259	-2.00647	5.23338e-08
ENSG00000168014	C2CD3	C2 domain containing 3 centriole elongation regulator [Source:HGNC Symbol;Acc:HGNC:24564]	22.3333	42.3333	252.667	0.42432	0.296363	2.71413	1.47244e-17	2.37257	2.43749e-34
ENSG00000188315	C3orf62	chromosome 3 open reading frame 62 [Source:HGNC Symbol;Acc:HGNC:24771]	7	9	253.333	-0.17007	0.799638	4.35837	4.15471e-27	4.60702	1.36635e-48
ENSG00000171159	C9orf16	chromosome 9 open reading frame 16 [Source:HGNC Symbol;Acc:HGNC:17823]	86.6667	177.333	27.6667	0.654564	0.0486081	-2.24188	2.42712e-07	-2.87945	1.05539e-35
ENSG00000178538	CA8	carbonic anhydrase 8 [Source:HGNC Symbol;Acc:HGNC:1382]	19.3333	63	21	1.1927	0.00193143	-0.655245	0.15456	-1.78969	2.42076e-09
ENSG00000099991	CABIN1	calcineurin binding protein 1 [Source:HGNC Symbol;Acc:HGNC:24187]	66	83	1079.67	-0.166104	0.565145	3.26012	5.4572e-43	3.49588	2.83453e-172
ENSG00000196557	CACNA1H	calcium voltage-gated channel subunit alpha1 H [Source:HGNC Symbol;Acc:HGNC:1395]	13.6667	26.6667	354.667	0.546241	0.338816	3.93372	1.49335e-27	3.52732	9.01977e-64
ENSG00000105298	CACTIN	cactin, spliceosome C complex subunit [Source:HGNC Symbol;Acc:HGNC:29938]	36	45	282.667	-0.12059	0.753158	2.24299	1.32771e-12	2.44683	3.41687e-41
ENSG00000084774	CAD	carbamoyl-phosphate synthetase 2, aspartate transcarbamylase, and dihydroorotase [Source:HGNC Symbol;Acc:HGNC:1424]	178.667	209	2155	-0.280944	0.219492	2.83313	2.21487e-42	3.161	6.7885e-232
ENSG00000175868	CALCB	calcitonin related polypeptide beta [Source:HGNC Symbol;Acc:HGNC:1438]	125.333	476.333	56	1.43074	1.66513e-10	-1.90531	8.47653e-11	-3.29665	4.31144e-97
ENSG00000183049	CAMK1D	calcium/calmodulin dependent protein kinase ID [Source:HGNC Symbol;Acc:HGNC:19341]	10.3333	32	40	1.09608	0.0282029	1.1396	0.0198635	0.118703	0.704863
ENSG00000058404	CAMK2B	calcium/calmodulin dependent protein kinase II beta [Source:HGNC Symbol;Acc:HGNC:1461]	2.66667	12	47	1.6721	0.0483738	3.34603	4.43242e-07	1.76618	2.91453e-06
ENSG00000004660	CAMKK1	calcium/calmodulin dependent protein kinase kinase 1 [Source:HGNC Symbol;Acc:HGNC:1469]	15.6667	40.3333	256	0.929967	0.0577228	3.2786	3.81889e-18	2.4599	1.29882e-37
ENSG00000164076	CAMKV	CaM kinase like vesicle associated [Source:HGNC Symbol;Acc:HGNC:28788]	8	14.3333	98.6667	0.423073	0.522554	2.85711	2.53667e-10	2.57736	2.42651e-17
ENSG00000130559	CAMSAP1	calmodulin regulated spectrin associated protein 1 [Source:HGNC Symbol;Acc:HGNC:19946]	40.3333	62.3333	462	0.0715843	0.828044	2.70557	2.54645e-27	2.68644	2.49776e-65
ENSG00000108509	CAMTA2	calmodulin binding transcription activator 2 [Source:HGNC Symbol;Acc:HGNC:18807]	42.6667	58.6667	512	-0.0652276	0.847893	2.79189	2.05483e-27	2.92169	5.60046e-77
ENSG00000144712	CAND2	cullin associated and neddylation dissociated 2 (putative) [Source:HGNC Symbol;Acc:HGNC:30689]	24	62.6667	238.667	0.953959	0.023525	2.58288	4.85058e-13	1.72229	5.35321e-22
ENSG00000042493	CAPG	capping actin protein, gelsolin like [Source:HGNC Symbol;Acc:HGNC:1474]	3.33333	20	5.66667	2.06796	0.00533121	0.0253504	0.9796	-2.01707	0.000241883
ENSG00000103326	CAPN15	calpain 15 [Source:HGNC Symbol;Acc:HGNC:11182]	23	32.3333	241.333	0.0411721	0.92553	2.63406	2.66136e-15	2.69356	9.00651e-40
ENSG00000162909	CAPN2	calpain 2 [Source:HGNC Symbol;Acc:HGNC:1479]	137.667	327.333	735.333	0.886774	0.0037457	1.8141	6.92924e-08	0.964372	3.41796e-21
ENSG00000126247	CAPNS1	calpain small subunit 1 [Source:HGNC Symbol;Acc:HGNC:1481]	130	314	78.3333	0.718186	0.00236769	-1.52255	4.77483e-09	-2.20268	3.84894e-41
ENSG00000110888	CAPRIN2	caprin family member 2 [Source:HGNC Symbol;Acc:HGNC:21259]	9.33333	16.3333	177.333	0.292005	0.6011	3.45262	1.67162e-16	3.24254	1.26464e-30
ENSG00000100065	CARD10	caspase recruitment domain family member 10 [Source:HGNC Symbol;Acc:HGNC:16422]	7	10.6667	99.3333	0.150235	0.837798	3.04925	2.26501e-10	3.01843	7.53834e-19
ENSG00000138380	CARF	calcium responsive transcription factor [Source:HGNC Symbol;Acc:HGNC:14435]	3.66667	4	35	-0.692027	0.468186	2.33705	0.000395405	2.93493	1.13232e-07
ENSG00000167971	CASKIN1	CASK interacting protein 1 [Source:HGNC Symbol;Acc:HGNC:20879]	7.33333	9.33333	238	-0.38367	0.577494	4.15714	3.05548e-23	4.46838	1.51348e-46
ENSG00000153113	CAST	calpastatin [Source:HGNC Symbol;Acc:HGNC:1515]	115.333	157.667	1416	-0.13361	0.589616	2.7942	5.76924e-43	2.963	2.1946e-173
ENSG00000130940	CASZ1	castor zinc finger 1 [Source:HGNC Symbol;Acc:HGNC:26002]	10.6667	16.6667	89.3333	0.262553	0.700366	2.3273	2.91878e-07	2.21432	1.14312e-12
ENSG00000105971	CAV2	caveolin 2 [Source:HGNC Symbol;Acc:HGNC:1528]	13	36.6667	4.66667	0.950804	0.0383447	-2.28359	0.00401623	-3.17886	1.95524e-09
ENSG00000204778	CBWD4P	COBW domain containing 4, pseudogene [Source:HGNC Symbol;Acc:HGNC:18520]	10	12.6667	71	-0.205604	0.731306	2.00956	3.38739e-06	2.2799	1.22145e-11
ENSG00000132024	CC2D1A	coiled-coil and C2 domain containing 1A [Source:HGNC Symbol;Acc:HGNC:30237]	25	33.6667	276.667	-0.138052	0.747025	2.6513	6.34827e-21	2.83569	1.8553e-42
ENSG00000154222	CC2D1B	coiled-coil and C2 domain containing 1B [Source:HGNC Symbol;Acc:HGNC:29386]	48.6667	72.3333	431	0.0842762	0.791873	2.38769	1.36676e-17	2.36872	3.4146e-55
ENSG00000048342	CC2D2A	coiled-coil and C2 domain containing 2A [Source:HGNC Symbol;Acc:HGNC:29253]	12.3333	38.3333	72	1.05151	0.0185205	1.694	6.1372e-05	0.700418	0.00771584
ENSG00000060339	CCAR1	cell division cycle and apoptosis regulator 1 [Source:HGNC Symbol;Acc:HGNC:24236]	260.333	384	2635	-0.13765	0.571335	2.43964	9.37506e-35	2.57471	2.77136e-186
ENSG00000128596	CCDC136	coiled-coil domain containing 136 [Source:HGNC Symbol;Acc:HGNC:22225]	13	14	82.6667	-0.42023	0.457014	1.87329	6.70666e-06	2.35818	1.27606e-13
ENSG00000175455	CCDC14	coiled-coil domain containing 14 [Source:HGNC Symbol;Acc:HGNC:25766]	56	67.6667	579.667	-0.391708	0.226726	2.48986	2.8185e-23	2.89524	8.35775e-88
ENSG00000135637	CCDC142	coiled-coil domain containing 142 [Source:HGNC Symbol;Acc:HGNC:25889]	14.3333	24	202.333	-0.893864	0.217451	2.10847	0.0010556	2.86607	3.03652e-33
ENSG00000144395	CCDC150	coiled-coil domain containing 150 [Source:HGNC Symbol;Acc:HGNC:26834]	19	21.6667	533.667	-0.346549	0.440249	4.00362	1.48531e-41	4.41872	2.01646e-97
ENSG00000122483	CCDC18	coiled-coil domain containing 18 [Source:HGNC Symbol;Acc:HGNC:30370]	33	48	631.667	0.0583513	0.874419	3.47505	9.6419e-38	3.51168	6.73134e-111
ENSG00000163617	CCDC191	coiled-coil domain containing 191 [Source:HGNC Symbol;Acc:HGNC:29272]	3.33333	6.33333	38	0.231699	0.80585	2.65422	3.05284e-05	2.39046	7.29916e-07
ENSG00000159214	CCDC24	coiled-coil domain containing 24 [Source:HGNC Symbol;Acc:HGNC:28688]	3.33333	14.3333	8.33333	1.60487	0.0418236	0.576378	0.537949	-0.981808	0.0716939
ENSG00000180376	CCDC66	coiled-coil domain containing 66 [Source:HGNC Symbol;Acc:HGNC:27709]	21.6667	24	233	-0.314595	0.524848	2.66792	2.6744e-15	3.07756	3.56714e-40
ENSG00000115355	CCDC88A	coiled-coil domain containing 88A [Source:HGNC Symbol;Acc:HGNC:25523]	45.6667	78	403	0.177146	0.567705	2.30058	6.39624e-19	2.16733	2.11454e-45
ENSG00000015133	CCDC88C	coiled-coil domain containing 88C [Source:HGNC Symbol;Acc:HGNC:19967]	324.667	359.667	2715	-0.133421	0.693745	2.53474	2.36359e-11	2.71221	2.02205e-189
ENSG00000125633	CCDC93	coiled-coil domain containing 93 [Source:HGNC Symbol;Acc:HGNC:25611]	72	79.6667	844.667	-0.367389	0.220041	2.77729	1.89116e-30	3.19991	1.47512e-116
ENSG00000142871	CCN1	cellular communication network factor 1 [Source:HGNC Symbol;Acc:HGNC:2654]	237.333	99.6667	133	-1.61113	9.05869e-08	-1.4382	1.9046e-05	0.210985	0.226717
ENSG00000110092	CCND1	cyclin D1 [Source:HGNC Symbol;Acc:HGNC:1582]	3.66667	16.6667	16	1.70242	0.0220224	1.35794	0.0703295	-0.272326	0.546377
ENSG00000162063	CCNF	cyclin F [Source:HGNC Symbol;Acc:HGNC:1591]	78	94	492	-0.342104	0.216203	1.80687	5.78033e-16	2.18258	8.86973e-58
ENSG00000163660	CCNL1	cyclin L1 [Source:HGNC Symbol;Acc:HGNC:20569]	92.3333	115.667	689.667	-0.360347	0.232262	2.00612	8.27982e-17	2.37383	8.61997e-79
ENSG00000221978	CCNL2	cyclin L2 [Source:HGNC Symbol;Acc:HGNC:20570]	172	222.333	1694	-0.141499	0.512591	2.53671	2.20425e-34	2.72613	2.82689e-172
ENSG00000140326	CDAN1	codanin 1 [Source:HGNC Symbol;Acc:HGNC:1713]	13.3333	16.3333	101.333	-0.311117	0.544239	2.07967	9.54087e-08	2.4296	3.9637e-16
ENSG00000170558	CDH2	cadherin 2 [Source:HGNC Symbol;Acc:HGNC:1759]	92.6667	225.333	224	0.721265	0.00204037	0.459884	0.0557357	-0.213946	0.125357
ENSG00000139880	CDH24	cadherin 24 [Source:HGNC Symbol;Acc:HGNC:14265]	4.66667	9	75.3333	0.508018	0.532039	3.23097	2.25129e-09	2.85725	1.29614e-14
ENSG00000148600	CDHR1	cadherin related family member 1 [Source:HGNC Symbol;Acc:HGNC:14550]	4.33333	25.6667	301.333	2.0629	0.00123567	5.31244	5.05525e-29	3.34825	2.6292e-56
ENSG00000167258	CDK12	cyclin dependent kinase 12 [Source:HGNC Symbol;Acc:HGNC:24224]	73	112.667	576.333	0.0771177	0.771024	2.17929	3.5437e-21	2.15143	3.69581e-56
ENSG00000065883	CDK13	cyclin dependent kinase 13 [Source:HGNC Symbol;Acc:HGNC:1733]	42	64	473	0.0192239	0.956613	2.64684	5.65224e-21	2.67784	1.72574e-69
ENSG00000136861	CDK5RAP2	CDK5 regulatory subunit associated protein 2 [Source:HGNC Symbol;Acc:HGNC:18672]	77	113	1090	0.0692735	0.800603	3.06252	7.00054e-39	3.06477	6.05743e-156
ENSG00000105810	CDK6	cyclin dependent kinase 6 [Source:HGNC Symbol;Acc:HGNC:1777]	12.3333	73.3333	27.3333	2.05269	3.72666e-07	0.37418	0.444506	-1.62588	1.72128e-09
ENSG00000008086	CDKL5	cyclin dependent kinase like 5 [Source:HGNC Symbol;Acc:HGNC:11411]	3.33333	5.66667	33	0.291433	0.767692	2.51968	0.000268142	2.34049	3.25241e-06
ENSG00000147883	CDKN2B	cyclin dependent kinase inhibitor 2B [Source:HGNC Symbol;Acc:HGNC:1788]	8	49.3333	56.6667	2.10973	1.33174e-05	2.01966	1.22181e-05	-0.00674854	0.978941
ENSG00000153879	CEBPG	CCAAT enhancer binding protein gamma [Source:HGNC Symbol;Acc:HGNC:1837]	151.333	336.667	119.667	0.628926	0.00311009	-1.11057	4.37502e-06	-1.69705	2.37653e-34
ENSG00000048740	CELF2	CUGBP Elav-like family member 2 [Source:HGNC Symbol;Acc:HGNC:2550]	19	63.3333	17	1.25042	0.002589	-0.859674	0.109476	-2.09159	4.39156e-10
ENSG00000075275	CELSR1	cadherin EGF LAG seven-pass G-type receptor 1 [Source:HGNC Symbol;Acc:HGNC:1850]	25.3333	48.3333	391	0.495496	0.244716	3.19727	5.90713e-23	2.80908	1.2704e-59
ENSG00000143126	CELSR2	cadherin EGF LAG seven-pass G-type receptor 2 [Source:HGNC Symbol;Acc:HGNC:3231]	5	9.33333	74	0.462877	0.556338	3.11243	5.10163e-09	2.78466	5.26764e-14
ENSG00000008300	CELSR3	cadherin EGF LAG seven-pass G-type receptor 3 [Source:HGNC Symbol;Acc:HGNC:3230]	18	31.3333	230	0.221394	0.621483	2.84474	2.26358e-17	2.66991	3.58273e-37
ENSG00000138778	CENPE	centromere protein E [Source:HGNC Symbol;Acc:HGNC:1856]	68	98.6667	571.667	0.0653621	0.821728	2.3264	2.4491e-19	2.32869	2.32599e-71
ENSG00000117724	CENPF	centromere protein F [Source:HGNC Symbol;Acc:HGNC:1857]	63.3333	157.333	534	0.898981	0.00485886	2.39579	3.3969e-14	1.55623	3.10556e-38
ENSG00000151849	CENPJ	centromere protein J [Source:HGNC Symbol;Acc:HGNC:17272]	31.6667	54	801.333	0.256234	0.463771	3.86863	3.49842e-48	3.68618	8.67387e-139
ENSG00000116198	CEP104	centrosomal protein 104 [Source:HGNC Symbol;Acc:HGNC:24866]	48.3333	60.6667	318	-0.184602	0.582586	1.94164	1.72523e-12	2.18756	1.76859e-38
ENSG00000174799	CEP135	centrosomal protein 135 [Source:HGNC Symbol;Acc:HGNC:29086]	31	48.6667	670	0.0552502	0.876616	3.59354	5.35431e-44	3.57864	2.54498e-116
ENSG00000103995	CEP152	centrosomal protein 152 [Source:HGNC Symbol;Acc:HGNC:29298]	20.6667	25.3333	605.667	-0.28109	0.510465	4.04352	1.02973e-45	4.37473	4.86257e-109
ENSG00000135315	CEP162	centrosomal protein 162 [Source:HGNC Symbol;Acc:HGNC:21107]	7.33333	19.3333	201.667	0.887908	0.12804	3.97272	5.54452e-22	3.17843	1.0458e-36
ENSG00000110274	CEP164	centrosomal protein 164 [Source:HGNC Symbol;Acc:HGNC:29182]	42.3333	50.6667	558	-0.331656	0.337939	2.88661	4.10817e-32	3.25772	1.16637e-92
ENSG00000099814	CEP170B	centrosomal protein 170B [Source:HGNC Symbol;Acc:HGNC:20362]	44	61.3333	653.333	0.0838543	0.827846	3.18147	3.96763e-25	3.20473	4.99784e-106
ENSG00000101639	CEP192	centrosomal protein 192 [Source:HGNC Symbol;Acc:HGNC:25515]	17	25	222.667	-0.011697	0.97931	2.88013	2.55449e-18	2.94737	5.24779e-39
ENSG00000126001	CEP250	centrosomal protein 250 [Source:HGNC Symbol;Acc:HGNC:1859]	27.6667	49.6667	468	0.435365	0.310712	3.3684	9.22281e-22	3.03029	9.55613e-77
ENSG00000198707	CEP290	centrosomal protein 290 [Source:HGNC Symbol;Acc:HGNC:29021]	42.3333	51.6667	367	-0.227308	0.483269	2.32754	2.90421e-19	2.62391	1.80776e-55
ENSG00000166004	CEP295	centrosomal protein 295 [Source:HGNC Symbol;Acc:HGNC:29366]	38.3333	62.6667	482.667	0.25722	0.503942	2.89167	1.37687e-24	2.73433	9.13211e-63
ENSG00000173588	CEP83	centrosomal protein 83 [Source:HGNC Symbol;Acc:HGNC:17966]	29.3333	30	411.333	-0.435879	0.314597	3.02142	2.58444e-27	3.56663	6.59603e-73
ENSG00000130695	CEP85	centrosomal protein 85 [Source:HGNC Symbol;Acc:HGNC:25309]	38	40	283.333	-0.449038	0.201876	2.10109	3.64139e-14	2.61912	3.50688e-42
ENSG00000121289	CEP89	centrosomal protein 89 [Source:HGNC Symbol;Acc:HGNC:25907]	36	43.3333	217.333	-0.215945	0.584811	1.82987	9.11277e-09	2.12381	8.96465e-27
ENSG00000258890	CEP95	centrosomal protein 95 [Source:HGNC Symbol;Acc:HGNC:25141]	71.3333	113.333	924	0.110566	0.675909	2.87676	2.76728e-41	2.8225	1.61524e-125
ENSG00000172831	CES2	carboxylesterase 2 [Source:HGNC Symbol;Acc:HGNC:1864]	64	84.6667	455.333	-0.233126	0.455858	1.9661	7.40447e-15	2.21957	6.05464e-44
ENSG00000172828	CES3	carboxylesterase 3 [Source:HGNC Symbol;Acc:HGNC:1865]	13.3333	21	277	0.146122	0.778856	3.57883	2.08879e-24	3.51526	8.42242e-51
ENSG00000147400	CETN2	centrin 2 [Source:HGNC Symbol;Acc:HGNC:1867]	32.6667	91	19.3333	1.0127	0.00561985	-1.45803	0.00243468	-2.43957	7.84811e-18
ENSG00000105792	CFAP69	cilia and flagella associated protein 69 [Source:HGNC Symbol;Acc:HGNC:26107]	6.66667	7.33333	66.3333	-0.416223	0.567229	2.50138	1.44032e-07	2.9724	2.53099e-13
ENSG00000197766	CFD	complement factor D [Source:HGNC Symbol;Acc:HGNC:2771]	11.6667	36	3	1.0792	0.0216944	-2.76817	0.000812077	-3.78628	2.73864e-10
ENSG00000143375	CGN	cingulin [Source:HGNC Symbol;Acc:HGNC:17429]	12	26.6667	138.333	0.650701	0.184017	2.73253	3.95925e-13	2.1673	3.11823e-19
ENSG00000128965	CHAC1	ChaC glutathione specific gamma-glutamylcyclotransferase 1 [Source:HGNC Symbol;Acc:HGNC:28680]	10	40.6667	35	1.45018	0.00197166	0.977879	0.0413952	-0.415494	0.178992
ENSG00000170791	CHCHD7	coiled-coil-helix-coiled-coil-helix domain containing 7 [Source:HGNC Symbol;Acc:HGNC:28314]	55.6667	130	244.667	0.705374	0.00863005	1.35245	9.2654e-07	0.70402	4.61608e-06
ENSG00000173575	CHD2	chromodomain helicase DNA binding protein 2 [Source:HGNC Symbol;Acc:HGNC:1917]	71.6667	93.6667	1043.33	-0.127394	0.636579	3.08141	4.61074e-42	3.27195	1.19959e-156
ENSG00000170004	CHD3	chromodomain helicase DNA binding protein 3 [Source:HGNC Symbol;Acc:HGNC:1918]	140	144.333	1013.33	-0.431402	0.0862138	2.11822	1.36603e-20	2.60548	1.24329e-119
ENSG00000124177	CHD6	chromodomain helicase DNA binding protein 6 [Source:HGNC Symbol;Acc:HGNC:19057]	47	62.6667	484.333	-0.208657	0.537825	2.50648	3.99913e-20	2.74265	6.94576e-70
ENSG00000171316	CHD7	chromodomain helicase DNA binding protein 7 [Source:HGNC Symbol;Acc:HGNC:20626]	55.6667	74	503.333	-0.0873935	0.787546	2.38528	1.01901e-22	2.55586	4.17172e-66
ENSG00000100888	CHD8	chromodomain helicase DNA binding protein 8 [Source:HGNC Symbol;Acc:HGNC:20153]	85.3333	108	1663	-0.61468	0.121705	3.1852	3.82921e-23	3.73918	1.12343e-223
ENSG00000177200	CHD9	chromodomain helicase DNA binding protein 9 [Source:HGNC Symbol;Acc:HGNC:25701]	31.3333	52	313	0.180228	0.598482	2.51076	7.88208e-20	2.38796	2.76322e-41
ENSG00000016391	CHDH	choline dehydrogenase [Source:HGNC Symbol;Acc:HGNC:24288]	27.3333	47	323.333	0.185033	0.62412	2.728	2.53675e-22	2.58087	1.35267e-46
ENSG00000101421	CHMP4B	charged multivesicular body protein 4B [Source:HGNC Symbol;Acc:HGNC:16171]	130	188.667	1870.33	0.0480981	0.838631	3.09499	2.63439e-42	3.10061	2.04782e-203
ENSG00000033100	CHPF2	chondroitin polymerizing factor 2 [Source:HGNC Symbol;Acc:HGNC:29270]	74	86.3333	502.667	-0.17499	0.614419	2.10714	1.43675e-10	2.33666	2.11892e-56
ENSG00000079432	CIC	capicua transcriptional repressor [Source:HGNC Symbol;Acc:HGNC:14214]	20.3333	52.3333	352	0.894177	0.031507	3.34717	3.53801e-25	2.54559	9.02737e-51
ENSG00000160161	CILP2	cartilage intermediate layer protein 2 [Source:HGNC Symbol;Acc:HGNC:24213]	18	19.3333	112.667	-0.389416	0.414005	1.8579	5.24362e-07	2.33107	6.27426e-17
ENSG00000122966	CIT	citron rho-interacting serine/threonine kinase [Source:HGNC Symbol;Acc:HGNC:1985]	44	62.3333	706.667	0.187197	0.680367	3.39134	2.0824e-18	3.29821	2.77073e-115
ENSG00000136026	CKAP4	cytoskeleton associated protein 4 [Source:HGNC Symbol;Acc:HGNC:16991]	173	370.333	244.333	0.542451	0.00832994	-0.29943	0.208211	-0.799375	1.4443e-09
ENSG00000140104	CLBA1	clathrin binding box of aftiphilin containing 1 [Source:HGNC Symbol;Acc:HGNC:20126]	8	15.6667	90.3333	0.295165	0.623609	2.61926	5.35417e-09	2.32586	2.36578e-14
ENSG00000114859	CLCN2	chloride voltage-gated channel 2 [Source:HGNC Symbol;Acc:HGNC:2020]	2	14	54	2.27698	0.00906781	3.94491	2.33548e-08	1.74419	7.61571e-07
ENSG00000011021	CLCN6	chloride voltage-gated channel 6 [Source:HGNC Symbol;Acc:HGNC:2024]	15.3333	17.6667	165	-0.324991	0.512222	2.62831	2.0178e-14	3.02201	2.2412e-30
ENSG00000038532	CLEC16A	C-type lectin domain containing 16A [Source:HGNC Symbol;Acc:HGNC:29013]	30	32.6667	271.333	-0.37637	0.364869	2.40858	1.22788e-14	2.85242	3.05401e-41
ENSG00000162994	CLHC1	clathrin heavy chain linker domain containing 1 [Source:HGNC Symbol;Acc:HGNC:26453]	6.66667	10.3333	58.6667	-0.014543	0.98355	2.29166	5.1904e-06	2.31066	1.7188e-09
ENSG00000130779	CLIP1	CAP-Gly domain containing linker protein 1 [Source:HGNC Symbol;Acc:HGNC:10461]	39.3333	52.6667	281.333	-0.204475	0.551715	1.97658	8.74399e-13	2.21194	1.56729e-35
ENSG00000113240	CLK4	CDC like kinase 4 [Source:HGNC Symbol;Acc:HGNC:13659]	43.6667	44.6667	255.667	-0.595125	0.110059	1.68578	2.32561e-08	2.31202	1.93239e-35
ENSG00000102805	CLN5	CLN5 intracellular trafficking protein [Source:HGNC Symbol;Acc:HGNC:2076]	45.6667	123	37.3333	0.773323	0.0201532	-1.2095	0.00237655	-1.92961	9.09532e-16
ENSG00000070371	CLTCL1	clathrin heavy chain like 1 [Source:HGNC Symbol;Acc:HGNC:2093]	18	20.6667	299	-0.410395	0.376886	3.2155	1.95798e-22	3.65281	2.59579e-52
ENSG00000132361	CLUH	clustered mitochondria homolog [Source:HGNC Symbol;Acc:HGNC:29094]	179.333	212	2172.67	-0.670074	0.0519668	2.5203	9.85413e-18	3.15157	1.72782e-243
ENSG00000137200	CMTR1	cap methyltransferase 1 [Source:HGNC Symbol;Acc:HGNC:21077]	78	116.333	643.667	0.188134	0.57049	2.39104	6.17795e-14	2.26513	5.60282e-71
ENSG00000143771	CNIH4	cornichon family AMPA receptor auxiliary protein 4 [Source:HGNC Symbol;Acc:HGNC:25013]	218	516.667	50.6667	0.786068	0.000582952	-2.78687	3.80993e-20	-3.55103	1.14691e-103
ENSG00000088038	CNOT3	CCR4-NOT transcription complex subunit 3 [Source:HGNC Symbol;Acc:HGNC:7879]	16	22	112.667	-0.00848224	0.986237	2.04237	4.22685e-08	2.14845	4.30426e-16
ENSG00000162852	CNST	consortin, connexin sorting protein [Source:HGNC Symbol;Acc:HGNC:26486]	17.3333	18	110.333	-0.65126	0.205458	1.76227	2.84506e-06	2.40928	1.42764e-17
ENSG00000018236	CNTN1	contactin 1 [Source:HGNC Symbol;Acc:HGNC:2171]	6.66667	34.3333	14.6667	1.89242	0.000712143	0.425503	0.535977	-1.43131	0.000173065
ENSG00000108797	CNTNAP1	contactin associated protein 1 [Source:HGNC Symbol;Acc:HGNC:8011]	3.66667	8.33333	76.6667	0.711035	0.426761	3.59029	2.28578e-10	3.00183	3.99126e-15
ENSG00000174469	CNTNAP2	contactin associated protein 2 [Source:HGNC Symbol;Acc:HGNC:13830]	6.33333	21.3333	2	1.24004	0.0410226	-2.41311	0.0540069	-3.59249	0.00930397
ENSG00000154529	CNTNAP3B	contactin associated protein family member 3B [Source:HGNC Symbol;Acc:HGNC:32035]	4	7.66667	60	0.365297	0.657822	3.0749	1.71403e-07	2.75469	3.09288e-11
ENSG00000170037	CNTROB	centrobin, centriole duplication and spindle assembly protein [Source:HGNC Symbol;Acc:HGNC:29616]	36.3333	52.3333	305.667	0.0839246	0.829599	2.34053	1.06108e-13	2.34164	4.75186e-40
ENSG00000168434	COG7	component of oligomeric golgi complex 7 [Source:HGNC Symbol;Acc:HGNC:18622]	24	28.3333	171	-0.345638	0.391563	1.99546	3.04462e-10	2.38658	7.31622e-25
ENSG00000121058	COIL	coilin [Source:HGNC Symbol;Acc:HGNC:2184]	59	128	69	0.571285	0.0309403	-0.577857	0.0593339	-1.09547	2.93881e-08
ENSG00000196739	COL27A1	collagen type XXVII alpha 1 chain [Source:HGNC Symbol;Acc:HGNC:22986]	31.3333	37	312	-0.362006	0.344154	2.48196	5.93237e-20	2.87434	1.15303e-49
ENSG00000139219	COL2A1	collagen type II alpha 1 chain [Source:HGNC Symbol;Acc:HGNC:2200]	0.666667	25.3333	65.3333	4.46606	9.01341e-06	5.58731	5.02737e-09	1.16219	5.31855e-05
ENSG00000092758	COL9A3	collagen type IX alpha 3 chain [Source:HGNC Symbol;Acc:HGNC:2219]	0.666667	13.6667	8.33333	3.586	0.00100406	2.62105	0.0344243	-0.924277	0.0903904
ENSG00000122218	COPA	COPI coat complex subunit alpha [Source:HGNC Symbol;Acc:HGNC:2230]	214.333	460	913	0.670374	0.00524698	1.41984	6.25311e-08	0.785833	3.08086e-17
ENSG00000106789	CORO2A	coronin 2A [Source:HGNC Symbol;Acc:HGNC:2255]	4	16	33	1.40766	0.0428825	2.19226	0.000355844	0.837362	0.0269008
ENSG00000205105	COX17P1	COX17 pseudogene 1 [Source:HGNC Symbol;Acc:HGNC:24341]	44	98.3333	298.333	0.670294	0.0421981	1.9991	6.08489e-11	1.39676	1.27959e-20
ENSG00000126267	COX6B1	cytochrome c oxidase subunit 6B1 [Source:HGNC Symbol;Acc:HGNC:2280]	467.333	1039.67	179.333	0.826624	0.00415255	-1.95236	3.22524e-08	-2.74265	3.37206e-132
ENSG00000109472	CPE	carboxypeptidase E [Source:HGNC Symbol;Acc:HGNC:2303]	46.6667	139.333	53.6667	1.04155	0.000185921	-0.594087	0.0717268	-1.5827	5.83228e-15
ENSG00000137449	CPEB2	cytoplasmic polyadenylation element binding protein 2 [Source:HGNC Symbol;Acc:HGNC:21745]	4.66667	29	59.6667	2.06498	0.000563546	2.83985	8.99454e-08	0.837902	0.00312013
ENSG00000197603	CPLANE1	ciliogenesis and planar polarity effector 1 [Source:HGNC Symbol;Acc:HGNC:25801]	16.3333	22.6667	202	-0.0522871	0.909781	2.82888	3.82889e-15	2.95624	9.15834e-33
ENSG00000178773	CPNE7	copine 7 [Source:HGNC Symbol;Acc:HGNC:2320]	3.33333	15	62	1.58647	0.0318927	3.38396	7.64235e-09	1.84464	2.82365e-08
ENSG00000021826	CPS1	carbamoyl-phosphate synthase 1 [Source:HGNC Symbol;Acc:HGNC:2323]	7.33333	32	61	1.64725	0.00376631	2.30516	6.83419e-06	0.733438	0.0108626
ENSG00000071894	CPSF1	cleavage and polyadenylation specific factor 1 [Source:HGNC Symbol;Acc:HGNC:2324]	51.6667	73	400.667	-0.0511935	0.861798	2.14478	2.22881e-18	2.25379	2.52636e-49
ENSG00000205560	CPT1B	carnitine palmitoyltransferase 1B [Source:HGNC Symbol;Acc:HGNC:2329]	8.33333	11.6667	158.667	0.0504563	0.941317	3.47458	8.81158e-16	3.55814	2.23227e-31
ENSG00000224051	CPTP	ceramide-1-phosphate transfer protein [Source:HGNC Symbol;Acc:HGNC:28116]	15.6667	42	40.3333	0.927249	0.0334762	0.615878	0.184997	-0.260771	0.376681
ENSG00000143320	CRABP2	cellular retinoic acid binding protein 2 [Source:HGNC Symbol;Acc:HGNC:2339]	10	57	49.3333	2.03599	1.64058e-05	1.5687	0.00160305	-0.410255	0.10451
ENSG00000130038	CRACR2A	calcium release activated channel regulator 2A [Source:HGNC Symbol;Acc:HGNC:28657]	6.66667	14.6667	81.3333	0.563989	0.385501	2.78324	1.42245e-08	2.27207	1.47546e-12
ENSG00000007545	CRAMP1	cramped chromatin regulator homolog 1 [Source:HGNC Symbol;Acc:HGNC:14122]	34	45	480.333	-0.0857755	0.821609	3.04171	1.73689e-27	3.20907	1.16713e-78
ENSG00000005339	CREBBP	CREB binding protein [Source:HGNC Symbol;Acc:HGNC:2348]	98.3333	108	545.333	-0.323165	0.255435	1.74603	9.95969e-12	2.13087	1.34918e-56
ENSG00000184164	CRELD2	cysteine rich with EGF like domains 2 [Source:HGNC Symbol;Acc:HGNC:28150]	128.667	562.667	229.667	1.63747	5.43518e-14	0.101996	0.688738	-1.49549	1.44592e-40
ENSG00000058453	CROCC	ciliary rootlet coiled-coil, rootletin [Source:HGNC Symbol;Acc:HGNC:21299]	11.3333	13	84	-0.314077	0.584374	2.09723	4.85746e-07	2.49114	2.65308e-14
ENSG00000121671	CRY2	cryptochrome circadian regulator 2 [Source:HGNC Symbol;Acc:HGNC:2385]	18	25.3333	128.667	-0.0850668	0.85446	1.9976	3.38995e-09	2.13245	2.80558e-17
ENSG00000116791	CRYZ	crystallin zeta [Source:HGNC Symbol;Acc:HGNC:2419]	12.3333	34.3333	5.66667	1.06297	0.0492074	-1.75821	0.0247996	-2.81702	1.60183e-08
ENSG00000268902	CSAG2	CSAG family member 2 [Source:HGNC Symbol;Acc:HGNC:16847]	0.666667	15.3333	21	3.74294	0.000581427	3.92551	0.000280385	0.2357	0.598575
ENSG00000268916	CSAG3	CSAG family member 3 [Source:HGNC Symbol;Acc:HGNC:26237]	1.66667	12.3333	19.3333	2.37243	0.0108964	2.73301	0.00173835	0.439203	0.336831
ENSG00000184371	CSF1	colony stimulating factor 1 [Source:HGNC Symbol;Acc:HGNC:2432]	5	11.3333	81	0.615709	0.374014	3.19015	1.13754e-10	2.63031	8.4368e-15
ENSG00000133275	CSNK1G2	casein kinase 1 gamma 2 [Source:HGNC Symbol;Acc:HGNC:2455]	137.667	169.333	1389.33	-0.211422	0.358667	2.56948	1.39449e-34	2.83302	1.59741e-167
ENSG00000104218	CSPP1	centrosome and spindle pole associated protein 1 [Source:HGNC Symbol;Acc:HGNC:26193]	38	68.3333	628	0.278314	0.397643	3.22539	1.90255e-37	2.99456	2.93554e-94
ENSG00000175183	CSRP2	cysteine and glycine rich protein 2 [Source:HGNC Symbol;Acc:HGNC:2470]	79.3333	169.333	61.6667	0.619444	0.0229316	-1.08029	0.000949688	-1.66403	1.44268e-18
ENSG00000101439	CST3	cystatin C [Source:HGNC Symbol;Acc:HGNC:2475]	274	583.333	60	0.736083	0.00856761	-2.77584	1.25045e-14	-3.48494	4.07308e-121
ENSG00000178971	CTC1	CST telomere replication complex component 1 [Source:HGNC Symbol;Acc:HGNC:26169]	32.3333	34.3333	179.667	-0.41968	0.291897	1.69871	7.85663e-08	2.18433	1.69454e-24
ENSG00000116761	CTH	cystathionine gamma-lyase [Source:HGNC Symbol;Acc:HGNC:2501]	64.6667	171.667	56	0.754203	0.00936526	-1.10085	0.00023239	-1.81816	1.01272e-21
ENSG00000119326	CTNNAL1	catenin alpha like 1 [Source:HGNC Symbol;Acc:HGNC:2512]	122.333	296	230	0.89131	0.00287514	0.286868	0.396406	-0.566423	9.2214e-06
ENSG00000101160	CTSZ	cathepsin Z [Source:HGNC Symbol;Acc:HGNC:2547]	15.3333	2.66667	2	-3.33615	1.44259e-05	-3.97465	9.03964e-07	-0.637505	0.588318
ENSG00000077063	CTTNBP2	cortactin binding protein 2 [Source:HGNC Symbol;Acc:HGNC:15679]	4.33333	7.33333	63.3333	0.318663	0.719265	3.08551	4.39899e-08	2.90779	2.21324e-12
ENSG00000180891	CUEDC1	CUE domain containing 1 [Source:HGNC Symbol;Acc:HGNC:31350]	28	44.6667	297.333	0.141734	0.706693	2.61406	8.47533e-19	2.53368	2.73694e-43
ENSG00000055130	CUL1	cullin 1 [Source:HGNC Symbol;Acc:HGNC:2551]	105	146	950	-0.149097	0.567643	2.31877	6.96306e-27	2.49842	1.64e-107
ENSG00000044090	CUL7	cullin 7 [Source:HGNC Symbol;Acc:HGNC:21024]	31	42.3333	274.667	0.0410295	0.930723	2.43258	7.80766e-11	2.48899	4.81596e-32
ENSG00000257923	CUX1	cut like homeobox 1 [Source:HGNC Symbol;Acc:HGNC:2557]	73.6667	94	526.333	-0.0571699	0.863814	2.16229	1.91138e-12	2.2834	4.45783e-61
ENSG00000150316	CWC15	CWC15 spliceosome associated protein homolog [Source:HGNC Symbol;Acc:HGNC:26939]	190.667	251	1963.33	0.0220342	0.937964	2.73967	9.73432e-20	2.76129	1.22782e-199
ENSG00000273559	CWC25	CWC25 spliceosome associated protein homolog [Source:HGNC Symbol;Acc:HGNC:25989]	37.3333	38.6667	217.667	-0.350149	0.410277	1.85197	5.97208e-07	2.28334	3.37573e-29
ENSG00000107562	CXCL12	C-X-C motif chemokine ligand 12 [Source:HGNC Symbol;Acc:HGNC:10672]	39	17.3333	5.33333	-1.67397	5.46763e-05	-3.61085	1.77428e-10	-1.90673	0.00115785
ENSG00000100243	CYB5R3	cytochrome b5 reductase 3 [Source:HGNC Symbol;Acc:HGNC:2873]	193.333	410.667	224.333	0.658974	0.00771435	-0.446235	0.136464	-1.07834	9.89771e-19
ENSG00000051523	CYBA	cytochrome b-245 alpha chain [Source:HGNC Symbol;Acc:HGNC:2577]	25	142.333	20.3333	1.7807	3.67336e-06	-1.3085	0.00906814	-3.00218	1.03411e-28
ENSG00000273749	CYFIP1	cytoplasmic FMR1 interacting protein 1 [Source:HGNC Symbol;Acc:HGNC:13759]	39.6667	54.6667	287.667	-0.328722	0.417096	1.87699	8.39244e-09	2.18657	2.97482e-36
ENSG00000138061	CYP1B1	cytochrome P450 family 1 subfamily B member 1 [Source:HGNC Symbol;Acc:HGNC:2597]	1.66667	19.6667	20.3333	3.02924	0.000316487	2.79917	0.00104281	-0.158263	0.697701
ENSG00000003137	CYP26B1	cytochrome P450 family 26 subfamily B member 1 [Source:HGNC Symbol;Acc:HGNC:20581]	3.33333	3.66667	91	-0.697551	0.492882	3.88777	4.48545e-11	4.42751	2.7604e-19
ENSG00000008256	CYTH3	cytohesin 3 [Source:HGNC Symbol;Acc:HGNC:9504]	31	35	275.667	-0.32952	0.398017	2.35214	8.38097e-18	2.76865	7.63196e-45
ENSG00000136848	DAB2IP	DAB2 interacting protein [Source:HGNC Symbol;Acc:HGNC:17294]	19	28.6667	314.333	0.0355503	0.939016	3.21845	2.68069e-21	3.2469	1.77702e-55
ENSG00000276644	DACH1	dachshund family transcription factor 1 [Source:HGNC Symbol;Acc:HGNC:2663]	7.66667	47.3333	27.3333	2.10422	1.70317e-05	1.04463	0.0572104	-0.996256	0.000883199
ENSG00000134780	DAGLA	diacylglycerol lipase alpha [Source:HGNC Symbol;Acc:HGNC:1165]	4.66667	14	94.3333	1.15583	0.124042	3.55927	3.20283e-11	2.5423	4.34709e-16
ENSG00000196730	DAPK1	death associated protein kinase 1 [Source:HGNC Symbol;Acc:HGNC:2674]	25.3333	39	227.667	0.102699	0.80561	2.3747	1.37521e-13	2.34726	4.68678e-28
ENSG00000204209	DAXX	death domain associated protein [Source:HGNC Symbol;Acc:HGNC:2681]	24.3333	35.6667	353.667	0.199655	0.705947	3.15373	6.78278e-18	3.10151	6.15361e-57
ENSG00000132716	DCAF8	DDB1 and CUL4 associated factor 8 [Source:HGNC Symbol;Acc:HGNC:24891]	66	93.3333	518	0.0196609	0.946262	2.22622	6.59143e-17	2.26564	2.01867e-58
ENSG00000100523	DDHD1	DDHD domain containing 1 [Source:HGNC Symbol;Acc:HGNC:19714]	18.6667	32	285.333	0.178395	0.680854	3.09314	8.8348e-23	2.95302	8.82321e-48
ENSG00000168209	DDIT4	DNA damage inducible transcript 4 [Source:HGNC Symbol;Acc:HGNC:24944]	68.3333	400.333	222.333	2.07891	7.2993e-16	0.976953	0.000802515	-1.05495	3.26907e-19
ENSG00000181418	DDN	dendrin [Source:HGNC Symbol;Acc:HGNC:24458]	3.66667	7	49	0.514159	0.589397	2.97047	1.65848e-06	2.60616	2.33302e-09
ENSG00000162733	DDR2	discoidin domain receptor tyrosine kinase 2 [Source:HGNC Symbol;Acc:HGNC:2731]	83.6667	233.333	229.333	0.983975	6.0773e-05	0.699898	0.00670269	-0.230952	0.0740581
ENSG00000013573	DDX11	DEAD/H-box helicase 11 [Source:HGNC Symbol;Acc:HGNC:2736]	109.333	169.333	1166.33	0.146212	0.570481	2.67565	3.8594e-26	2.57617	9.56971e-110
ENSG00000089737	DDX24	DEAD-box helicase 24 [Source:HGNC Symbol;Acc:HGNC:13266]	96	126	807	-0.40236	0.22786	2.09302	1.03126e-14	2.47344	4.20994e-96
ENSG00000185163	DDX51	DEAD-box helicase 51 [Source:HGNC Symbol;Acc:HGNC:20082]	14.6667	29.6667	252.667	0.474873	0.298694	3.29877	6.52432e-24	2.88756	2.54814e-42
ENSG00000111364	DDX55	DEAD-box helicase 55 [Source:HGNC Symbol;Acc:HGNC:20085]	100.333	144	931.667	-0.0777666	0.767291	2.37471	9.95608e-31	2.48715	1.62034e-107
ENSG00000143753	DEGS1	delta 4-desaturase, sphingolipid 1 [Source:HGNC Symbol;Acc:HGNC:13709]	140.333	337.667	179.333	0.855377	0.00134235	-0.295938	0.340169	-1.11735	4.48204e-19
ENSG00000175984	DENND2C	DENN domain containing 2C [Source:HGNC Symbol;Acc:HGNC:24748]	16.3333	18	117.667	-0.466886	0.346222	2.00003	1.32908e-08	2.50113	3.4132e-19
ENSG00000105339	DENND3	DENN domain containing 3 [Source:HGNC Symbol;Acc:HGNC:29134]	13	14.3333	130	-0.459311	0.423059	2.46978	8.88693e-11	2.97268	5.27388e-24
ENSG00000198837	DENND4B	DENN domain containing 4B [Source:HGNC Symbol;Acc:HGNC:29044]	33.6667	68	546.667	0.257683	0.516799	3.09569	2.80409e-25	2.80495	7.13537e-78
ENSG00000100150	DEPDC5	DEP domain containing 5, GATOR1 subcomplex subunit [Source:HGNC Symbol;Acc:HGNC:18423]	19.6667	23	173.333	-0.11838	0.832133	2.4467	4.25507e-09	2.70329	1.33591e-28
ENSG00000121644	DESI2	desumoylating isopeptidase 2 [Source:HGNC Symbol;Acc:HGNC:24264]	104.667	223	39.6667	0.603167	0.013693	-2.12056	1.43229e-10	-2.69601	2.32161e-41
ENSG00000128191	DGCR8	DGCR8 microprocessor complex subunit [Source:HGNC Symbol;Acc:HGNC:2847]	42.3333	62.6667	1001.33	0.00986442	0.974892	3.74118	5.12104e-52	3.78934	2.02011e-157
ENSG00000077044	DGKD	diacylglycerol kinase delta [Source:HGNC Symbol;Acc:HGNC:2851]	39.3333	63.3333	354	0.146305	0.641414	2.3631	1.68364e-20	2.27912	5.34367e-46
ENSG00000102780	DGKH	diacylglycerol kinase eta [Source:HGNC Symbol;Acc:HGNC:2854]	26.3333	33	335.667	-0.405018	0.376757	2.75481	3.77192e-17	3.13882	2.51338e-58
ENSG00000145214	DGKQ	diacylglycerol kinase theta [Source:HGNC Symbol;Acc:HGNC:2856]	13.3333	19.6667	179.667	0.0520629	0.922442	2.96243	2.33934e-16	2.99186	4.0018e-31
ENSG00000149091	DGKZ	diacylglycerol kinase zeta [Source:HGNC Symbol;Acc:HGNC:2857]	42	76.6667	498.333	0.108631	0.772025	2.61478	8.99976e-18	2.49295	5.52258e-66
ENSG00000133943	DGLUCY	D-glutamate cyclase [Source:HGNC Symbol;Acc:HGNC:20498]	10	12	76	-0.378707	0.515788	2.06652	1.1508e-06	2.46118	3.96861e-13
ENSG00000172893	DHCR7	7-dehydrocholesterol reductase [Source:HGNC Symbol;Acc:HGNC:2860]	118	239.333	79	0.488683	0.0335254	-1.35125	6.14465e-07	-1.79866	2.74917e-26
ENSG00000134815	DHX34	DExH-box helicase 34 [Source:HGNC Symbol;Acc:HGNC:16719]	47.6667	61.3333	594	-0.221597	0.517918	2.79593	1.50866e-26	3.06547	4.40442e-89
ENSG00000150990	DHX37	DEAH-box helicase 37 [Source:HGNC Symbol;Acc:HGNC:17210]	87	118.333	923	-0.214511	0.464726	2.52319	4.26454e-26	2.75614	2.42575e-117
ENSG00000140829	DHX38	DEAH-box helicase 38 [Source:HGNC Symbol;Acc:HGNC:17211]	83	121.333	633.333	0.00745882	0.977259	2.13727	5.12384e-22	2.17998	1.96893e-62
ENSG00000163214	DHX57	DExH-box helicase 57 [Source:HGNC Symbol;Acc:HGNC:20086]	72	110.667	610.667	0.108955	0.680584	2.30664	8.29485e-20	2.25495	1.09444e-60
ENSG00000067596	DHX8	DEAH-box helicase 8 [Source:HGNC Symbol;Acc:HGNC:2749]	85	94.3333	507	-0.32933	0.251395	1.83733	3.51893e-13	2.22392	3.35257e-57
ENSG00000100697	DICER1	dicer 1, ribonuclease III [Source:HGNC Symbol;Acc:HGNC:17098]	52.6667	76.3333	543.667	0.0178643	0.952992	2.58487	3.4478e-26	2.62952	6.55768e-74
ENSG00000101191	DIDO1	death inducer-obliterator 1 [Source:HGNC Symbol;Acc:HGNC:2680]	58	85.3333	609	0.0132887	0.962453	2.58199	2.41837e-29	2.63011	2.63066e-84
ENSG00000160305	DIP2A	disco interacting protein 2 homolog A [Source:HGNC Symbol;Acc:HGNC:17217]	66.3333	70.6667	430.667	-0.462367	0.101007	1.8842	7.66906e-17	2.40205	4.84656e-58
ENSG00000144535	DIS3L2	DIS3 like 3'-5' exoribonuclease 2 [Source:HGNC Symbol;Acc:HGNC:28648]	22.6667	27.3333	149.333	-0.288741	0.507422	1.90248	1.05303e-09	2.24502	1.84635e-20
ENSG00000075711	DLG1	discs large MAGUK scaffold protein 1 [Source:HGNC Symbol;Acc:HGNC:2900]	37.6667	50.3333	275.667	-0.120473	0.730059	2.07359	4.70905e-11	2.25014	1.19853e-31
ENSG00000151208	DLG5	discs large MAGUK scaffold protein 5 [Source:HGNC Symbol;Acc:HGNC:2904]	50	55	525.333	-0.263249	0.493548	2.70246	5.18299e-17	3.04838	2.19277e-82
ENSG00000198719	DLL1	delta like canonical Notch ligand 1 [Source:HGNC Symbol;Acc:HGNC:2908]	6.66667	8.33333	65.3333	-0.297305	0.687073	2.44778	3.67303e-07	2.76524	1.68073e-12
ENSG00000115844	DLX2	distal-less homeobox 2 [Source:HGNC Symbol;Acc:HGNC:2915]	90.6667	193.333	152.333	0.689882	0.0278552	0.0993255	0.776722	-0.553324	0.000581589
ENSG00000104936	DMPK	DM1 protein kinase [Source:HGNC Symbol;Acc:HGNC:2933]	4.33333	9.33333	104.333	0.532155	0.481597	3.76816	1.32553e-13	3.28017	2.17508e-21
ENSG00000142700	DMRTA2	DMRT like family A2 [Source:HGNC Symbol;Acc:HGNC:13908]	11.6667	4	10	-1.88448	0.0217933	-0.847321	0.249231	1.12318	0.125084
ENSG00000135164	DMTF1	cyclin D binding myb like transcription factor 1 [Source:HGNC Symbol;Acc:HGNC:14603]	53.3333	74	763.333	-0.0661008	0.840726	3.04279	3.26443e-39	3.16532	3.76049e-105
ENSG00000172869	DMXL1	Dmx like 1 [Source:HGNC Symbol;Acc:HGNC:2937]	24.3333	30.3333	178	-0.115633	0.795923	2.12513	6.99097e-10	2.34546	1.24653e-26
ENSG00000104093	DMXL2	Dmx like 2 [Source:HGNC Symbol;Acc:HGNC:2938]	20.3333	28.6667	428	-0.0543325	0.902738	3.5874	3.1017e-35	3.69678	1.58201e-77
ENSG00000138346	DNA2	DNA replication helicase/nuclease 2 [Source:HGNC Symbol;Acc:HGNC:2939]	56.6667	65.6667	390.667	-0.235902	0.48687	2.065	1.34842e-12	2.36803	2.54802e-50
ENSG00000105821	DNAJC2	DnaJ heat shock protein family (Hsp40) member C2 [Source:HGNC Symbol;Acc:HGNC:13192]	99	126.333	1562	-0.0735324	0.810222	3.29211	2.38249e-31	3.42458	1.8715e-213
ENSG00000168724	DNAJC21	DnaJ heat shock protein family (Hsp40) member C21 [Source:HGNC Symbol;Acc:HGNC:27030]	76.6667	101.333	949.667	-0.150805	0.575221	2.8149	2.27381e-41	3.02256	2.40993e-138
ENSG00000102580	DNAJC3	DnaJ heat shock protein family (Hsp40) member C3 [Source:HGNC Symbol;Acc:HGNC:9439]	149.667	302.333	223.333	0.657683	0.0384273	-0.0239067	0.947209	-0.642997	3.53169e-07
ENSG00000213918	DNASE1	deoxyribonuclease 1 [Source:HGNC Symbol;Acc:HGNC:2956]	15	26	168	0.315394	0.513395	2.70384	1.46537e-13	2.48335	1.49586e-25
ENSG00000106976	DNM1	dynamin 1 [Source:HGNC Symbol;Acc:HGNC:2972]	8.33333	15.3333	140.333	0.114312	0.859099	3.14904	1.73186e-11	2.98674	1.06226e-25
ENSG00000079805	DNM2	dynamin 2 [Source:HGNC Symbol;Acc:HGNC:2974]	134.667	160.667	953.667	-0.139292	0.640332	2.1776	6.03354e-13	2.36831	9.8139e-87
ENSG00000107554	DNMBP	dynamin binding protein [Source:HGNC Symbol;Acc:HGNC:30373]	20	23.6667	129.667	-0.428987	0.344135	1.81519	9.87393e-08	2.25052	2.57704e-19
ENSG00000130816	DNMT1	DNA methyltransferase 1 [Source:HGNC Symbol;Acc:HGNC:2976]	354	457.333	2865.67	-0.105484	0.600665	2.3065	2.5496e-26	2.44471	2.49231e-197
ENSG00000067334	DNTTIP2	deoxynucleotidyltransferase terminal interacting protein 2 [Source:HGNC Symbol;Acc:HGNC:24013]	132	180.333	925.667	-0.256744	0.358429	1.89777	1.47432e-16	2.1541	7.75594e-88
ENSG00000088538	DOCK3	dedicator of cytokinesis 3 [Source:HGNC Symbol;Acc:HGNC:2989]	13.6667	15.6667	460.333	-0.263735	0.633777	4.2879	5.26271e-37	4.67244	2.94203e-83
ENSG00000147459	DOCK5	dedicator of cytokinesis 5 [Source:HGNC Symbol;Acc:HGNC:23476]	11.6667	13	184.667	-0.473916	0.398815	3.13995	1.71445e-17	3.62257	4.54175e-36
ENSG00000130158	DOCK6	dedicator of cytokinesis 6 [Source:HGNC Symbol;Acc:HGNC:19189]	24.3333	36.3333	296.667	0.151899	0.733242	2.87341	7.26567e-17	2.82389	8.14607e-49
ENSG00000159147	DONSON	DNA replication fork stabilization factor DONSON [Source:HGNC Symbol;Acc:HGNC:2993]	90.6667	188.333	349	0.602653	0.0328858	1.24324	1.80578e-05	0.686591	8.71081e-08
ENSG00000083097	DOP1A	DOP1 leucine zipper like protein A [Source:HGNC Symbol;Acc:HGNC:21194]	16.6667	26	274	0.136184	0.764385	3.23981	5.26662e-23	3.18909	1.44362e-49
ENSG00000142197	DOP1B	DOP1 leucine zipper like protein B [Source:HGNC Symbol;Acc:HGNC:1291]	6.33333	12	78.6667	0.270903	0.693435	2.78085	2.95552e-09	2.50597	2.49022e-13
ENSG00000104885	DOT1L	DOT1 like histone lysine methyltransferase [Source:HGNC Symbol;Acc:HGNC:24948]	59.6667	74	745	-0.268668	0.380513	2.8156	9.15451e-37	3.1268	1.88842e-112
ENSG00000011332	DPF1	double PHD fingers 1 [Source:HGNC Symbol;Acc:HGNC:20225]	18.6667	31.3333	168.667	0.0837332	0.853796	2.30531	1.06243e-11	2.22708	4.79947e-23
ENSG00000113657	DPYSL3	dihydropyrimidinase like 3 [Source:HGNC Symbol;Acc:HGNC:3015]	1.33333	14.3333	36.6667	2.88038	0.00337505	3.94293	4.08265e-06	1.14177	0.00283938
ENSG00000175550	DRAP1	DR1 associated protein 1 [Source:HGNC Symbol;Acc:HGNC:3019]	126.667	179.667	1027.33	-0.025458	0.925563	2.22548	1.8026e-19	2.29609	7.35148e-21
ENSG00000113360	DROSHA	drosha ribonuclease III [Source:HGNC Symbol;Acc:HGNC:17904]	79.6667	111.667	1205.33	-0.00549308	0.984132	3.16129	1.45765e-39	3.22697	4.66159e-169
ENSG00000134762	DSC3	desmocollin 3 [Source:HGNC Symbol;Acc:HGNC:3037]	30.6667	88	111	1.03475	0.00345338	1.10486	0.00189101	0.130445	0.500202
ENSG00000151914	DST	dystonin [Source:HGNC Symbol;Acc:HGNC:1090]	46.6667	83.6667	620	0.294344	0.334403	2.91917	5.63755e-33	2.68515	5.34351e-87
ENSG00000133059	DSTYK	dual serine/threonine and tyrosine protein kinase [Source:HGNC Symbol;Acc:HGNC:29043]	35	49.3333	285	0.00403103	0.991219	2.25533	1.68107e-13	2.32343	8.65441e-37
ENSG00000143476	DTL	denticleless E3 ubiquitin protein ligase homolog [Source:HGNC Symbol;Acc:HGNC:30288]	98.3333	198	168.333	0.604572	0.0400561	0.125521	0.70363	-0.439824	0.0021286
ENSG00000162999	DUSP19	dual specificity phosphatase 19 [Source:HGNC Symbol;Acc:HGNC:18894]	2.66667	13	1	1.67581	0.0382943	-2.37544	0.086392	-3.90494	0.000109449
ENSG00000158050	DUSP2	dual specificity phosphatase 2 [Source:HGNC Symbol;Acc:HGNC:3068]	0.666667	11.3333	24.3333	3.33252	0.00351905	4.17119	5.55862e-05	0.889467	0.0467136
ENSG00000244306	DUXAP10	double homeobox A pseudogene 10 [Source:NCBI gene (formerly Entrezgene);Acc:503639]	89.6667	132.333	751.333	-0.00125431	0.996014	2.25499	3.47056e-26	2.30229	2.1796e-80
ENSG00000197102	DYNC1H1	dynein cytoplasmic 1 heavy chain 1 [Source:HGNC Symbol;Acc:HGNC:2961]	295.667	338	4511.33	-0.25751	0.276284	3.24302	2.84813e-38	3.53091	6.35174e-275
ENSG00000187240	DYNC2H1	dynein cytoplasmic 2 heavy chain 1 [Source:HGNC Symbol;Acc:HGNC:2962]	76.6667	94.6667	560	-0.131753	0.683522	2.1687	1.87436e-13	2.36068	4.55956e-68
ENSG00000126870	DYNC2I1	dynein 2 intermediate chain 1 [Source:HGNC Symbol;Acc:HGNC:21862]	23.6667	32.6667	166	-0.0391754	0.926603	2.0081	6.80736e-11	2.13588	1.14946e-21
ENSG00000134874	DZIP1	DAZ interacting zinc finger protein 1 [Source:HGNC Symbol;Acc:HGNC:20908]	60.6667	105.667	765.333	0.376938	0.298194	2.9364	4.18873e-23	2.64792	1.07462e-84
ENSG00000158163	DZIP1L	DAZ interacting zinc finger protein 1 like [Source:HGNC Symbol;Acc:HGNC:26551]	7	16.3333	115.667	0.525283	0.40609	3.16284	4.58594e-12	2.61929	7.03795e-20
ENSG00000198919	DZIP3	DAZ interacting zinc finger protein 3 [Source:HGNC Symbol;Acc:HGNC:30938]	61.3333	78.6667	593.333	-0.165363	0.569741	2.47629	6.21457e-26	2.70809	2.05928e-83
ENSG00000104823	ECH1	enoyl-CoA hydratase 1 [Source:HGNC Symbol;Acc:HGNC:3149]	28.6667	72.6667	68.6667	0.968958	0.0252253	0.622629	0.169996	-0.288501	0.189004
ENSG00000136813	ECPAS	Ecm29 proteasome adaptor and scaffold [Source:HGNC Symbol;Acc:HGNC:29020]	267	341	2436.33	-0.199858	0.364618	2.394	1.36849e-29	2.62736	8.18348e-166
ENSG00000131080	EDA2R	ectodysplasin A2 receptor [Source:HGNC Symbol;Acc:HGNC:17756]	11.3333	5	0.333333	-1.6834	0.0326753	-5.78011	2.98856e-05	-4.03362	0.00758691
ENSG00000116406	EDEM3	ER degradation enhancing alpha-mannosidase like protein 3 [Source:HGNC Symbol;Acc:HGNC:16787]	41.3333	101.667	249.333	0.765776	0.00855091	1.79218	7.69401e-12	1.09014	1.00824e-12
ENSG00000101210	EEF1A2	eukaryotic translation elongation factor 1 alpha 2 [Source:HGNC Symbol;Acc:HGNC:3192]	50.3333	264	419	1.79591	2.99176e-09	2.21321	7.66728e-15	0.462763	4.22054e-05
ENSG00000115468	EFHD1	EF-hand domain family member D1 [Source:HGNC Symbol;Acc:HGNC:29556]	17.3333	50	8	1.04219	0.0129433	-1.81677	0.00287061	-2.8413	4.5783e-12
ENSG00000169242	EFNA1	ephrin A1 [Source:HGNC Symbol;Acc:HGNC:3221]	4	17.6667	24	1.57933	0.0230723	1.75774	0.0074801	0.242548	0.544352
ENSG00000084710	EFR3B	EFR3 homolog B [Source:HGNC Symbol;Acc:HGNC:29155]	2.33333	13.6667	36.3333	2.05009	0.018424	3.17124	1.45426e-05	1.20529	0.00243658
ENSG00000125977	EIF2S2	eukaryotic translation initiation factor 2 subunit beta [Source:HGNC Symbol;Acc:HGNC:3266]	661	922	5858.67	0.0897108	0.705894	2.52245	1.0731e-19	2.46292	2.6457e-219
ENSG00000128692	EIF2S2P4	eukaryotic translation initiation factor 2 subunit 2 beta pseudogene 4 [Source:HGNC Symbol;Acc:HGNC:37626]	130	184.667	946.333	-0.485998	0.206662	1.71104	4.47945e-07	2.15083	4.41664e-79
ENSG00000179523	EIF3J-DT	EIF3J divergent transcript [Source:HGNC Symbol;Acc:HGNC:48616]	4	18.6667	18.3333	1.75304	0.0137634	1.45778	0.0578879	-0.237803	0.583775
ENSG00000114867	EIF4G1	eukaryotic translation initiation factor 4 gamma 1 [Source:HGNC Symbol;Acc:HGNC:3296]	389.333	651.667	4961	0.408224	0.152607	3.09541	1.97977e-21	2.72424	7.04475e-306
ENSG00000102034	ELF4	E74 like ETS transcription factor 4 [Source:HGNC Symbol;Acc:HGNC:3319]	21.3333	54	54	0.938486	0.0470172	0.684608	0.152303	-0.201644	0.439073
ENSG00000115459	ELMOD3	ELMO domain containing 3 [Source:HGNC Symbol;Acc:HGNC:26158]	16.6667	33	190.333	0.48616	0.298231	2.7345	6.83239e-13	2.32127	5.991e-27
ENSG00000070061	ELP1	elongator complex protein 1 [Source:HGNC Symbol;Acc:HGNC:5959]	82.3333	168.333	670.667	0.654484	0.0459731	2.37564	8.7549e-14	1.78907	6.16047e-53
ENSG00000165521	EML5	EMAP like 5 [Source:HGNC Symbol;Acc:HGNC:18197]	9.66667	10.6667	71	-0.372882	0.558199	2.07387	1.29873e-06	2.52996	1.75993e-12
ENSG00000214595	EML6	EMAP like 6 [Source:HGNC Symbol;Acc:HGNC:35412]	3.33333	3.66667	94	-0.701917	0.483565	3.93684	2.2052e-11	4.47559	8.15075e-20
ENSG00000154380	ENAH	ENAH actin regulator [Source:HGNC Symbol;Acc:HGNC:18271]	226.333	455.333	351.333	0.626019	0.020056	0.0152539	0.961311	-0.578314	4.19964e-08
ENSG00000197217	ENTPD4	ectonucleoside triphosphate diphosphohydrolase 4 [Source:HGNC Symbol;Acc:HGNC:14573]	22	34	187	0.181195	0.682022	2.32978	1.52248e-11	2.25199	2.12591e-26
ENSG00000100393	EP300	E1A binding protein p300 [Source:HGNC Symbol;Acc:HGNC:3373]	26.6667	50	415.667	0.429226	0.259911	3.19496	1.13867e-26	2.85095	3.86789e-67
ENSG00000183495	EP400	E1A binding protein p400 [Source:HGNC Symbol;Acc:HGNC:11958]	57	70	868	-0.107066	0.763159	3.22966	1.42087e-26	3.42337	6.2194e-133
ENSG00000120616	EPC1	enhancer of polycomb homolog 1 [Source:HGNC Symbol;Acc:HGNC:19876]	32	47.3333	297.333	0.0405827	0.906523	2.41896	4.24631e-18	2.44703	2.35084e-42
ENSG00000086289	EPDR1	ependymin related 1 [Source:HGNC Symbol;Acc:HGNC:17572]	2	28.3333	6.33333	3.2909	1.57685e-05	0.894872	0.39285	-2.36425	2.02179e-06
ENSG00000152223	EPG5	ectopic P-granules autophagy protein 5 homolog [Source:HGNC Symbol;Acc:HGNC:29331]	18	18.3333	240.333	-0.524736	0.254381	2.91773	4.18665e-21	3.50554	4.70576e-47
ENSG00000044524	EPHA3	EPH receptor A3 [Source:HGNC Symbol;Acc:HGNC:3387]	4	17.3333	20.3333	1.51527	0.0304395	1.47222	0.0395066	0.0252848	0.952666
ENSG00000116106	EPHA4	EPH receptor A4 [Source:HGNC Symbol;Acc:HGNC:3388]	6	17.3333	95.3333	1.0497	0.112162	3.20205	3.30585e-11	2.25628	1.23684e-14
ENSG00000196411	EPHB4	EPH receptor B4 [Source:HGNC Symbol;Acc:HGNC:3395]	89	94	623.333	-0.360856	0.227362	2.10843	1.18289e-13	2.52229	1.60194e-77
ENSG00000136628	EPRS1	glutamyl-prolyl-tRNA synthetase 1 [Source:HGNC Symbol;Acc:HGNC:3418]	326.667	686.333	1147	0.622324	0.00378734	1.1305	3.18956e-06	0.538437	1.55496e-09
ENSG00000164307	ERAP1	endoplasmic reticulum aminopeptidase 1 [Source:HGNC Symbol;Acc:HGNC:18173]	15	39.6667	31.6667	0.882729	0.0382026	0.288148	0.518503	-0.52922	0.079782
ENSG00000163161	ERCC3	ERCC excision repair 3, TFIIH core complex helicase subunit [Source:HGNC Symbol;Acc:HGNC:3435]	120	163.333	1774	-0.0516097	0.83082	3.13064	1.58122e-41	3.23306	7.87805e-184
ENSG00000178752	ERFE	erythroferrone [Source:HGNC Symbol;Acc:HGNC:26727]	36	89.6667	106	0.871025	0.0138086	0.835728	0.0185479	0.030872	0.873165
ENSG00000130023	ERMARD	ER membrane associated RNA degradation [Source:HGNC Symbol;Acc:HGNC:21056]	13.6667	14	95.6667	-0.378812	0.546722	2.0699	1.85828e-06	2.57277	2.23435e-16
ENSG00000086619	ERO1B	endoplasmic reticulum oxidoreductase 1 beta [Source:HGNC Symbol;Acc:HGNC:14355]	59.3333	145	105.667	0.672647	0.0222205	-0.0219297	0.942233	-0.653352	0.000426735
ENSG00000072840	EVC	EvC ciliary complex subunit 1 [Source:HGNC Symbol;Acc:HGNC:3497]	4.66667	6.33333	73.3333	-0.133085	0.869765	3.13497	2.35349e-09	3.32214	1.69623e-15
ENSG00000180104	EXOC3	exocyst complex component 3 [Source:HGNC Symbol;Acc:HGNC:30378]	42	55	392.333	-0.160458	0.617167	2.40812	1.20614e-22	2.62919	8.33801e-59
ENSG00000171824	EXOSC10	exosome component 10 [Source:HGNC Symbol;Acc:HGNC:9138]	201	260	1534.67	-0.0257403	0.923652	2.29397	2.95638e-15	2.35519	5.93564e-129
ENSG00000077348	EXOSC5	exosome component 5 [Source:HGNC Symbol;Acc:HGNC:24662]	109	255.667	75.6667	0.736381	0.00204713	-1.25977	3.34335e-05	-1.96252	6.61175e-31
ENSG00000104313	EYA1	EYA transcriptional coactivator and phosphatase 1 [Source:HGNC Symbol;Acc:HGNC:3519]	0.666667	22.3333	16.3333	4.27172	2.70185e-05	3.57185	0.00102514	-0.652389	0.111372
ENSG00000106462	EZH2	enhancer of zeste 2 polycomb repressive complex 2 subunit [Source:HGNC Symbol;Acc:HGNC:3527]	108	155.333	868	-0.0257336	0.914618	2.20605	9.59993e-27	2.27947	4.55521e-88
ENSG00000158769	F11R	F11 receptor [Source:HGNC Symbol;Acc:HGNC:14685]	17.3333	50.6667	13.6667	1.07232	0.0124466	-1.04716	0.0686139	-2.09601	4.4153e-09
ENSG00000185504	FAAP100	FA core complex associated protein 100 [Source:HGNC Symbol;Acc:HGNC:26171]	79.6667	90.3333	657.333	-1.52773	0.0917248	1.27622	0.0250615	2.66016	4.81805e-85
ENSG00000170231	FABP6	fatty acid binding protein 6 [Source:HGNC Symbol;Acc:HGNC:3561]	26.3333	1.33333	1.33333	-4.80409	2.174e-08	-5.0651	6.6258e-09	-0.23336	0.8825
ENSG00000268350	FAM156A	family with sequence similarity 156 member A [Source:HGNC Symbol;Acc:HGNC:30114]	14.6667	19.6667	186.667	-0.061094	0.905553	2.88024	1.40637e-15	3.04033	2.72155e-34
ENSG00000179304	FAM156B	family with sequence similarity 156 member B [Source:HGNC Symbol;Acc:HGNC:31962]	15.6667	19.6667	197	-0.136	0.793201	2.86924	1.21043e-16	3.11855	4.15271e-36
ENSG00000158863	FAM160B2	family with sequence similarity 160 member B2 [Source:HGNC Symbol;Acc:HGNC:16492]	19.3333	28.3333	193	0.0160674	0.970036	2.51465	7.27387e-15	2.56455	5.12801e-31
ENSG00000111879	FAM184A	family with sequence similarity 184 member A [Source:HGNC Symbol;Acc:HGNC:20991]	21.6667	31.6667	204	0.0484342	0.907363	2.45304	1.76342e-14	2.48503	6.82879e-31
ENSG00000125386	FAM193A	family with sequence similarity 193 member A [Source:HGNC Symbol;Acc:HGNC:16822]	27.6667	33	326.667	-0.165478	0.716617	2.82925	1.02196e-17	3.10512	7.78953e-56
ENSG00000146067	FAM193B	family with sequence similarity 193 member B [Source:HGNC Symbol;Acc:HGNC:25524]	23	36.3333	229.333	0.00584116	0.989097	2.43671	1.30862e-12	2.4568	2.72013e-32
ENSG00000184949	FAM227A	family with sequence similarity 227 member A [Source:HGNC Symbol;Acc:HGNC:44197]	5.33333	7.33333	109.333	-0.272791	0.727725	3.49049	7.45607e-13	3.69369	1.08184e-22
ENSG00000105058	FAM32A	family with sequence similarity 32 member A [Source:HGNC Symbol;Acc:HGNC:24563]	137	203.667	1147	0.27611	0.44611	2.51125	3.29448e-11	2.28536	8.90372e-98
ENSG00000189319	FAM53B	family with sequence similarity 53 member B [Source:HGNC Symbol;Acc:HGNC:28968]	48.6667	53	438	-0.363008	0.320738	2.419	1.14702e-16	2.84802	3.81058e-62
ENSG00000188522	FAM83G	family with sequence similarity 83 member G [Source:HGNC Symbol;Acc:HGNC:32554]	23.3333	30	197	-0.433498	0.355326	2.1061	6.94194e-09	2.50822	4.99089e-31
ENSG00000198690	FAN1	FANCD2 and FANCI associated nuclease 1 [Source:HGNC Symbol;Acc:HGNC:29170]	17.3333	23	251	0.00351066	0.994844	3.12192	2.18527e-16	3.24411	3.07032e-45
ENSG00000144554	FANCD2	FA complementation group D2 [Source:HGNC Symbol;Acc:HGNC:3585]	84.6667	150.667	981.667	0.261905	0.296699	2.71534	4.30402e-39	2.50105	9.41633e-112
ENSG00000187790	FANCM	FA complementation group M [Source:HGNC Symbol;Acc:HGNC:23168]	19.3333	32.3333	216.667	0.261881	0.553953	2.71033	1.80946e-14	2.53739	6.5132e-31
ENSG00000169710	FASN	fatty acid synthase [Source:HGNC Symbol;Acc:HGNC:3594]	235.667	400.667	4276.67	0.201021	0.31027	3.3734	3.57999e-82	3.21271	0
ENSG00000083857	FAT1	FAT atypical cadherin 1 [Source:HGNC Symbol;Acc:HGNC:3595]	20.3333	50.3333	362.667	0.850885	0.040437	3.39742	4.91475e-25	2.64585	4.14366e-54
ENSG00000188878	FBF1	Fas binding factor 1 [Source:HGNC Symbol;Acc:HGNC:24674]	32.6667	50.3333	615	0.1276	0.724877	3.45901	7.84662e-37	3.40773	1.76644e-103
ENSG00000188573	FBLL1	fibrillarin like 1 [Source:HGNC Symbol;Acc:HGNC:35458]	8	27	12.3333	1.28907	0.0381714	-0.0711072	0.924314	-1.32703	0.00221819
ENSG00000077942	FBLN1	fibulin 1 [Source:HGNC Symbol;Acc:HGNC:3600]	66	161.333	95	0.687393	0.0113471	-0.325302	0.238971	-0.965736	1.78435e-08
ENSG00000166147	FBN1	fibrillin 1 [Source:HGNC Symbol;Acc:HGNC:3603]	16	17.6667	130	-0.422717	0.376917	2.19527	3.43875e-10	2.67521	2.286e-22
ENSG00000127585	FBXL16	F-box and leucine rich repeat protein 16 [Source:HGNC Symbol;Acc:HGNC:14150]	6	30.6667	62.3333	1.87093	0.00128091	2.59759	4.2596e-07	0.818264	0.0030159
ENSG00000147912	FBXO10	F-box protein 10 [Source:HGNC Symbol;Acc:HGNC:13589]	15.6667	31.6667	229	0.569823	0.242955	3.11202	1.66488e-16	2.65081	4.58472e-34
ENSG00000103264	FBXO31	F-box protein 31 [Source:HGNC Symbol;Acc:HGNC:16510]	43.6667	52	319	-0.238852	0.488363	2.10591	3.67637e-14	2.41271	7.53105e-43
ENSG00000145868	FBXO38	F-box protein 38 [Source:HGNC Symbol;Acc:HGNC:28844]	27	29.3333	176.333	-0.751466	0.117188	1.68685	8.73627e-06	2.38506	6.87974e-26
ENSG00000163013	FBXO41	F-box protein 41 [Source:HGNC Symbol;Acc:HGNC:29409]	5.33333	10	134	0.421675	0.602705	3.85052	2.64265e-15	3.53889	9.91644e-27
ENSG00000109670	FBXW7	F-box and WD repeat domain containing 7 [Source:HGNC Symbol;Acc:HGNC:16712]	57	58.6667	424	-0.476914	0.121944	2.10469	1.13623e-16	2.6461	6.25148e-61
ENSG00000157353	FCSK	fucose kinase [Source:HGNC Symbol;Acc:HGNC:29500]	13.6667	22	158.667	-0.0340038	0.949439	2.6379	2.49251e-12	2.64498	3.30912e-26
ENSG00000079459	FDFT1	farnesyl-diphosphate farnesyltransferase 1 [Source:HGNC Symbol;Acc:HGNC:3629]	97.6667	200.667	133.667	0.504829	0.0367269	-0.330135	0.189886	-0.78928	4.58338e-07
ENSG00000160752	FDPS	farnesyl diphosphate synthase [Source:HGNC Symbol;Acc:HGNC:3631]	236	531	573.667	0.724495	0.00170403	0.593716	0.022362	-0.0948382	0.325633
ENSG00000268388	FENDRR	FOXF1 adjacent non-coding developmental regulatory RNA [Source:HGNC Symbol;Acc:HGNC:43894]	2.66667	15	18.6667	1.99487	0.0122176	2.05597	0.0127177	0.122623	0.789822
ENSG00000114279	FGF12	fibroblast growth factor 12 [Source:HGNC Symbol;Acc:HGNC:3668]	1	11.3333	3.66667	2.84493	0.00637074	0.968128	0.477497	-1.83963	0.0100915
ENSG00000077782	FGFR1	fibroblast growth factor receptor 1 [Source:HGNC Symbol;Acc:HGNC:3688]	65	98.3333	566.333	0.158221	0.626465	2.41812	2.63007e-16	2.32348	1.08272e-64
ENSG00000066468	FGFR2	fibroblast growth factor receptor 2 [Source:HGNC Symbol;Acc:HGNC:3689]	33	41.3333	229.333	-0.137623	0.730897	2.04799	6.52849e-11	2.26967	5.40396e-31
ENSG00000068078	FGFR3	fibroblast growth factor receptor 3 [Source:HGNC Symbol;Acc:HGNC:3690]	34.6667	75.6667	425.333	0.554737	0.0937963	2.78963	1.9227e-25	2.28679	3.66028e-54
ENSG00000198855	FICD	FIC domain protein adenylyltransferase [Source:HGNC Symbol;Acc:HGNC:18416]	9.33333	29.3333	29.6667	1.21879	0.0351178	0.957462	0.0983492	-0.194994	0.576562
ENSG00000112367	FIG4	FIG4 phosphoinositide 5-phosphatase [Source:HGNC Symbol;Acc:HGNC:16873]	14	38.3333	53	0.963222	0.0331393	1.15085	0.00781531	0.262558	0.340499
ENSG00000213468	FIRRE	firre intergenic repeating RNA element [Source:HGNC Symbol;Acc:HGNC:49627]	3.33333	11	71.3333	1.09636	0.18285	3.58592	5.65244e-10	2.49511	5.12106e-12
ENSG00000119321	FKBP15	FKBP prolyl isomerase 15 [Source:HGNC Symbol;Acc:HGNC:23397]	34.6667	61	388.333	0.330848	0.352556	2.71414	2.97415e-22	2.46582	3.66038e-53
ENSG00000196924	FLNA	filamin A [Source:HGNC Symbol;Acc:HGNC:3754]	97.3333	250	2379.33	0.817935	0.000805506	3.81757	6.24925e-73	3.04629	1.74445e-175
ENSG00000136068	FLNB	filamin B [Source:HGNC Symbol;Acc:HGNC:3755]	123.667	165	1051.33	-0.0101934	0.970941	2.39634	3.39455e-19	2.46339	5.76286e-109
ENSG00000128591	FLNC	filamin C [Source:HGNC Symbol;Acc:HGNC:3756]	39	49	344.667	-0.535402	0.209447	2.12124	4.83421e-10	2.6105	2.45408e-51
ENSG00000162769	FLVCR1	FLVCR heme transporter 1 [Source:HGNC Symbol;Acc:HGNC:24682]	33.3333	77	131.333	0.739352	0.0412646	1.24829	0.000254438	0.569676	0.00370162
ENSG00000059122	FLYWCH1	FLYWCH-type zinc finger 1 [Source:HGNC Symbol;Acc:HGNC:25404]	45.3333	65.6667	411.333	0.157092	0.693245	2.52588	1.61662e-12	2.44561	1.39237e-52
ENSG00000157827	FMNL2	formin like 2 [Source:HGNC Symbol;Acc:HGNC:18267]	35.3333	38.3333	375.333	-0.424174	0.240816	2.59771	3.14027e-22	3.08483	1.34208e-64
ENSG00000102081	FMR1	FMRP translational regulator 1 [Source:HGNC Symbol;Acc:HGNC:3775]	76.6667	202.333	313.667	0.989753	0.00283096	1.36988	9.80794e-05	0.426126	0.000706563
ENSG00000109920	FNBP4	formin binding protein 4 [Source:HGNC Symbol;Acc:HGNC:19752]	55.3333	60	776.333	-0.438712	0.151144	2.99182	6.19158e-38	3.488	9.30021e-127
ENSG00000251493	FOXD1	forkhead box D1 [Source:HGNC Symbol;Acc:HGNC:3802]	60.6667	152	228	0.704777	0.0165767	1.04169	9.90493e-05	0.377321	0.0104053
ENSG00000280433	FP565260.6	novel protein, similar to trafficking protein particle complex 10 TRAPPC10	23.6667	31.3333	293	-0.169831	0.678643	2.80104	3.83332e-21	3.01886	5.34786e-52
ENSG00000278996	FP671120.4	novel transcript	3.66667	17	14	1.60469	0.0350739	1.07696	0.131574	-0.484624	0.322818
ENSG00000138759	FRAS1	Fraser extracellular matrix complex subunit 1 [Source:HGNC Symbol;Acc:HGNC:19185]	13.3333	21.6667	133.667	0.263589	0.665883	2.57397	4.25884e-10	2.42356	5.63131e-19
ENSG00000149531	FRG1BP	FSHD region gene 1 family member B, pseudogene [Source:HGNC Symbol;Acc:HGNC:15792]	4	5	33.6667	-0.299218	0.734454	2.23698	0.000265868	2.55234	1.0341e-06
ENSG00000151474	FRMD4A	FERM domain containing 4A [Source:HGNC Symbol;Acc:HGNC:25491]	11	17.3333	105.667	0.204349	0.740958	2.48688	3.18964e-09	2.39976	2.28605e-15
ENSG00000075539	FRYL	FRY like transcription coactivator [Source:HGNC Symbol;Acc:HGNC:29127]	19.3333	31.6667	207.667	0.207326	0.624428	2.62941	3.30667e-16	2.50699	8.3389e-32
ENSG00000075618	FSCN1	fascin actin-bundling protein 1 [Source:HGNC Symbol;Acc:HGNC:11148]	30.6667	100.667	136	1.27912	0.000449025	1.44577	0.000106325	0.229172	0.196859
ENSG00000223361	FTH1P10	ferritin heavy chain 1 pseudogene 10 [Source:HGNC Symbol;Acc:HGNC:3980]	285.667	603	484.667	0.681435	0.0124738	0.14	0.659889	-0.51233	1.16521e-05
ENSG00000163820	FYCO1	FYVE and coiled-coil domain autophagy adaptor 1 [Source:HGNC Symbol;Acc:HGNC:14673]	22	24	190.667	-0.542853	0.235968	2.25046	1.38526e-12	2.78941	1.67901e-31
ENSG00000105325	FZR1	fizzy and cell division cycle 20 related 1 [Source:HGNC Symbol;Acc:HGNC:24824]	69	86.6667	448.333	-0.165819	0.57019	1.93963	2.67987e-13	2.16538	2.91648e-48
ENSG00000123689	G0S2	G0/G1 switch 2 [Source:HGNC Symbol;Acc:HGNC:30229]	8.66667	28.6667	6.33333	1.15632	0.0353565	-1.29351	0.0684751	-2.38189	1.64908e-06
ENSG00000160211	G6PD	glucose-6-phosphate dehydrogenase [Source:HGNC Symbol;Acc:HGNC:4057]	21.3333	55.6667	88.3333	0.934737	0.0264142	1.30564	0.000597225	0.459242	0.0412587
ENSG00000099860	GADD45B	growth arrest and DNA damage inducible beta [Source:HGNC Symbol;Acc:HGNC:4096]	12	37.6667	157.333	1.20791	0.0188416	2.94955	4.4907e-13	1.85411	5.42116e-18
ENSG00000178950	GAK	cyclin G associated kinase [Source:HGNC Symbol;Acc:HGNC:4113]	70.3333	96	673.667	0.0669692	0.849065	2.60513	1.02188e-15	2.60879	3.58009e-85
ENSG00000069482	GAL	galanin and GMAP prepropeptide [Source:HGNC Symbol;Acc:HGNC:4114]	81.6667	250.667	153.333	1.24519	0.000139094	0.307155	0.422527	-0.910524	2.39038e-10
ENSG00000144278	GALNT13	polypeptide N-acetylgalactosaminyltransferase 13 [Source:HGNC Symbol;Acc:HGNC:23242]	7.33333	34	34.3333	1.76845	0.00242406	1.50334	0.00939252	-0.192085	0.541339
ENSG00000143641	GALNT2	polypeptide N-acetylgalactosaminyltransferase 2 [Source:HGNC Symbol;Acc:HGNC:4124]	81.3333	183.333	274.333	0.690101	0.00876906	1.0125	0.000156572	0.378347	0.00477412
ENSG00000070610	GBA2	glucosylceramidase beta 2 [Source:HGNC Symbol;Acc:HGNC:18986]	74.3333	83	665.333	-0.332705	0.236424	2.39692	2.30034e-23	2.79566	2.8337e-96
ENSG00000107862	GBF1	golgi brefeldin A resistant guanine nucleotide exchange factor 1 [Source:HGNC Symbol;Acc:HGNC:4181]	111.667	179.333	1382.67	0.207397	0.409889	2.89418	1.36926e-32	2.73905	2.48726e-148
ENSG00000023909	GCLM	glutamate-cysteine ligase modifier subunit [Source:HGNC Symbol;Acc:HGNC:4312]	23.6667	69	15.6667	0.945699	0.0145981	-1.46603	0.00197782	-2.34594	7.40171e-14
ENSG00000089154	GCN1	GCN1 activator of EIF2AK4 [Source:HGNC Symbol;Acc:HGNC:4199]	168	220.333	2372.33	-0.133251	0.549577	3.04884	4.59415e-50	3.22403	4.59236e-220
ENSG00000179409	GEMIN4	gem nuclear organelle associated protein 4 [Source:HGNC Symbol;Acc:HGNC:15717]	93.6667	133	727	-0.0112558	0.964729	2.18188	4.4122e-22	2.24583	8.28888e-76
ENSG00000178295	GEN1	GEN1 Holliday junction 5' flap endonuclease [Source:HGNC Symbol;Acc:HGNC:26881]	16.6667	25.3333	272.667	-0.00909988	0.983918	3.18667	6.06531e-23	3.22563	5.20581e-49
ENSG00000131459	GFPT2	glutamine-fructose-6-phosphate transaminase 2 [Source:HGNC Symbol;Acc:HGNC:4242]	16.6667	21	136.667	-0.326986	0.502258	2.16749	9.83626e-10	2.49802	2.82981e-22
ENSG00000100083	GGA1	golgi associated, gamma adaptin ear containing, ARF binding protein 1 [Source:HGNC Symbol;Acc:HGNC:17842]	153	158.667	802	-1.00151	0.0130015	1.1807	0.00087253	2.1297	6.56143e-72
ENSG00000074047	GLI2	GLI family zinc finger 2 [Source:HGNC Symbol;Acc:HGNC:4318]	7	17	128	0.729629	0.225439	3.37181	4.80482e-15	2.70724	2.33901e-22
ENSG00000089639	GMIP	GEM interacting protein [Source:HGNC Symbol;Acc:HGNC:24852]	7	10.3333	53.6667	0.0212603	0.974871	2.12561	1.03389e-05	2.1721	1.43751e-08
ENSG00000090615	GOLGA3	golgin A3 [Source:HGNC Symbol;Acc:HGNC:4426]	66.3333	101	1086	0.158814	0.61927	3.31705	4.64506e-33	3.22315	1.86659e-150
ENSG00000197978	GOLGA6L9	golgin A6 family like 9 [Source:HGNC Symbol;Acc:HGNC:37229]	4.33333	4.66667	29	-0.703665	0.442364	1.82616	0.00510517	2.44821	1.61092e-05
ENSG00000175265	GOLGA8A	golgin A8 family member A [Source:HGNC Symbol;Acc:HGNC:31972]	8.66667	19.6667	467	0.422969	0.489368	4.86691	1.1638e-34	4.36483	4.26295e-87
ENSG00000215252	GOLGA8B	golgin A8 family member B [Source:HGNC Symbol;Acc:HGNC:31973]	34.3333	46.3333	1857.67	-0.0868501	0.815922	4.95587	2.61823e-79	5.1181	2.02428e-269
ENSG00000173230	GOLGB1	golgin B1 [Source:HGNC Symbol;Acc:HGNC:4429]	53.6667	82.6667	480.667	0.0041201	0.98951	2.31061	9.8384e-22	2.33322	4.27497e-58
ENSG00000111711	GOLT1B	golgi transport 1B [Source:HGNC Symbol;Acc:HGNC:20175]	60	131.333	9.33333	0.671378	0.0269296	-3.35105	1.70906e-11	-4.01492	1.09049e-33
ENSG00000116580	GON4L	gon-4 like [Source:HGNC Symbol;Acc:HGNC:25973]	33.3333	52.6667	607.333	0.117995	0.736264	3.37809	8.31668e-37	3.32064	6.82254e-94
ENSG00000158669	GPAT4	glycerol-3-phosphate acyltransferase 4 [Source:HGNC Symbol;Acc:HGNC:20880]	121	157.333	865.667	-0.176505	0.470385	2.02909	2.71023e-22	2.25292	2.49385e-83
ENSG00000076650	GPATCH1	G-patch domain containing 1 [Source:HGNC Symbol;Acc:HGNC:24658]	13	22.3333	168	0.230979	0.630112	2.87335	4.0908e-16	2.70456	2.12329e-28
ENSG00000092978	GPATCH2	G-patch domain containing 2 [Source:HGNC Symbol;Acc:HGNC:25499]	10.3333	32	29	1.13091	0.020292	0.713768	0.201048	-0.35819	0.301769
ENSG00000183098	GPC6	glypican 6 [Source:HGNC Symbol;Acc:HGNC:4454]	6.33333	71.3333	20.3333	2.99791	1.21397e-09	0.944902	0.13994	-2.01597	6.83403e-12
ENSG00000125772	GPCPD1	glycerophosphocholine phosphodiesterase 1 [Source:HGNC Symbol;Acc:HGNC:26957]	20.3333	54.3333	134.333	0.953443	0.0201589	1.97948	1.29707e-07	1.10184	2.09487e-07
ENSG00000105220	GPI	glucose-6-phosphate isomerase [Source:HGNC Symbol;Acc:HGNC:4458]	191	457.667	326	0.634737	0.00414475	-0.0843079	0.678982	-0.692925	5.31743e-10
ENSG00000150625	GPM6A	glycoprotein M6A [Source:HGNC Symbol;Acc:HGNC:4460]	5.33333	27	2.33333	1.78293	0.00235954	-2.01277	0.0512611	-3.72535	4.22852e-08
ENSG00000158292	GPR153	G protein-coupled receptor 153 [Source:HGNC Symbol;Acc:HGNC:23618]	16.6667	20.3333	112	-0.187749	0.717758	1.97358	2.80529e-07	2.25602	2.14488e-16
ENSG00000115290	GRB14	growth factor receptor bound protein 14 [Source:HGNC Symbol;Acc:HGNC:4565]	11.3333	23.3333	116.667	0.545332	0.286321	2.57384	6.55346e-11	2.11442	2.81919e-16
ENSG00000141449	GREB1L	GREB1 like retinoic acid receptor coactivator [Source:HGNC Symbol;Acc:HGNC:31042]	17	19	262.667	-0.375772	0.448416	3.14529	2.15464e-23	3.58604	9.04482e-50
ENSG00000131149	GSE1	Gse1 coiled-coil protein [Source:HGNC Symbol;Acc:HGNC:28979]	53	83	416.667	0.073003	0.801834	2.14517	7.14998e-20	2.12319	1.79026e-48
ENSG00000077235	GTF3C1	general transcription factor IIIC subunit 1 [Source:HGNC Symbol;Acc:HGNC:4664]	87.3333	136.333	830.667	-0.0333808	0.907947	2.35874	1.21201e-22	2.40661	2.07225e-85
ENSG00000155115	GTF3C6	general transcription factor IIIC subunit 6 [Source:HGNC Symbol;Acc:HGNC:20872]	164.333	295.333	1765	0.379345	0.101934	2.70404	1.36133e-31	2.37488	2.53232e-156
ENSG00000213569	GTF3C6P2	GTF3C6 pseudogene 2 [Source:HGNC Symbol;Acc:HGNC:55024]	6	14	109	0.63986	0.335549	3.35519	4.838e-13	2.75946	1.02124e-19
ENSG00000075218	GTSE1	G2 and S-phase expressed 1 [Source:HGNC Symbol;Acc:HGNC:13698]	62	107.667	655.667	-0.230045	0.597381	2.22978	3.74093e-09	2.40202	3.54699e-81
ENSG00000143774	GUK1	guanylate kinase 1 [Source:HGNC Symbol;Acc:HGNC:4693]	378.667	866.667	376	0.68936	0.000289619	-0.746151	0.000451474	-1.40708	2.9324e-40
ENSG00000187837	H1-2	H1.2 linker histone, cluster member [Source:HGNC Symbol;Acc:HGNC:4716]	14	27.6667	191	0.399591	0.379335	2.93681	3.78297e-18	2.58277	8.22528e-31
ENSG00000250966	H3P14	H3 histone pseudogene 14 [Source:HGNC Symbol;Acc:HGNC:43805]	5.33333	24.3333	1.66667	1.5482	0.014095	-2.64728	0.0084323	-4.06996	1.44318e-07
ENSG00000236534	H3P36	H3 histone pseudogene 36 [Source:HGNC Symbol;Acc:HGNC:42030]	14	56	4.66667	1.55515	0.00297346	-2.20104	0.00842518	-3.78312	3.69506e-15
ENSG00000103253	HAGHL	hydroxyacylglutathione hydrolase like [Source:HGNC Symbol;Acc:HGNC:14177]	15.6667	49.3333	40.3333	1.12505	0.00686095	0.557788	0.1981	-0.499155	0.0653491
ENSG00000249115	HAUS5	HAUS augmin like complex subunit 5 [Source:HGNC Symbol;Acc:HGNC:29130]	63.6667	134	413	0.566501	0.0421786	1.91705	1.58478e-13	1.41283	9.54142e-23
ENSG00000143575	HAX1	HCLS1 associated protein X-1 [Source:HGNC Symbol;Acc:HGNC:16915]	245.667	496.333	629	0.635327	0.0245993	0.743932	0.0214669	0.134989	0.295872
ENSG00000172534	HCFC1	host cell factor C1 [Source:HGNC Symbol;Acc:HGNC:4839]	82.6667	126.333	696	-0.0686024	0.819228	2.18017	3.22331e-19	2.258	1.58374e-78
ENSG00000068024	HDAC4	histone deacetylase 4 [Source:HGNC Symbol;Acc:HGNC:14063]	7.33333	11.3333	57.6667	0.0983388	0.882086	2.15234	9.46722e-06	2.13613	5.04251e-09
ENSG00000184508	HDDC3	HD domain containing 3 [Source:HGNC Symbol;Acc:HGNC:30522]	82.3333	192	82	0.756617	0.00562274	-0.70565	0.0265428	-1.42765	2.48493e-16
ENSG00000167674	HDGFL2	HDGF like 2 [Source:HGNC Symbol;Acc:HGNC:14680]	206	222	1232	-0.27455	0.330629	1.94951	3.28278e-11	2.26644	2.90635e-109
ENSG00000008869	HEATR5B	HEAT repeat containing 5B [Source:HGNC Symbol;Acc:HGNC:29273]	64	89.6667	625.667	-0.0149028	0.958268	2.52241	4.27541e-25	2.59975	1.92892e-83
ENSG00000092148	HECTD1	HECT domain E3 ubiquitin protein ligase 1 [Source:HGNC Symbol;Acc:HGNC:20157]	76.6667	83.6667	734	-0.317287	0.30071	2.53639	3.03773e-21	2.92741	1.79222e-107
ENSG00000138411	HECW2	HECT, C2 and WW domain containing E3 ubiquitin protein ligase 2 [Source:HGNC Symbol;Acc:HGNC:29853]	5	9	58.6667	0.386081	0.626708	2.76936	3.03587e-07	2.49887	1.24945e-10
ENSG00000130589	HELZ2	helicase with zinc finger 2 [Source:HGNC Symbol;Acc:HGNC:30021]	12.3333	22.3333	187.333	0.415675	0.481879	3.16374	8.96987e-15	2.86622	4.71061e-32
ENSG00000103657	HERC1	HECT and RLD domain containing E3 ubiquitin protein ligase family member 1 [Source:HGNC Symbol;Acc:HGNC:4867]	28	30.6667	180.667	-0.363758	0.360436	1.91589	3.5002e-09	2.3525	1.36863e-25
ENSG00000128731	HERC2	HECT and RLD domain containing E3 ubiquitin protein ligase 2 [Source:HGNC Symbol;Acc:HGNC:4868]	17	24	236	-0.0675274	0.884549	2.96483	1.59136e-19	3.09238	4.674e-43
ENSG00000164161	HHIP	hedgehog interacting protein [Source:HGNC Symbol;Acc:HGNC:14866]	2	21.3333	19	2.87088	0.000408192	2.4294	0.00474648	-0.374441	0.349801
ENSG00000248890	HHIP-AS1	HHIP antisense RNA 1 [Source:HGNC Symbol;Acc:HGNC:44182]	1.33333	11.6667	9.33333	2.51024	0.0102968	1.95202	0.0605474	-0.51788	0.353046
ENSG00000130787	HIP1R	huntingtin interacting protein 1 related [Source:HGNC Symbol;Acc:HGNC:18415]	15	19.6667	120.667	-0.0946878	0.852203	2.22839	2.81418e-09	2.41434	4.36409e-19
ENSG00000100084	HIRA	histone cell cycle regulator [Source:HGNC Symbol;Acc:HGNC:4916]	49.6667	59.6667	566.667	-0.222041	0.559115	2.75381	3.15006e-22	3.042	2.14496e-21
ENSG00000010818	HIVEP2	HIVEP zinc finger 2 [Source:HGNC Symbol;Acc:HGNC:4921]	10.3333	17	169	0.300443	0.623685	3.26624	7.58466e-16	3.10679	4.8128e-32
ENSG00000226059	HMGB3P20	high mobility group box 3 pseudogene 20 [Source:HGNC Symbol;Acc:HGNC:39312]	16.6667	28.6667	155.333	-0.295649	0.618888	2.0222	3.65204e-05	2.22599	1.35902e-20
ENSG00000198157	HMGN5	high mobility group nucleosome binding domain 5 [Source:HGNC Symbol;Acc:HGNC:8013]	437.667	559	3100.33	-1.32892	0.128945	1.04084	0.192825	2.26533	1.83871e-170
ENSG00000113716	HMGXB3	HMG-box containing 3 [Source:HGNC Symbol;Acc:HGNC:28982]	59.6667	77.6667	1977.33	-0.0603757	0.852535	4.32243	1.39633e-55	4.46216	2.55223e-282
ENSG00000072571	HMMR	hyaluronan mediated motility receptor [Source:HGNC Symbol;Acc:HGNC:5012]	34.6667	85.6667	293.667	0.786185	0.0122841	2.29712	1.05604e-15	1.57571	1.54647e-22
ENSG00000100292	HMOX1	heme oxygenase 1 [Source:HGNC Symbol;Acc:HGNC:5013]	12.3333	36.3333	85.6667	0.969489	0.0348646	1.9426	2.98271e-06	1.02613	9.73104e-05
ENSG00000105323	HNRNPUL1	heterogeneous nuclear ribonucleoprotein U like 1 [Source:HGNC Symbol;Acc:HGNC:17011]	240.333	491.333	1792.33	0.503796	0.010233	2.12097	2.61849e-29	1.66269	1.28879e-92
ENSG00000103942	HOMER2	homer scaffold protein 2 [Source:HGNC Symbol;Acc:HGNC:17513]	42.6667	102	623.333	0.73979	0.0122783	3.07619	2.76653e-33	2.40486	1.01761e-76
ENSG00000005073	HOXA11	homeobox A11 [Source:HGNC Symbol;Acc:HGNC:5101]	28.3333	53	346	0.404944	0.27153	2.8281	1.49776e-22	2.5022	5.00677e-50
ENSG00000240990	HOXA11-AS	HOXA11 antisense RNA [Source:HGNC Symbol;Acc:HGNC:24957]	23	55.6667	78.6667	0.735926	0.0438726	0.975688	0.00541755	0.29991	0.195936
ENSG00000106031	HOXA13	homeobox A13 [Source:HGNC Symbol;Acc:HGNC:5102]	24.6667	62.6667	27.3333	0.82641	0.018792	-0.62819	0.139722	-1.40071	9.50989e-07
ENSG00000197576	HOXA4	homeobox A4 [Source:HGNC Symbol;Acc:HGNC:5105]	5.66667	11.3333	56.6667	0.550139	0.468652	2.55694	2.33274e-06	2.11919	1.01477e-08
ENSG00000120075	HOXB5	homeobox B5 [Source:HGNC Symbol;Acc:HGNC:5116]	12	14.6667	104.667	-0.178763	0.758192	2.35353	1.25834e-08	2.63157	5.03733e-18
ENSG00000128709	HOXD9	homeobox D9 [Source:HGNC Symbol;Acc:HGNC:5140]	10	20	130.667	0.457912	0.399924	2.88892	4.83691e-13	2.50111	5.89146e-21
ENSG00000237380	HOXD-AS2	HOXD cluster antisense RNA 2 [Source:HGNC Symbol;Acc:HGNC:43756]	12.6667	35.6667	4	0.991074	0.0344165	-2.40371	0.00105369	-3.36594	5.00128e-10
ENSG00000080824	HSP90AA1	heat shock protein 90 alpha family class A member 1 [Source:HGNC Symbol;Acc:HGNC:5253]	2620.33	3524.33	47713.3	-0.498822	0.119119	3.09053	1.29632e-27	3.55228	0
ENSG00000224411	HSP90AA2P	heat shock protein 90 alpha family class A member 2, pseudogene [Source:HGNC Symbol;Acc:HGNC:5256]	299.667	415.667	4835.67	-0.248683	0.348315	3.09322	2.35258e-46	3.33692	0
ENSG00000231434	HSP90AA3P	heat shock protein 90 alpha family class A member 3, pseudogene [Source:HGNC Symbol;Acc:HGNC:5254]	165.333	242	2522.67	-0.0619124	0.795252	3.09227	3.97629e-57	3.17861	4.31982e-249
ENSG00000205100	HSP90AA4P	heat shock protein 90 alpha family class A member 4, pseudogene [Source:HGNC Symbol;Acc:HGNC:5255]	5	5.66667	83	-0.371437	0.646014	3.22814	6.72474e-11	3.66617	4.93322e-18
ENSG00000204388	HSPA1B	heat shock protein family A (Hsp70) member 1B [Source:HGNC Symbol;Acc:HGNC:5233]	37.3333	55.6667	500.333	-0.0321247	0.929218	2.90797	2.53835e-27	2.96398	6.17345e-75
ENSG00000044574	HSPA5	heat shock protein family A (Hsp70) member 5 [Source:HGNC Symbol;Acc:HGNC:5238]	2488.67	7082.67	8083.33	1.19601	1.99519e-05	1.1369	0.000572983	-0.0159839	0.822826
ENSG00000152137	HSPB8	heat shock protein family B (small) member 8 [Source:HGNC Symbol;Acc:HGNC:30171]	37	17.6667	3.66667	-1.452	0.00349911	-3.96203	1.00716e-08	-2.4769	0.000142455
ENSG00000142798	HSPG2	heparan sulfate proteoglycan 2 [Source:HGNC Symbol;Acc:HGNC:5273]	3.33333	7.33333	67.6667	0.718493	0.438143	3.55711	2.17269e-09	2.998	6.60352e-14
ENSG00000102241	HTATSF1	HIV-1 Tat specific factor 1 [Source:HGNC Symbol;Acc:HGNC:5276]	301	320.667	2797.33	-1.25609	0.00928146	1.73515	0.000112801	2.91754	1.34403e-229
ENSG00000197386	HTT	huntingtin [Source:HGNC Symbol;Acc:HGNC:4851]	92.3333	117.333	993	-0.0992942	0.735548	2.71952	5.79209e-24	2.87715	2.29596e-131
ENSG00000086758	HUWE1	HECT, UBA and WWE domain containing E3 ubiquitin protein ligase 1 [Source:HGNC Symbol;Acc:HGNC:30892]	215	287.667	2549.67	-0.0969461	0.650804	2.80899	2.29878e-45	2.9454	6.32297e-215
ENSG00000149428	HYOU1	hypoxia up-regulated 1 [Source:HGNC Symbol;Acc:HGNC:16931]	138.333	459	325.667	1.31173	5.78417e-07	0.577306	0.0546879	-0.698606	7.07043e-11
ENSG00000138413	IDH1	isocitrate dehydrogenase (NADP(+)) 1 [Source:HGNC Symbol;Acc:HGNC:5382]	21.6667	59	59.6667	0.931018	0.0132826	0.687283	0.0715498	-0.186245	0.445028
ENSG00000182054	IDH2	isocitrate dehydrogenase (NADP(+)) 2 [Source:HGNC Symbol;Acc:HGNC:5383]	110.333	276.667	213.667	0.884851	0.000729088	0.268552	0.357599	-0.576957	5.95311e-06
ENSG00000188483	IER5L	immediate early response 5 like [Source:HGNC Symbol;Acc:HGNC:23679]	2.66667	13.3333	64.3333	1.80064	0.0313057	3.79474	1.19979e-08	2.0669	1.40381e-08
ENSG00000142089	IFITM3	interferon induced transmembrane protein 3 [Source:HGNC Symbol;Acc:HGNC:5414]	74.3333	16.6667	6.66667	-2.58764	1.42949e-09	-4.12723	1.8667e-14	-1.51481	0.00708198
ENSG00000163913	IFT122	intraflagellar transport 122 [Source:HGNC Symbol;Acc:HGNC:13556]	23.6667	28.3333	278	-0.305565	0.452066	2.73027	1.39952e-20	3.08771	1.2782e-48
ENSG00000187535	IFT140	intraflagellar transport 140 [Source:HGNC Symbol;Acc:HGNC:29077]	29	32.6667	177	-0.164853	0.739981	1.96072	2.28754e-06	2.23021	1.23988e-24
ENSG00000138002	IFT172	intraflagellar transport 172 [Source:HGNC Symbol;Acc:HGNC:30391]	36	49.3333	270.333	-0.0604356	0.862129	2.124	2.28081e-14	2.25025	8.79734e-35
ENSG00000118096	IFT46	intraflagellar transport 46 [Source:HGNC Symbol;Acc:HGNC:26146]	49.3333	110	173.667	0.698293	0.027887	1.07664	0.000471645	0.447181	0.00801087
ENSG00000132740	IGHMBP2	immunoglobulin mu DNA binding protein 2 [Source:HGNC Symbol;Acc:HGNC:5542]	34	36.6667	449.333	-0.336684	0.410257	2.97206	3.8508e-23	3.40744	1.4034e-78
ENSG00000211592	IGKC	immunoglobulin kappa constant [Source:HGNC Symbol;Acc:HGNC:5716]	69.3333	6	0	-6.88359		-25.7479		-5.21713	0.000492663
ENSG00000080854	IGSF9B	immunoglobulin superfamily member 9B [Source:HGNC Symbol;Acc:HGNC:32326]	11.6667	15.6667	150	-0.0485509	0.932268	2.90413	1.04272e-13	3.05556	7.48297e-28
ENSG00000104365	IKBKB	inhibitor of nuclear factor kappa B kinase subunit beta [Source:HGNC Symbol;Acc:HGNC:5960]	41.3333	43	321.333	-0.468492	0.169576	2.1531	2.00419e-17	2.6941	6.60637e-51
ENSG00000160712	IL6R	interleukin 6 receptor [Source:HGNC Symbol;Acc:HGNC:6019]	2.33333	13.6667	16.6667	2.04648	0.0204109	2.0647	0.0131429	0.085304	0.858909
ENSG00000143195	ILDR2	immunoglobulin like domain containing receptor 2 [Source:HGNC Symbol;Acc:HGNC:18131]	6.66667	29	48.3333	1.65287	0.00605318	2.10129	7.09818e-05	0.537583	0.078713
ENSG00000129351	ILF3	interleukin enhancer binding factor 3 [Source:HGNC Symbol;Acc:HGNC:6038]	541.333	770.667	7121	-0.0161781	0.927581	2.96102	1.55574e-59	3.0042	1.09469e-305
ENSG00000149503	INCENP	inner centromere protein [Source:HGNC Symbol;Acc:HGNC:6058]	42.6667	45.3333	249	-0.681042	0.0864711	1.58222	4.79625e-07	2.25001	6.12391e-34
ENSG00000139269	INHBE	inhibin subunit beta E [Source:HGNC Symbol;Acc:HGNC:24029]	2	11.3333	1.66667	1.85602	0.0412695	-1.23825	0.344461	-2.9586	0.000735276
ENSG00000128908	INO80	INO80 complex ATPase subunit [Source:HGNC Symbol;Acc:HGNC:26956]	27.3333	39	259	-0.0287091	0.93786	2.43435	1.37982e-17	2.52499	1.21991e-38
ENSG00000040933	INPP4A	inositol polyphosphate-4-phosphatase type I A [Source:HGNC Symbol;Acc:HGNC:6074]	26.3333	33	170	-0.102365	0.815205	1.95888	3.54045e-08	2.15792	6.29298e-23
ENSG00000148384	INPP5E	inositol polyphosphate-5-phosphatase E [Source:HGNC Symbol;Acc:HGNC:21474]	40.3333	83	440.667	0.521851	0.0905047	2.65789	2.58746e-24	2.20331	1.36036e-50
ENSG00000185133	INPP5J	inositol polyphosphate-5-phosphatase J [Source:HGNC Symbol;Acc:HGNC:8956]	12.6667	35.3333	46	1.04203	0.0404463	1.14821	0.0205099	0.175664	0.539977
ENSG00000165458	INPPL1	inositol polyphosphate phosphatase like 1 [Source:HGNC Symbol;Acc:HGNC:6080]	140.667	183.667	1836.33	-0.179392	0.457531	2.89384	3.91027e-38	3.11272	7.92828e-178
ENSG00000186480	INSIG1	insulin induced gene 1 [Source:HGNC Symbol;Acc:HGNC:6083]	203.667	513.667	112	0.895454	0.000189209	-1.53101	3.87084e-07	-2.40089	1.72108e-72
ENSG00000164880	INTS1	integrator complex subunit 1 [Source:HGNC Symbol;Acc:HGNC:24555]	178.333	227.667	1771	-1.07854	0.0347584	1.76569	0.000217222	2.75735	2.10301e-176
ENSG00000108506	INTS2	integrator complex subunit 2 [Source:HGNC Symbol;Acc:HGNC:29241]	47.6667	60	320.667	-0.225165	0.466592	1.93604	1.13386e-14	2.21308	1.19069e-40
ENSG00000143624	INTS3	integrator complex subunit 3 [Source:HGNC Symbol;Acc:HGNC:26153]	24.6667	32.3333	221.333	-0.279984	0.524325	2.27851	1.39037e-12	2.56392	5.05038e-32
ENSG00000165359	INTS6L	integrator complex subunit 6 like [Source:HGNC Symbol;Acc:HGNC:27334]	16	17	349.333	-0.363129	0.495056	3.67109	1.6022e-27	4.15393	3.41226e-66
ENSG00000164066	INTU	inturned planar cell polarity protein [Source:HGNC Symbol;Acc:HGNC:29239]	27	35	200	-0.173838	0.649458	2.07254	9.50086e-12	2.30792	1.56073e-28
ENSG00000119509	INVS	inversin [Source:HGNC Symbol;Acc:HGNC:17870]	15.6667	29.3333	269	0.358084	0.428447	3.28095	2.00495e-23	2.98911	1.60555e-46
ENSG00000117408	IPO13	importin 13 [Source:HGNC Symbol;Acc:HGNC:16853]	55	84.6667	619	0.18968	0.584298	2.78889	2.78313e-20	2.66635	1.72545e-77
ENSG00000160051	IQCC	IQ motif containing C [Source:HGNC Symbol;Acc:HGNC:25545]	30	38.6667	400	-0.322465	0.444308	2.84237	9.03854e-19	3.16432	7.19382e-70
ENSG00000106012	IQCE	IQ motif containing E [Source:HGNC Symbol;Acc:HGNC:29171]	26.3333	36.3333	256.333	-0.11901	0.759605	2.44649	5.62012e-16	2.61542	1.05359e-39
ENSG00000144711	IQSEC1	IQ motif and Sec7 domain ArfGEF 1 [Source:HGNC Symbol;Acc:HGNC:29112]	43.3333	53.3333	408.333	-0.244273	0.459227	2.43249	1.04403e-19	2.73367	4.39871e-60
ENSG00000184216	IRAK1	interleukin 1 receptor associated kinase 1 [Source:HGNC Symbol;Acc:HGNC:6112]	202.333	369	2256	0.527601	0.0874668	2.89963	1.3675e-17	2.40986	1.59889e-148
ENSG00000169047	IRS1	insulin receptor substrate 1 [Source:HGNC Symbol;Acc:HGNC:6125]	4	4.66667	31.3333	-0.228887	0.815605	2.18218	0.000913372	2.53679	1.85167e-06
ENSG00000133124	IRS4	insulin receptor substrate 4 [Source:HGNC Symbol;Acc:HGNC:6128]	434	582.667	6441.33	0.0504323	0.845465	3.28476	1.76172e-28	3.26544	0
ENSG00000005884	ITGA3	integrin subunit alpha 3 [Source:HGNC Symbol;Acc:HGNC:6139]	3.33333	7.33333	48.3333	0.700477	0.464887	3.10784	5.12318e-06	2.52666	1.06946e-08
ENSG00000086544	ITPKC	inositol-trisphosphate 3-kinase C [Source:HGNC Symbol;Acc:HGNC:14897]	10	18.6667	146.667	0.477459	0.443558	3.11389	3.73794e-13	2.76593	2.52421e-24
ENSG00000150995	ITPR1	inositol 1,4,5-trisphosphate receptor type 1 [Source:HGNC Symbol;Acc:HGNC:6180]	4.66667	5.33333	54.3333	-0.364457	0.670249	2.71129	4.4964e-07	3.1408	1.38023e-11
ENSG00000123104	ITPR2	inositol 1,4,5-trisphosphate receptor type 2 [Source:HGNC Symbol;Acc:HGNC:6181]	12.6667	17	99.6667	-0.111509	0.827382	2.15847	8.93621e-09	2.34267	6.02582e-16
ENSG00000096433	ITPR3	inositol 1,4,5-trisphosphate receptor type 3 [Source:HGNC Symbol;Acc:HGNC:6182]	18	32.3333	329	0.426656	0.395592	3.4507	1.52935e-20	3.13981	1.3683e-56
ENSG00000205726	ITSN1	intersectin 1 [Source:HGNC Symbol;Acc:HGNC:6183]	38.3333	50	283.333	-0.152697	0.665448	2.08828	2.45757e-13	2.29887	1.01117e-37
ENSG00000198399	ITSN2	intersectin 2 [Source:HGNC Symbol;Acc:HGNC:6184]	32.3333	48	248.667	0.103188	0.788508	2.16754	1.92948e-13	2.1621	1.21317e-30
ENSG00000184916	JAG2	jagged canonical Notch ligand 2 [Source:HGNC Symbol;Acc:HGNC:6189]	21.3333	52.6667	341.333	0.886731	0.0546478	3.28114	4.04698e-18	2.49411	4.14915e-47
ENSG00000162434	JAK1	Janus kinase 1 [Source:HGNC Symbol;Acc:HGNC:6190]	73.3333	104.667	637.667	0.0504854	0.861682	2.39087	1.53848e-19	2.40339	2.40252e-78
ENSG00000171988	JMJD1C	jumonji domain containing 1C [Source:HGNC Symbol;Acc:HGNC:12313]	26.6667	38	235	-0.0398492	0.917757	2.33028	2.17819e-15	2.42485	1.569e-32
ENSG00000143543	JTB	jumping translocation breakpoint [Source:HGNC Symbol;Acc:HGNC:6201]	248.667	520.333	167	0.612094	0.00522692	-1.2644	1.84375e-06	-1.84471	1.57242e-54
ENSG00000177606	JUN	Jun proto-oncogene, AP-1 transcription factor subunit [Source:HGNC Symbol;Acc:HGNC:6204]	410	571.333	3113	0.0218748	0.91557	2.23086	3.80505e-22	2.24068	2.88837e-188
ENSG00000171223	JUNB	JunB proto-oncogene, AP-1 transcription factor subunit [Source:HGNC Symbol;Acc:HGNC:6205]	16.6667	19.3333	107	-0.452355	0.361896	1.79388	2.55345e-06	2.26515	6.66602e-16
ENSG00000107104	KANK1	KN motif and ankyrin repeat domains 1 [Source:HGNC Symbol;Acc:HGNC:19309]	15	21	115.667	0.0962331	0.872122	2.23132	1.72944e-07	2.2588	1.25385e-16
ENSG00000232593	KANTR	KDM5C adjacent transcript [Source:HGNC Symbol;Acc:HGNC:49510]	15.3333	25.6667	137	0.233152	0.621571	2.36559	3.12054e-10	2.20767	2.79063e-19
ENSG00000108773	KAT2A	lysine acetyltransferase 2A [Source:HGNC Symbol;Acc:HGNC:4201]	161.667	210.333	1319.67	-0.0503384	0.847526	2.35326	2.78737e-18	2.44458	1.79244e-133
ENSG00000269993	KC877982.1	novel transcript	3.33333	52.6667	14.6667	3.46939	6.94603e-09	1.37265	0.0748135	-2.05162	1.44164e-09
ENSG00000170049	KCNAB3	potassium voltage-gated channel subfamily A regulatory beta subunit 3 [Source:HGNC Symbol;Acc:HGNC:6230]	11	3.66667	20.3333	-2.08043	0.00604027	0.114093	0.837369	2.27233	0.000288492
ENSG00000116396	KCNC4	potassium voltage-gated channel subfamily C member 4 [Source:HGNC Symbol;Acc:HGNC:6236]	12.3333	15.6667	99.3333	-0.196099	0.7245	2.197	2.18009e-08	2.4607	1.46831e-15
ENSG00000182324	KCNJ14	potassium inwardly rectifying channel subfamily J member 14 [Source:HGNC Symbol;Acc:HGNC:6260]	4.33333	8.33333	62.6667	0.36705	0.638365	3.02363	1.92209e-08	2.70155	6.65801e-12
ENSG00000135750	KCNK1	potassium two pore domain channel subfamily K member 1 [Source:HGNC Symbol;Acc:HGNC:6272]	10	31.3333	10.3333	1.19719	0.0247817	-0.633327	0.358256	-1.8067	1.68596e-05
ENSG00000135643	KCNMB4	potassium calcium-activated channel subfamily M regulatory beta subunit 4 [Source:HGNC Symbol;Acc:HGNC:6289]	7	23.6667	8	1.22656	0.0294753	-0.598882	0.406561	-1.76973	0.000263553
ENSG00000178695	KCTD12	potassium channel tetramerization domain containing 12 [Source:HGNC Symbol;Acc:HGNC:14678]	39.3333	193	71.3333	1.71226	1.28789e-09	0.0125545	0.968728	-1.63782	1.15789e-20
ENSG00000100196	KDELR3	KDEL endoplasmic reticulum protein retention receptor 3 [Source:HGNC Symbol;Acc:HGNC:6306]	29.6667	101.333	6.66667	1.2648	0.000800612	-2.90707	5.38705e-07	-4.13431	5.67765e-27
ENSG00000165097	KDM1B	lysine demethylase 1B [Source:HGNC Symbol;Acc:HGNC:21577]	27.6667	65.6667	59.6667	0.708673	0.0337701	0.304447	0.384741	-0.34438	0.142335
ENSG00000173120	KDM2A	lysine demethylase 2A [Source:HGNC Symbol;Acc:HGNC:13606]	91.3333	120	1063.67	-0.291336	0.322689	2.64203	6.00105e-30	2.94207	5.59412e-139
ENSG00000127663	KDM4B	lysine demethylase 4B [Source:HGNC Symbol;Acc:HGNC:29136]	40.6667	50.6667	322	-0.257553	0.450392	2.15342	7.03633e-15	2.46128	3.68558e-46
ENSG00000107077	KDM4C	lysine demethylase 4C [Source:HGNC Symbol;Acc:HGNC:17071]	13.3333	18.3333	122	-0.0207696	0.968182	2.40602	1.32779e-10	2.52563	2.22464e-20
ENSG00000126012	KDM5C	lysine demethylase 5C [Source:HGNC Symbol;Acc:HGNC:11114]	135.333	210	1504.67	0.214207	0.429895	2.80264	3.22878e-24	2.63539	9.11576e-162
ENSG00000147050	KDM6A	lysine demethylase 6A [Source:HGNC Symbol;Acc:HGNC:12637]	29.6667	48.3333	302	0.214331	0.557758	2.5661	2.93645e-19	2.43729	4.39688e-44
ENSG00000132680	KHDC4	KH domain containing 4, pre-mRNA splicing factor [Source:HGNC Symbol;Acc:HGNC:29145]	67.3333	93.6667	563	-0.0419323	0.882961	2.27161	5.03144e-22	2.38236	9.01894e-69
ENSG00000142687	KIAA0319L	KIAA0319 like [Source:HGNC Symbol;Acc:HGNC:30071]	141.667	182.333	1041.67	-0.581894	0.12351	1.76268	1.81391e-07	2.30609	7.77922e-91
ENSG00000100578	KIAA0586	KIAA0586 [Source:HGNC Symbol;Acc:HGNC:19960]	21.6667	29.3333	159.667	-0.0532093	0.89927	2.09764	1.42853e-10	2.23715	7.79075e-23
ENSG00000198920	KIAA0753	KIAA0753 [Source:HGNC Symbol;Acc:HGNC:29110]	30.6667	34	329.333	-0.341257	0.385512	2.6412	9.8978e-18	3.06421	1.53743e-52
ENSG00000196123	KIAA0895L	KIAA0895 like [Source:HGNC Symbol;Acc:HGNC:34408]	19	19.3333	173.333	-0.583682	0.218063	2.33891	2.804e-11	2.95957	5.90052e-31
ENSG00000138688	KIAA1109	KIAA1109 [Source:HGNC Symbol;Acc:HGNC:26953]	22	23.3333	399	-0.404415	0.40207	3.37869	1.06355e-30	3.88566	7.75977e-74
ENSG00000110427	KIAA1549L	KIAA1549 like [Source:HGNC Symbol;Acc:HGNC:24836]	4	5.66667	66.3333	-0.497325	0.593122	3.02954	1.72813e-06	3.34075	2.98671e-14
ENSG00000197892	KIF13B	kinesin family member 13B [Source:HGNC Symbol;Acc:HGNC:14405]	8.33333	8.66667	44	-0.501703	0.482866	1.57972	0.00280884	2.13828	3.11462e-07
ENSG00000118193	KIF14	kinesin family member 14 [Source:HGNC Symbol;Acc:HGNC:19181]	32	69.3333	391.333	0.427819	0.260209	2.71601	4.79074e-19	2.29625	6.90213e-45
ENSG00000163808	KIF15	kinesin family member 15 [Source:HGNC Symbol;Acc:HGNC:17273]	13.6667	17.3333	94.6667	-0.199858	0.697025	1.9724	2.27292e-07	2.24195	1.47036e-14
ENSG00000130294	KIF1A	kinesin family member 1A [Source:HGNC Symbol;Acc:HGNC:888]	41.6667	141	459.667	1.21484	1.97124e-05	2.65695	3.39908e-25	1.5001	3.66699e-28
ENSG00000054523	KIF1B	kinesin family member 1B [Source:HGNC Symbol;Acc:HGNC:16636]	54	70	370.333	-0.113557	0.714286	2.02208	1.78957e-13	2.2006	2.81922e-44
ENSG00000129250	KIF1C	kinesin family member 1C [Source:HGNC Symbol;Acc:HGNC:6317]	109.667	127	856.667	-0.535177	0.0789404	2.0268	1.23418e-16	2.54939	2.17797e-105
ENSG00000112984	KIF20A	kinesin family member 20A [Source:HGNC Symbol;Acc:HGNC:9787]	23	49.6667	269.667	0.653136	0.127899	2.79397	3.56871e-17	2.23869	2.23206e-34
ENSG00000139116	KIF21A	kinesin family member 21A [Source:HGNC Symbol;Acc:HGNC:19349]	24.3333	58	282.333	0.772416	0.0452567	2.77559	2.22427e-17	2.07957	1.53707e-33
ENSG00000186638	KIF24	kinesin family member 24 [Source:HGNC Symbol;Acc:HGNC:19916]	11.3333	13.6667	117.667	-0.234727	0.692032	2.57392	5.28572e-11	2.89928	6.54614e-22
ENSG00000066735	KIF26A	kinesin family member 26A [Source:HGNC Symbol;Acc:HGNC:20226]	32	32.6667	221.667	-0.473493	0.223015	2.01593	3.23135e-11	2.56104	3.66534e-34
ENSG00000165115	KIF27	kinesin family member 27 [Source:HGNC Symbol;Acc:HGNC:18632]	4.33333	4.66667	34.3333	-0.513208	0.579379	2.15488	0.000231045	2.68062	4.34602e-07
ENSG00000155980	KIF5A	kinesin family member 5A [Source:HGNC Symbol;Acc:HGNC:6323]	6.33333	15	88	0.723328	0.27997	2.98764	1.30998e-10	2.3446	8.25947e-14
ENSG00000168280	KIF5C	kinesin family member 5C [Source:HGNC Symbol;Acc:HGNC:6325]	24.3333	44.3333	259.667	-0.175999	0.734263	2.24473	2.44829e-07	2.34597	6.22593e-37
ENSG00000166813	KIF7	kinesin family member 7 [Source:HGNC Symbol;Acc:HGNC:30497]	46.3333	65	776.667	-0.0586602	0.85532	3.26309	9.74454e-39	3.37335	2.83578e-114
ENSG00000167702	KIFC2	kinesin family member C2 [Source:HGNC Symbol;Acc:HGNC:29530]	37.6667	51	353	-0.33307	0.409239	2.26473	2.12911e-12	2.58222	4.76152e-51
ENSG00000157404	KIT	KIT proto-oncogene, receptor tyrosine kinase [Source:HGNC Symbol;Acc:HGNC:6342]	2.66667	20	34.3333	2.28815	0.00202972	2.82756	3.1309e-05	0.580923	0.105766
ENSG00000126214	KLC1	kinesin light chain 1 [Source:HGNC Symbol;Acc:HGNC:6387]	96.6667	114.333	982.333	-0.257659	0.324964	2.57873	2.53154e-29	2.89754	1.87905e-138
ENSG00000102554	KLF5	Kruppel like factor 5 [Source:HGNC Symbol;Acc:HGNC:6349]	19.6667	57.6667	45	1.00656	0.00624523	0.38391	0.319957	-0.562413	0.0291185
ENSG00000104731	KLHDC4	kelch domain containing 4 [Source:HGNC Symbol;Acc:HGNC:25272]	62.6667	69	459.333	-0.654908	0.0707681	1.89596	1.40944e-10	2.52902	2.41212e-59
ENSG00000114648	KLHL18	kelch like family member 18 [Source:HGNC Symbol;Acc:HGNC:29120]	18.6667	27	168	-0.0160999	0.970204	2.35351	2.97995e-12	2.43544	8.09725e-25
ENSG00000119771	KLHL29	kelch like family member 29 [Source:HGNC Symbol;Acc:HGNC:29404]	16.6667	22	199	-0.0501452	0.920644	2.80316	7.59603e-16	2.97149	4.69097e-35
ENSG00000118058	KMT2A	lysine methyltransferase 2A [Source:HGNC Symbol;Acc:HGNC:7132]	112.667	119.667	897	-0.525153	0.043639	2.14775	8.9714e-26	2.70211	1.73458e-115
ENSG00000272333	KMT2B	lysine methyltransferase 2B [Source:HGNC Symbol;Acc:HGNC:15840]	59.6667	78.6667	1166.67	-0.197138	0.503272	3.45045	1.77566e-49	3.68363	9.89811e-170
ENSG00000055609	KMT2C	lysine methyltransferase 2C [Source:HGNC Symbol;Acc:HGNC:13726]	53	81.3333	1124.33	0.142705	0.643976	3.64864	1.89643e-46	3.58353	8.11796e-181
ENSG00000167548	KMT2D	lysine methyltransferase 2D [Source:HGNC Symbol;Acc:HGNC:7133]	33.6667	45	1207	-0.126085	0.734251	4.35002	1.00065e-57	4.53715	5.35836e-196
ENSG00000005483	KMT2E	lysine methyltransferase 2E (inactive) [Source:HGNC Symbol;Acc:HGNC:18541]	50	61.6667	445.333	-0.187671	0.550679	2.38997	1.23103e-19	2.64849	4.32088e-64
ENSG00000183955	KMT5A	lysine methyltransferase 5A [Source:HGNC Symbol;Acc:HGNC:29489]	71	89	456.667	-0.155383	0.614605	1.93438	2.12581e-12	2.14977	2.24983e-47
ENSG00000184445	KNTC1	kinetochore associated 1 [Source:HGNC Symbol;Acc:HGNC:17255]	38	68.3333	691.667	0.448858	0.268608	3.45866	5.13869e-30	3.12923	4.28611e-100
ENSG00000133619	KRBA1	KRAB-A domain containing 1 [Source:HGNC Symbol;Acc:HGNC:22228]	36.6667	40.6667	422.333	-1.02543	0.050672	2.23608	5.33851e-07	3.16896	3.69731e-65
ENSG00000129347	KRI1	KRI1 homolog [Source:HGNC Symbol;Acc:HGNC:25769]	162	174.333	928	-0.519844	0.0352593	1.65663	3.26627e-16	2.20347	2.37335e-89
ENSG00000001631	KRIT1	KRIT1 ankyrin repeat containing [Source:HGNC Symbol;Acc:HGNC:1573]	14.3333	20.6667	104.333	-0.250604	0.647114	1.91841	3.92035e-06	2.13206	5.73823e-15
ENSG00000185513	L3MBTL1	L3MBTL histone methyl-lysine binding protein 1 [Source:HGNC Symbol;Acc:HGNC:15905]	8.33333	10	68.3333	-0.261836	0.683997	2.22452	9.19212e-07	2.5656	2.45184e-12
ENSG00000198945	L3MBTL3	L3MBTL histone methyl-lysine binding protein 3 [Source:HGNC Symbol;Acc:HGNC:23035]	13.3333	19.6667	112	-0.0724102	0.889746	2.20741	4.22018e-09	2.30049	3.7133e-17
ENSG00000053747	LAMA3	laminin subunit alpha 3 [Source:HGNC Symbol;Acc:HGNC:6483]	13.6667	25.3333	200	0.364184	0.439039	3.07204	1.55667e-16	2.78026	3.15974e-31
ENSG00000112769	LAMA4	laminin subunit alpha 4 [Source:HGNC Symbol;Acc:HGNC:6484]	15.3333	41	102.333	0.930451	0.0486195	1.96348	6.33218e-07	1.11944	4.02967e-06
ENSG00000130702	LAMA5	laminin subunit alpha 5 [Source:HGNC Symbol;Acc:HGNC:6485]	8	24.3333	230.667	1.02999	0.0566134	4.01997	1.2145e-24	3.0391	4.35735e-42
ENSG00000091136	LAMB1	laminin subunit beta 1 [Source:HGNC Symbol;Acc:HGNC:6486]	73	78.3333	409	-0.2602	0.482243	1.83943	4.17546e-08	2.17644	1.20475e-47
ENSG00000050555	LAMC3	laminin subunit gamma 3 [Source:HGNC Symbol;Acc:HGNC:6494]	11.6667	22	130.667	0.431149	0.412654	2.68836	2.55593e-12	2.36043	8.47816e-20
ENSG00000174720	LARP7	La ribonucleoprotein 7, transcriptional regulator [Source:HGNC Symbol;Acc:HGNC:24912]	198.667	250.333	1278	-0.220443	0.300684	1.89244	2.57663e-24	2.15118	9.38044e-94
ENSG00000143815	LBR	lamin B receptor [Source:HGNC Symbol;Acc:HGNC:6518]	253	513.667	136	0.511095	0.0115701	-1.64115	7.55954e-12	-2.11965	3.91168e-63
ENSG00000130164	LDLR	low density lipoprotein receptor [Source:HGNC Symbol;Acc:HGNC:6547]	25	56.6667	529.667	0.609756	0.104184	3.57996	1.02484e-35	3.01952	2.06573e-79
ENSG00000167615	LENG8	leukocyte receptor cluster member 8 [Source:HGNC Symbol;Acc:HGNC:15500]	12.3333	17.3333	203	-0.170181	0.751736	3.17381	1.44456e-17	3.34126	1.13093e-38
ENSG00000166477	LEO1	LEO1 homolog, Paf1/RNA polymerase II complex component [Source:HGNC Symbol;Acc:HGNC:30401]	46.3333	65.3333	384	-0.00823815	0.979636	2.26546	4.86991e-18	2.34779	2.12457e-51
ENSG00000116678	LEPR	leptin receptor [Source:HGNC Symbol;Acc:HGNC:6554]	9.33333	31	32	1.26913	0.0332618	1.05493	0.0774479	-0.155727	0.652249
ENSG00000168924	LETM1	leucine zipper and EF-hand containing transmembrane protein 1 [Source:HGNC Symbol;Acc:HGNC:6556]	118.667	159.333	1381.33	0.0931849	0.783675	2.94922	1.45326e-17	2.91051	1.74432e-176
ENSG00000106689	LHX2	LIM homeobox 2 [Source:HGNC Symbol;Acc:HGNC:6594]	3.66667	16.6667	21.6667	1.69928	0.0219843	1.80588	0.0105584	0.177784	0.670944
ENSG00000162624	LHX8	LIM homeobox 8 [Source:HGNC Symbol;Acc:HGNC:28838]	0.666667	10.3333	9	3.19827	0.00559863	2.7331	0.0276436	-0.416519	0.478502
ENSG00000050405	LIMA1	LIM domain and actin binding 1 [Source:HGNC Symbol;Acc:HGNC:24636]	24.3333	59	79	0.706451	0.0468728	0.864799	0.0136085	0.21749	0.340423
ENSG00000136490	LIMD2	LIM domain containing 2 [Source:HGNC Symbol;Acc:HGNC:28142]	29	84.3333	51.3333	0.965131	0.00678788	-0.0210089	0.959877	-0.922335	0.000219798
ENSG00000111052	LIN7A	lin-7 homolog A, crumbs cell polarity complex component [Source:HGNC Symbol;Acc:HGNC:17787]	11	34	14	1.16614	0.0295944	-0.340112	0.611973	-1.48363	0.000123612
ENSG00000179406	LINC00174	long intergenic non-protein coding RNA 174 [Source:HGNC Symbol;Acc:HGNC:27788]	14	22	111.333	-0.144148	0.798069	2.02425	2.18086e-06	2.13275	6.60921e-15
ENSG00000232931	LINC00342	long intergenic non-protein coding RNA 342 [Source:HGNC Symbol;Acc:HGNC:42470]	3.66667	11	155.667	1.11114	0.181053	4.61255	8.44648e-18	3.6247	2.2541e-30
ENSG00000153363	LINC00467	long intergenic non-protein coding RNA 467 [Source:HGNC Symbol;Acc:HGNC:28227]	42	95	205.667	0.680297	0.0347042	1.53779	1.07942e-06	0.908995	5.20244e-07
ENSG00000203930	LINC00632	long intergenic non-protein coding RNA 632 [Source:HGNC Symbol;Acc:HGNC:27865]	13	21.6667	123	-0.128571	0.826703	2.24544	4.34791e-07	2.30276	2.53875e-18
ENSG00000249069	LINC01033	long intergenic non-protein coding RNA 1033 [Source:HGNC Symbol;Acc:HGNC:49019]	10.6667	42	7.66667	1.41081	0.0033429	-1.30078	0.034503	-2.64931	1.83621e-09
ENSG00000249550	LINC01234	long intergenic non-protein coding RNA 1234 [Source:HGNC Symbol;Acc:HGNC:49757]	120.667	42.6667	75.6667	-1.95862	2.15458e-10	-1.39903	1.00684e-06	0.618095	0.0136218
ENSG00000233922	LINC01694	long intergenic non-protein coding RNA 1694 [Source:HGNC Symbol;Acc:HGNC:52481]	64.3333	18.3333	50.6667	-2.43748	1.51132e-10	-1.21368	5.23919e-05	1.25597	0.000156617
ENSG00000223764	LINC02593	long intergenic non-protein coding RNA 2593 [Source:HGNC Symbol;Acc:HGNC:53933]	13.3333	23	341	0.251681	0.595469	3.86136	4.82162e-32	3.68243	4.53924e-65
ENSG00000073350	LLGL2	LLGL scribble cell polarity complex component 2 [Source:HGNC Symbol;Acc:HGNC:6629]	28.3333	42.6667	252	0.160122	0.705858	2.42014	4.57195e-12	2.3538	2.12042e-35
ENSG00000160789	LMNA	lamin A/C [Source:HGNC Symbol;Acc:HGNC:6636]	77.6667	198.333	344.667	0.673479	0.019384	1.24932	4.7284e-07	0.593471	1.58945e-06
ENSG00000136153	LMO7	LIM domain 7 [Source:HGNC Symbol;Acc:HGNC:6646]	7	27.6667	125.667	1.5524	0.0116415	3.40559	1.11579e-12	1.9763	7.88008e-15
ENSG00000136944	LMX1B	LIM homeobox transcription factor 1 beta [Source:HGNC Symbol;Acc:HGNC:6654]	2.66667	12.6667	34	1.61307	0.0556395	2.81092	3.91327e-05	1.21857	0.00337004
ENSG00000234546	LNCTAM34A	long non coding transcriptional activator of miR34a [Source:HGNC Symbol;Acc:HGNC:52548]	14.3333	4	0.333333	-2.37357	0.000575649	-6.1008	4.1115e-06	-3.67465	0.0182178
ENSG00000113083	LOX	lysyl oxidase [Source:HGNC Symbol;Acc:HGNC:6664]	5	23.6667	9.66667	1.74987	0.00580887	0.242306	0.763455	-1.48597	0.00145147
ENSG00000134324	LPIN1	lipin 1 [Source:HGNC Symbol;Acc:HGNC:13345]	25	57.3333	312.667	0.583744	0.118605	2.79488	9.76221e-22	2.24186	8.94238e-38
ENSG00000168672	LRATD2	LRAT domain containing 2 [Source:HGNC Symbol;Acc:HGNC:24166]	143.333	45.6667	20	-2.12012	4.76411e-13	-3.54919	2.396e-18	-1.40696	5.30596e-05
ENSG00000173621	LRFN4	leucine rich repeat and fibronectin type III domain containing 4 [Source:HGNC Symbol;Acc:HGNC:28456]	23.6667	58.3333	235.667	0.76127	0.0508739	2.51627	1.02282e-15	1.8178	1.45196e-20
ENSG00000198799	LRIG2	leucine rich repeats and immunoglobulin like domains 2 [Source:HGNC Symbol;Acc:HGNC:20889]	38.3333	42.6667	402	-0.368952	0.287359	2.58893	5.83676e-23	3.02992	4.94993e-68
ENSG00000123384	LRP1	LDL receptor related protein 1 [Source:HGNC Symbol;Acc:HGNC:6692]	31.3333	39.6667	318.667	-0.155301	0.679217	2.56977	3.61875e-19	2.80077	1.42065e-51
ENSG00000134569	LRP4	LDL receptor related protein 4 [Source:HGNC Symbol;Acc:HGNC:6696]	15.6667	20.6667	129	-0.270845	0.588643	2.16197	2.58954e-09	2.43752	1.58805e-20
ENSG00000162337	LRP5	LDL receptor related protein 5 [Source:HGNC Symbol;Acc:HGNC:6697]	37	48.6667	471	-0.14396	0.673039	2.86449	1.62674e-24	3.06569	1.39278e-68
ENSG00000157193	LRP8	LDL receptor related protein 8 [Source:HGNC Symbol;Acc:HGNC:6700]	23	42.6667	265.667	0.346136	0.372127	2.71578	1.10217e-19	2.43299	3.93111e-39
ENSG00000176681	LRRC37A	leucine rich repeat containing 37A [Source:HGNC Symbol;Acc:HGNC:29069]	5	6.33333	81.3333	-0.0747634	0.93385	3.23877	3.67038e-10	3.47609	3.67121e-17
ENSG00000238083	LRRC37A2	leucine rich repeat containing 37 member A2 [Source:HGNC Symbol;Acc:HGNC:32404]	3.66667	5.33333	79.6667	0.164093	0.872383	3.65745	2.15667e-10	3.69219	3.26429e-17
ENSG00000185158	LRRC37B	leucine rich repeat containing 37B [Source:HGNC Symbol;Acc:HGNC:29070]	24	29	182	-0.199965	0.643451	2.14998	7.23102e-11	2.44293	2.58579e-26
ENSG00000169683	LRRC45	leucine rich repeat containing 45 [Source:HGNC Symbol;Acc:HGNC:28302]	74.6667	97.6667	508.667	-0.541474	0.165686	1.67777	6.93749e-07	2.18117	7.06497e-51
ENSG00000133640	LRRIQ1	leucine rich repeats and IQ motif containing 1 [Source:HGNC Symbol;Acc:HGNC:25708]	4	4.66667	51.3333	-0.523032	0.558323	2.76302	1.42133e-05	3.24288	9.63006e-11
ENSG00000041802	LSG1	large 60S subunit nuclear export GTPase 1 [Source:HGNC Symbol;Acc:HGNC:25652]	17	26.3333	144.667	0.111417	0.809064	2.2862	2.54654e-11	2.2529	1.61491e-20
ENSG00000213903	LTB4R	leukotriene B4 receptor [Source:HGNC Symbol;Acc:HGNC:6713]	6	10	351.333	0.293734	0.694115	5.0752	8.77998e-31	4.92566	4.16552e-61
ENSG00000119681	LTBP2	latent transforming growth factor beta binding protein 2 [Source:HGNC Symbol;Acc:HGNC:6715]	3.66667	4	32.3333	-0.262338	0.818437	2.35403	0.000796631	2.79927	9.57313e-07
ENSG00000198862	LTN1	listerin E3 ubiquitin protein ligase 1 [Source:HGNC Symbol;Acc:HGNC:13082]	9	25.6667	161.333	0.91206	0.083867	3.32437	5.61541e-17	2.44906	6.85088e-25
ENSG00000108848	LUC7L3	LUC7 like 3 pre-mRNA splicing factor [Source:HGNC Symbol;Acc:HGNC:24309]	399.667	440	3424.67	-0.961152	0.0151044	1.8473	2.61382e-07	2.75392	1.54372e-263
ENSG00000144214	LYG1	lysozyme g1 [Source:HGNC Symbol;Acc:HGNC:27014]	5.33333	5.66667	40.6667	-0.307917	0.738436	2.18431	0.000267693	2.64606	7.13009e-08
ENSG00000143353	LYPLAL1	lysophospholipase like 1 [Source:HGNC Symbol;Acc:HGNC:20440]	27	65	17.6667	0.81285	0.0386606	-1.27313	0.0142373	-2.07528	7.98162e-11
ENSG00000099949	LZTR1	leucine zipper like transcription regulator 1 [Source:HGNC Symbol;Acc:HGNC:6742]	44.6667	59.6667	575.667	0.0549627	0.90216	3.02667	7.36633e-16	3.06896	3.96672e-83
ENSG00000127603	MACF1	microtubule actin crosslinking factor 1 [Source:HGNC Symbol;Acc:HGNC:13664]	43.3333	72.3333	484.333	0.359962	0.393603	2.80772	6.80356e-16	2.53731	1.25025e-56
ENSG00000110514	MADD	MAP kinase activating death domain [Source:HGNC Symbol;Acc:HGNC:6766]	52	77	751	0.0436438	0.88519	3.05448	8.28977e-38	3.07763	4.25107e-110
ENSG00000178573	MAF	MAF bZIP transcription factor [Source:HGNC Symbol;Acc:HGNC:6776]	13	83	87.6667	2.19646	4.4236e-07	2.02103	8.70283e-06	-0.120575	0.569621
ENSG00000268606	MAGEA2	MAGE family member A2 [Source:HGNC Symbol;Acc:HGNC:6800]	1	13.3333	11	2.92899	0.00601779	2.436	0.0244086	-0.470979	0.37395
ENSG00000081026	MAGI3	membrane associated guanylate kinase, WW and PDZ domain containing 3 [Source:HGNC Symbol;Acc:HGNC:29647]	16.3333	30	190.333	0.263518	0.551774	2.6983	2.8844e-16	2.46395	9.80123e-29
ENSG00000102158	MAGT1	magnesium transporter 1 [Source:HGNC Symbol;Acc:HGNC:28880]	405.667	1032.67	102.333	0.97032	0.000122394	-2.59652	7.34875e-15	-3.54006	7.16482e-185
ENSG00000147676	MAL2	mal, T cell differentiation protein 2 [Source:HGNC Symbol;Acc:HGNC:13634]	0	14.6667	1.33333	5.18579	0.000111284	1.50794	0.600579	-3.66412	4.21734e-05
ENSG00000111885	MAN1A1	mannosidase alpha class 1A member 1 [Source:HGNC Symbol;Acc:HGNC:6821]	54.3333	142.667	174.667	0.839576	0.00296424	0.862581	0.00141791	0.0834991	0.597049
ENSG00000196547	MAN2A2	mannosidase alpha class 2A member 2 [Source:HGNC Symbol;Acc:HGNC:6825]	46.3333	64	752.667	-0.0114102	0.972136	3.26303	1.14272e-34	3.35023	4.24525e-123
ENSG00000109323	MANBA	mannosidase beta [Source:HGNC Symbol;Acc:HGNC:6831]	33	44.6667	369.667	-0.103947	0.772687	2.67006	7.60039e-23	2.84237	3.94471e-58
ENSG00000166963	MAP1A	microtubule associated protein 1A [Source:HGNC Symbol;Acc:HGNC:6835]	4.66667	10.6667	96.3333	0.716652	0.372571	3.57392	9.45637e-12	2.97238	7.02611e-18
ENSG00000131711	MAP1B	microtubule associated protein 1B [Source:HGNC Symbol;Acc:HGNC:6836]	114.333	238.667	1393.67	0.309338	0.31127	2.67264	1.78405e-28	2.34216	3.50404e-101
ENSG00000130758	MAP3K10	mitogen-activated protein kinase kinase kinase 10 [Source:HGNC Symbol;Acc:HGNC:6849]	17	25.3333	180.667	0.0345062	0.940268	2.58989	2.22225e-14	2.62541	3.40115e-28
ENSG00000006062	MAP3K14	mitogen-activated protein kinase kinase kinase 14 [Source:HGNC Symbol;Acc:HGNC:6853]	5.33333	5.66667	88.6667	-0.477653	0.571643	3.2369	1.83296e-11	3.76582	5.05766e-19
ENSG00000143674	MAP3K21	mitogen-activated protein kinase kinase kinase 21 [Source:HGNC Symbol;Acc:HGNC:29798]	36.6667	61.6667	356.333	0.239287	0.476486	2.4966	1.96482e-20	2.32755	5.68251e-46
ENSG00000198909	MAP3K3	mitogen-activated protein kinase kinase kinase 3 [Source:HGNC Symbol;Acc:HGNC:6855]	48.3333	57.6667	568.667	-0.186045	0.596959	2.8312	1.08512e-21	3.09931	1.78239e-87
ENSG00000085511	MAP3K4	mitogen-activated protein kinase kinase kinase 4 [Source:HGNC Symbol;Acc:HGNC:6856]	20.3333	30.6667	290.667	-0.117137	0.802672	2.93451	8.15819e-19	3.0371	1.08129e-50
ENSG00000197442	MAP3K5	mitogen-activated protein kinase kinase kinase 5 [Source:HGNC Symbol;Acc:HGNC:6857]	7.66667	10	88.6667	-0.0532387	0.942432	2.76568	3.04032e-09	2.94865	4.55549e-17
ENSG00000142733	MAP3K6	mitogen-activated protein kinase kinase kinase 6 [Source:HGNC Symbol;Acc:HGNC:6858]	13.3333	22.6667	172	0.384979	0.511554	2.95285	4.07424e-13	2.71864	6.99453e-29
ENSG00000006432	MAP3K9	mitogen-activated protein kinase kinase kinase 9 [Source:HGNC Symbol;Acc:HGNC:6861]	13	14	86.6667	-0.431055	0.432207	1.92137	6.47137e-07	2.42279	3.80636e-14
ENSG00000047849	MAP4	microtubule associated protein 4 [Source:HGNC Symbol;Acc:HGNC:6862]	189.333	247.667	1259	-0.103488	0.655693	1.99815	1.60713e-19	2.1425	2.51045e-91
ENSG00000116871	MAP7D1	MAP7 domain containing 1 [Source:HGNC Symbol;Acc:HGNC:25514]	106	184.333	1004.33	0.402923	0.184999	2.59598	3.25863e-17	2.24265	1.28445e-93
ENSG00000008735	MAPK8IP2	mitogen-activated protein kinase 8 interacting protein 2 [Source:HGNC Symbol;Acc:HGNC:6883]	59	130.667	153.333	0.600864	0.0248999	0.56893	0.0428551	0.0230184	0.889748
ENSG00000138834	MAPK8IP3	mitogen-activated protein kinase 8 interacting protein 3 [Source:HGNC Symbol;Acc:HGNC:6884]	31.3333	32.6667	1126.67	-0.334184	0.489348	4.46837	1.41312e-37	4.90148	1.93843e-169
ENSG00000137802	MAPKBP1	mitogen-activated protein kinase binding protein 1 [Source:HGNC Symbol;Acc:HGNC:29536]	4	10.3333	119.667	0.934869	0.250572	4.10531	1.35124e-14	3.32113	1.12353e-23
ENSG00000166974	MAPRE2	microtubule associated protein RP/EB family member 2 [Source:HGNC Symbol;Acc:HGNC:6891]	46	104	30.3333	0.677219	0.0239211	-1.35955	0.000185509	-1.98489	3.77141e-16
ENSG00000166783	MARF1	meiosis regulator and mRNA stability factor 1 [Source:HGNC Symbol;Acc:HGNC:29562]	14.6667	23.6667	194	0.295749	0.596125	2.99564	9.20516e-14	2.83004	3.60953e-33
ENSG00000116141	MARK1	microtubule affinity regulating kinase 1 [Source:HGNC Symbol;Acc:HGNC:6896]	10	36	110.667	1.15349	0.030998	2.56139	1.88089e-09	1.41445	3.05425e-09
ENSG00000075413	MARK3	microtubule affinity regulating kinase 3 [Source:HGNC Symbol;Acc:HGNC:6897]	100.333	140	726.333	-0.061569	0.796924	2.0561	1.89534e-23	2.1708	8.44557e-77
ENSG00000086015	MAST2	microtubule associated serine/threonine kinase 2 [Source:HGNC Symbol;Acc:HGNC:19035]	33.3333	42	369	-0.158092	0.669889	2.69691	1.13755e-21	2.93255	1.4103e-60
ENSG00000069020	MAST4	microtubule associated serine/threonine kinase family member 4 [Source:HGNC Symbol;Acc:HGNC:19037]	13.6667	20	127	0.0481975	0.929597	2.42787	4.16596e-09	2.45927	1.13428e-20
ENSG00000258839	MC1R	melanocortin 1 receptor [Source:HGNC Symbol;Acc:HGNC:6929]	3.66667	10	78.3333	0.864846	0.257457	3.58806	1.53541e-10	2.76895	1.1559e-14
ENSG00000065328	MCM10	minichromosome maintenance 10 replication initiation factor [Source:HGNC Symbol;Acc:HGNC:18043]	169.333	206	1079	-0.341908	0.142891	1.82002	1.20596e-20	2.18473	1.7895e-95
ENSG00000160294	MCM3AP	minichromosome maintenance complex component 3 associated protein [Source:HGNC Symbol;Acc:HGNC:6946]	145.333	204.333	1870	-0.00468867	0.983911	2.9357	1.85266e-42	2.99107	4.07512e-210
ENSG00000153898	MCOLN2	mucolipin 2 [Source:HGNC Symbol;Acc:HGNC:13357]	18.6667	27	220.333	0.0390944	0.929843	2.77154	1.45135e-17	2.82345	1.36203e-37
ENSG00000005059	MCUB	mitochondrial calcium uniporter dominant negative subunit beta [Source:HGNC Symbol;Acc:HGNC:26076]	42.6667	97.6667	18.6667	0.631389	0.0429216	-2.01749	6.60629e-07	-2.59636	1.74027e-19
ENSG00000137337	MDC1	mediator of DNA damage checkpoint 1 [Source:HGNC Symbol;Acc:HGNC:21163]	11.6667	17.3333	90.3333	0.0897617	0.868685	2.17197	8.55321e-08	2.17683	1.16518e-13
ENSG00000139915	MDGA2	MAM domain containing glycosylphosphatidylinositol anchor 2 [Source:HGNC Symbol;Acc:HGNC:19835]	0.666667	15.6667	35.6667	3.77049	0.000490697	4.69571	3.73482e-06	0.970241	0.0132084
ENSG00000110492	MDK	midkine [Source:HGNC Symbol;Acc:HGNC:6972]	145.333	401.333	189	0.914633	1.23676e-05	-0.417069	0.0741345	-1.28862	2.17158e-23
ENSG00000112159	MDN1	midasin AAA ATPase 1 [Source:HGNC Symbol;Acc:HGNC:18302]	48.3333	54	566.333	-0.187876	0.666374	2.89625	3.48355e-15	3.18472	5.89564e-94
ENSG00000144893	MED12L	mediator complex subunit 12L [Source:HGNC Symbol;Acc:HGNC:16050]	12.3333	12.6667	108.333	-0.498657	0.405472	2.33223	4.23558e-09	2.89731	1.57686e-19
ENSG00000123066	MED13L	mediator complex subunit 13L [Source:HGNC Symbol;Acc:HGNC:22962]	40	56.3333	284.333	-0.026272	0.934786	2.04178	9.93511e-14	2.13347	1.57786e-33
ENSG00000112282	MED23	mediator complex subunit 23 [Source:HGNC Symbol;Acc:HGNC:2372]	47	55.3333	378.667	-1.20758	0.0346832	1.45253	0.00510684	2.56724	1.57641e-54
ENSG00000105085	MED26	mediator complex subunit 26 [Source:HGNC Symbol;Acc:HGNC:2376]	18.6667	25	161	-0.172226	0.694908	2.26692	9.27342e-12	2.47884	1.76102e-24
ENSG00000105429	MEGF8	multiple EGF like domains 8 [Source:HGNC Symbol;Acc:HGNC:3233]	17	50	657	1.08677	0.0180026	4.51326	1.70977e-35	3.50879	1.23824e-95
ENSG00000117899	MESD	mesoderm development LRP chaperone [Source:HGNC Symbol;Acc:HGNC:13520]	106.667	246.333	157.667	0.658728	0.00379497	-0.234316	0.321512	-0.845929	3.00325e-09
ENSG00000116688	MFN2	mitofusin 2 [Source:HGNC Symbol;Acc:HGNC:16877]	121.667	137	811.667	-0.599174	0.0541335	1.78351	1.39749e-12	2.36416	2.79839e-85
ENSG00000148110	MFSD14B	major facilitator superfamily domain containing 14B [Source:HGNC Symbol;Acc:HGNC:23376]	83.6667	183.333	25.3333	0.70616	0.0192384	-2.36536	5.79615e-09	-3.05698	5.55917e-39
ENSG00000174197	MGA	MAX dimerization protein MGA [Source:HGNC Symbol;Acc:HGNC:14010]	55	81.6667	593.667	-0.0600338	0.849913	2.573	4.91509e-25	2.65742	5.6802e-83
ENSG00000128268	MGAT3	beta-1,4-mannosyl-glycoprotein 4-beta-N-acetylglucosaminyltransferase [Source:HGNC Symbol;Acc:HGNC:7046]	8.66667	26	71.3333	1.12583	0.0466849	2.27427	1.37502e-06	1.24917	6.61904e-06
ENSG00000008394	MGST1	microsomal glutathione S-transferase 1 [Source:HGNC Symbol;Acc:HGNC:7061]	61	198	27	0.93942	0.00469161	-2.17773	6.21536e-08	-3.07446	2.50186e-41
ENSG00000143198	MGST3	microsomal glutathione S-transferase 3 [Source:HGNC Symbol;Acc:HGNC:7064]	261.667	541	37.3333	0.712545	0.0157046	-3.3776	3.40919e-17	-4.0628	2.65243e-118
ENSG00000167470	MIDN	midnolin [Source:HGNC Symbol;Acc:HGNC:16298]	58.6667	151.333	252	0.817177	0.00458422	1.29201	4.52619e-07	0.528622	0.000306795
ENSG00000148343	MIGA2	mitoguardin 2 [Source:HGNC Symbol;Acc:HGNC:23621]	16	16.3333	227	-0.801522	0.151528	2.86687	3.33619e-13	3.59155	8.60418e-45
ENSG00000141503	MINK1	misshapen like kinase 1 [Source:HGNC Symbol;Acc:HGNC:17565]	31.6667	38.6667	279.333	-0.249601	0.489947	2.33148	6.15735e-18	2.6479	1.37764e-44
ENSG00000099812	MISP	mitotic spindle positioning [Source:HGNC Symbol;Acc:HGNC:27000]	5.66667	0	0.333333	-5.87069	6.19681e-05	-5.11475	0.000405718
ENSG00000148773	MKI67	marker of proliferation Ki-67 [Source:HGNC Symbol;Acc:HGNC:7107]	108.333	182.333	1643.67	0.229532	0.358894	3.14112	5.32492e-41	2.96468	2.40042e-183
ENSG00000175727	MLXIP	MLX interacting protein [Source:HGNC Symbol;Acc:HGNC:17055]	65.3333	84	448.667	-0.139576	0.626779	2.00475	2.3632e-16	2.21336	8.88243e-53
ENSG00000061987	MON2	MON2 homolog, regulator of endosome-to-Golgi trafficking [Source:HGNC Symbol;Acc:HGNC:29177]	34.3333	56.6667	377	0.223319	0.516069	2.66819	2.38323e-23	2.52819	2.138e-54
ENSG00000133422	MORC2	MORC family CW-type zinc finger 2 [Source:HGNC Symbol;Acc:HGNC:23573]	97.6667	110	655.667	-0.29517	0.307203	2.02497	5.46574e-15	2.37256	1.06048e-70
ENSG00000143158	MPC2	mitochondrial pyruvate carrier 2 [Source:HGNC Symbol;Acc:HGNC:24515]	102.333	237.667	41	0.745244	0.00641021	-2.01461	4.95342e-08	-2.74038	3.6241e-41
ENSG00000107186	MPDZ	multiple PDZ domain crumbs cell polarity complex component [Source:HGNC Symbol;Acc:HGNC:7208]	24.6667	29.3333	187	-0.281417	0.535126	2.1237	1.99513e-12	2.47263	2.55234e-26
ENSG00000161647	MPP3	membrane palmitoylated protein 3 [Source:HGNC Symbol;Acc:HGNC:7221]	11	16.3333	126	0.161467	0.795393	2.7573	1.48869e-10	2.73558	1.47474e-21
ENSG00000133030	MPRIP	myosin phosphatase Rho interacting protein [Source:HGNC Symbol;Acc:HGNC:30321]	166.667	230.333	1532.67	-0.0204066	0.92948	2.46698	3.34719e-28	2.53105	4.97226e-146
ENSG00000197965	MPZL1	myelin protein zero like 1 [Source:HGNC Symbol;Acc:HGNC:7226]	102.333	207.333	41.3333	0.512637	0.0372126	-2.05321	1.5106e-11	-2.52988	1.32839e-35
ENSG00000116898	MRPS15	mitochondrial ribosomal protein S15 [Source:HGNC Symbol;Acc:HGNC:14504]	175.333	265.667	2451.33	0.166005	0.516282	3.12494	4.75771e-34	3.00307	6.49974e-239
ENSG00000131368	MRPS25	mitochondrial ribosomal protein S25 [Source:HGNC Symbol;Acc:HGNC:14511]	32.6667	39	411.333	-0.250221	0.539675	2.87216	9.79763e-24	3.1953	5.56981e-66
ENSG00000052802	MSMO1	methylsterol monooxygenase 1 [Source:HGNC Symbol;Acc:HGNC:10545]	61.6667	141.667	22	0.646645	0.0144693	-2.29284	5.6232e-10	-2.88876	3.37778e-30
ENSG00000125459	MSTO1	misato mitochondrial distribution and morphology regulator 1 [Source:HGNC Symbol;Acc:HGNC:29678]	68.6667	169.667	280.333	0.751202	0.0025342	1.21763	1.5663e-07	0.52087	0.000104251
ENSG00000203761	MSTO2P	misato family member 2, pseudogene [Source:HGNC Symbol;Acc:HGNC:26329]	21	57.6667	57	0.890095	0.0206327	0.617777	0.134666	-0.215975	0.414525
ENSG00000198899	MT-ATP6	mitochondrially encoded ATP synthase membrane subunit 6 [Source:HGNC Symbol;Acc:HGNC:7414]	1614.67	4364	61.6667	1.02366	7.90767e-06	-5.34831	1.85214e-68	-6.34518	0
ENSG00000248527	MTATP6P1	MT-ATP6 pseudogene 1 [Source:HGNC Symbol;Acc:HGNC:44575]	328.333	811.667	14.3333	0.897048	0.000232371	-5.15346	3.72379e-41	-6.02665	1.05586e-137
ENSG00000168502	MTCL1	microtubule crosslinking factor 1 [Source:HGNC Symbol;Acc:HGNC:29121]	15.3333	23	355.333	-0.16225	0.753913	3.62271	3.76313e-24	3.74326	3.69542e-67
ENSG00000198712	MT-CO2	mitochondrially encoded cytochrome c oxidase II [Source:HGNC Symbol;Acc:HGNC:7421]	3731.67	10328.3	146.667	1.12217	8.49518e-06	-5.25923	2.12011e-63	-6.34211	0
ENSG00000229344	MTCO2P12	MT-CO2 pseudogene 12 [Source:HGNC Symbol;Acc:HGNC:52028]	445.667	1480.67	19.6667	1.14662	7.3672e-10	-5.31017	3.10168e-82	-6.43549	2.1616e-202
ENSG00000267541	MTCO2P2	MT-CO2 pseudogene 2 [Source:HGNC Symbol;Acc:HGNC:25354]	25.6667	82	0.333333	1.17508	0.00155844	-6.91148	6.27048e-08	-8.04244	2.45157e-11
ENSG00000198727	MT-CYB	mitochondrially encoded cytochrome b [Source:HGNC Symbol;Acc:HGNC:7427]	2483.33	5960.33	306.667	0.824566	1.68671e-05	-3.68356	8.82629e-51	-4.48437	0
ENSG00000177000	MTHFR	methylenetetrahydrofolate reductase [Source:HGNC Symbol;Acc:HGNC:7436]	18.6667	30.3333	213	0.00348524	0.993936	2.61799	2.35291e-14	2.60492	1.09731e-32
ENSG00000100330	MTMR3	myotubularin related protein 3 [Source:HGNC Symbol;Acc:HGNC:7451]	40.3333	50.3333	283.667	-0.224334	0.601449	2.02125	2.92004e-13	2.30116	7.38434e-08
ENSG00000198888	MT-ND1	mitochondrially encoded NADH:ubiquinone oxidoreductase core subunit 1 [Source:HGNC Symbol;Acc:HGNC:7455]	1090.33	2253	76	0.713004	0.0109641	-4.416	8.85549e-35	-5.092	0
ENSG00000225972	MTND1P23	MT-ND1 pseudogene 23 [Source:HGNC Symbol;Acc:HGNC:42092]	571.333	1176.33	31.3333	0.585618	0.00393489	-4.86409	3.63653e-56	-5.43151	7.05569e-210
ENSG00000198763	MT-ND2	mitochondrially encoded NADH:ubiquinone oxidoreductase core subunit 2 [Source:HGNC Symbol;Acc:HGNC:7456]	521.667	1199	23	0.911216	0.00457558	-5.03062	4.84889e-31	-5.90582	3.60467e-197
ENSG00000225630	MTND2P28	MT-ND2 pseudogene 28 [Source:HGNC Symbol;Acc:HGNC:42129]	48	127.333	5.33333	0.873848	0.00214446	-3.94967	8.72529e-14	-4.77955	3.24583e-31
ENSG00000198840	MT-ND3	mitochondrially encoded NADH:ubiquinone oxidoreductase core subunit 3 [Source:HGNC Symbol;Acc:HGNC:7458]	1234	2675.33	43.3333	0.482538	0.00960698	-5.67095	5.15253e-151	-6.14906	0
ENSG00000198886	MT-ND4	mitochondrially encoded NADH:ubiquinone oxidoreductase core subunit 4 [Source:HGNC Symbol;Acc:HGNC:7459]	2185	5601.67	98	1.02084	0.000148276	-5.05534	1.30944e-48	-6.03873	0
ENSG00000212907	MT-ND4L	mitochondrially encoded NADH:ubiquinone oxidoreductase core subunit 4L [Source:HGNC Symbol;Acc:HGNC:7460]	73.6667	168.333	5	0.719914	0.0105603	-4.56346	1.15078e-17	-5.27473	8.73756e-38
ENSG00000198786	MT-ND5	mitochondrially encoded NADH:ubiquinone oxidoreductase core subunit 5 [Source:HGNC Symbol;Acc:HGNC:7461]	160.667	368.333	18	0.688314	0.00114826	-3.9038	4.65544e-32	-4.55946	1.4949e-86
ENSG00000198793	MTOR	mechanistic target of rapamycin kinase [Source:HGNC Symbol;Acc:HGNC:3942]	106	162.333	1568.33	0.20194	0.486965	3.2132	6.23667e-30	3.06738	1.25136e-204
ENSG00000116984	MTR	5-methyltetrahydrofolate-homocysteine methyltransferase [Source:HGNC Symbol;Acc:HGNC:7468]	70	193	582.333	1.01913	0.000393861	2.34449	8.50691e-17	1.38711	1.67154e-34
ENSG00000132613	MTSS2	MTSS I-BAR domain containing 2 [Source:HGNC Symbol;Acc:HGNC:25094]	43.6667	57	320.667	-0.135127	0.681842	2.09055	1.19975e-15	2.28913	5.58802e-41
ENSG00000242086	MUC20-OT1	MUC20 overlapping transcript [Source:HGNC Symbol;Acc:HGNC:53807]	6.33333	8.66667	78	0.00197616	0.997938	2.84143	5.42169e-09	2.96751	1.17842e-15
ENSG00000132382	MYBBP1A	MYB binding protein 1a [Source:HGNC Symbol;Acc:HGNC:7546]	157.667	240	1550	-0.579196	0.186624	1.97201	6.82257e-07	2.48658	9.20336e-153
ENSG00000101057	MYBL2	MYB proto-oncogene like 2 [Source:HGNC Symbol;Acc:HGNC:7548]	317	413	2095.33	-0.217938	0.291624	1.90149	6.86549e-29	2.14128	9.86647e-119
ENSG00000005810	MYCBP2	MYC binding protein 2 [Source:HGNC Symbol;Acc:HGNC:23386]	76.3333	123	738	0.185625	0.480296	2.50185	1.64209e-26	2.37911	7.63704e-85
ENSG00000104177	MYEF2	myelin expression factor 2 [Source:HGNC Symbol;Acc:HGNC:17940]	19	60.3333	51.6667	1.23926	0.00495194	0.769817	0.10843	-0.423976	0.0875701
ENSG00000145555	MYO10	myosin X [Source:HGNC Symbol;Acc:HGNC:7593]	19.6667	37.6667	193	0.460986	0.288126	2.52914	1.05489e-13	2.15537	2.24436e-25
ENSG00000196535	MYO18A	myosin XVIIIA [Source:HGNC Symbol;Acc:HGNC:31104]	14.3333	16	174.667	-0.971965	0.139521	2.40746	3.21103e-06	3.24309	6.08357e-33
ENSG00000176658	MYO1D	myosin ID [Source:HGNC Symbol;Acc:HGNC:7598]	63.3333	67	436.333	-0.345826	0.330753	2.0869	5.53251e-12	2.49985	3.51095e-56
ENSG00000095777	MYO3A	myosin IIIA [Source:HGNC Symbol;Acc:HGNC:7601]	13.3333	26.3333	148.333	0.490933	0.316819	2.68511	2.89343e-13	2.28837	1.78245e-21
ENSG00000197535	MYO5A	myosin VA [Source:HGNC Symbol;Acc:HGNC:7602]	19.3333	25.6667	220.333	-0.129289	0.763134	2.70097	3.99235e-18	2.89717	1.26405e-38
ENSG00000066933	MYO9A	myosin IXA [Source:HGNC Symbol;Acc:HGNC:7608]	61.6667	90.6667	618	0.192546	0.60146	2.68384	4.61793e-15	2.56313	7.85391e-85
ENSG00000099331	MYO9B	myosin IXB [Source:HGNC Symbol;Acc:HGNC:7609]	30.6667	54.6667	708	0.357264	0.345425	3.76628	6.96121e-35	3.49195	4.31231e-110
ENSG00000124920	MYRF	myelin regulatory factor [Source:HGNC Symbol;Acc:HGNC:1181]	9	12	106	-0.175675	0.766436	2.71383	3.52171e-10	2.93279	3.73997e-19
ENSG00000162601	MYSM1	Myb like, SWIRM and MPN domains 1 [Source:HGNC Symbol;Acc:HGNC:29401]	62.3333	70.3333	564.667	-0.348418	0.261344	2.39297	8.94826e-22	2.8037	1.03237e-73
ENSG00000172766	NAA16	N-alpha-acetyltransferase 16, NatA auxiliary subunit [Source:HGNC Symbol;Acc:HGNC:26164]	41	44.6667	708.333	-0.376344	0.282492	3.33355	4.56636e-38	3.78254	7.06181e-123
ENSG00000136274	NACAD	NAC alpha domain containing [Source:HGNC Symbol;Acc:HGNC:22196]	7	9.66667	55	-0.0742242	0.914245	2.17105	7.40243e-06	2.30712	2.34139e-09
ENSG00000108784	NAGLU	N-acetyl-alpha-glucosaminidase [Source:HGNC Symbol;Acc:HGNC:7632]	95.6667	236	634	0.716816	0.00446336	1.89471	2.89128e-14	1.21806	1.46559e-21
ENSG00000188613	NANOS1	nanos C2HC-type zinc finger 1 [Source:HGNC Symbol;Acc:HGNC:23044]	6	59.3333	71	2.63865	1.48521e-06	2.65128	4.22921e-07	0.0571455	0.803685
ENSG00000147813	NAPRT	nicotinate phosphoribosyltransferase [Source:HGNC Symbol;Acc:HGNC:30450]	9	39.3333	39.6667	1.6082	0.00116394	1.33222	0.00744975	-0.201528	0.494838
ENSG00000135372	NAT10	N-acetyltransferase 10 [Source:HGNC Symbol;Acc:HGNC:29830]	112.333	158	806.667	-0.0232699	0.924386	2.07652	2.09454e-20	2.1473	6.44139e-71
ENSG00000166833	NAV2	neuron navigator 2 [Source:HGNC Symbol;Acc:HGNC:15997]	5.66667	8.33333	63	-0.237984	0.762878	2.54065	5.57131e-06	2.71544	1.50595e-11
ENSG00000172915	NBEA	neurobeachin [Source:HGNC Symbol;Acc:HGNC:7648]	8.33333	13.3333	89	-0.119794	0.852052	2.46655	2.62034e-07	2.53251	1.45244e-15
ENSG00000160796	NBEAL2	neurobeachin like 2 [Source:HGNC Symbol;Acc:HGNC:31928]	17.3333	32.3333	902.333	0.517126	0.326207	4.97789	1.81763e-41	4.59886	1.7526e-152
ENSG00000271425	NBPF10	NBPF member 10 [Source:HGNC Symbol;Acc:HGNC:31992]	11.6667	21.6667	361	0.289335	0.57133	4.10638	7.84371e-33	3.85079	1.16542e-68
ENSG00000263956	NBPF11	NBPF member 11 [Source:HGNC Symbol;Acc:HGNC:31993]	9	21.3333	319	0.722497	0.175661	4.33928	3.9941e-31	3.69948	5.56247e-60
ENSG00000268043	NBPF12	NBPF member 12 [Source:HGNC Symbol;Acc:HGNC:24297]	11	22	314.667	0.484433	0.365111	4.0284	2.59597e-28	3.6331	7.71683e-61
ENSG00000270629	NBPF14	NBPF member 14 [Source:HGNC Symbol;Acc:HGNC:25232]	15.3333	16	365.333	-0.616726	0.231079	3.70672	4.81321e-29	4.3075	3.88762e-70
ENSG00000266338	NBPF15	NBPF member 15 [Source:HGNC Symbol;Acc:HGNC:28791]	13.3333	15.6667	283.667	-0.377791	0.471643	3.57797	1.45466e-27	3.97452	1.59471e-55
ENSG00000162825	NBPF20	NBPF member 20 [Source:HGNC Symbol;Acc:HGNC:32000]	12.3333	23	312.667	0.0371155	0.948166	3.68374	1.39173e-18	3.55953	8.29394e-59
ENSG00000273136	NBPF26	NBPF member 26 [Source:HGNC Symbol;Acc:HGNC:49571]	9.66667	11.3333	143.333	-0.296546	0.649523	3.0781	4.40294e-14	3.45777	7.24749e-29
ENSG00000142794	NBPF3	NBPF member 3 [Source:HGNC Symbol;Acc:HGNC:25076]	6.33333	8	44.6667	-0.0988582	0.902758	2.06294	0.000204515	2.28437	1.44228e-07
ENSG00000270231	NBPF8	NBPF member 8 [Source:HGNC Symbol;Acc:HGNC:31990]	10	14.6667	306.667	-0.234038	0.707481	4.03975	4.36013e-24	4.18365	8.35501e-59
ENSG00000269713	NBPF9	NBPF member 9 [Source:HGNC Symbol;Acc:HGNC:31991]	11	20.3333	272.667	0.445566	0.443707	3.85348	3.28352e-24	3.54077	4.77534e-53
ENSG00000121152	NCAPH	non-SMC condensin I complex subunit H [Source:HGNC Symbol;Acc:HGNC:1112]	92.6667	107.333	646.667	-0.247686	0.383667	2.08269	4.91343e-15	2.38891	9.06919e-75
ENSG00000167566	NCKAP5L	NCK associated protein 5 like [Source:HGNC Symbol;Acc:HGNC:29321]	10.6667	15.3333	86	-0.30905	0.615626	2.01915	2.41187e-05	2.28261	9.04551e-14
ENSG00000124151	NCOA3	nuclear receptor coactivator 3 [Source:HGNC Symbol;Acc:HGNC:7670]	30.3333	35.3333	237.667	-0.291207	0.450264	2.18488	5.55555e-13	2.54379	3.21415e-35
ENSG00000141027	NCOR1	nuclear receptor corepressor 1 [Source:HGNC Symbol;Acc:HGNC:7672]	195.667	231.333	1457	-0.202706	0.408052	2.20441	5.84965e-18	2.44842	2.61472e-145
ENSG00000196498	NCOR2	nuclear receptor corepressor 2 [Source:HGNC Symbol;Acc:HGNC:7673]	118.333	125.333	954.667	-0.275073	0.398245	2.39298	2.11579e-13	2.7226	1.50903e-125
ENSG00000162736	NCSTN	nicastrin [Source:HGNC Symbol;Acc:HGNC:17091]	94.6667	213	99.3333	0.733979	0.0114595	-0.608369	0.0613282	-1.301	1.14123e-14
ENSG00000102471	NDFIP2	Nedd4 family interacting protein 2 [Source:HGNC Symbol;Acc:HGNC:18537]	127.667	275.667	37.3333	0.676744	0.0120185	-2.43413	1.64383e-11	-3.08852	1.39333e-54
ENSG00000178057	NDUFAF3	NADH:ubiquinone oxidoreductase complex assembly factor 3 [Source:HGNC Symbol;Acc:HGNC:29918]	258.667	526	100.667	0.590742	0.0137805	-2.01225	1.84874e-10	-2.5844	2.655e-73
ENSG00000151366	NDUFC2	NADH:ubiquinone oxidoreductase subunit C2 [Source:HGNC Symbol;Acc:HGNC:7706]	229	483.667	81.3333	0.565753	0.00472288	-2.24229	2.63947e-19	-2.77598	1.06538e-82
ENSG00000245532	NEAT1	nuclear paraspeckle assembly transcript 1 [Source:HGNC Symbol;Acc:HGNC:30815]	44.3333	147.333	64.3333	1.16435	8.69962e-05	-0.274491	0.413902	-1.39217	1.16388e-11
ENSG00000277586	NEFL	neurofilament light [Source:HGNC Symbol;Acc:HGNC:7739]	46	130	859.333	0.964262	0.00095307	3.42891	2.94305e-47	2.5235	2.4788e-90
ENSG00000104722	NEFM	neurofilament medium [Source:HGNC Symbol;Acc:HGNC:7734]	51.6667	230.333	171.333	1.66517	1.00202e-09	0.980626	0.000969248	-0.630152	1.83818e-05
ENSG00000136098	NEK3	NIMA related kinase 3 [Source:HGNC Symbol;Acc:HGNC:7746]	12	36.3333	106.667	1.1415	0.0244442	2.40246	2.1546e-08	1.35016	1.58274e-08
ENSG00000119638	NEK9	NIMA related kinase 9 [Source:HGNC Symbol;Acc:HGNC:18591]	73.6667	94	763	-0.302076	0.317589	2.50415	4.55244e-28	2.81608	1.42282e-98
ENSG00000184613	NELL2	neural EGFL like 2 [Source:HGNC Symbol;Acc:HGNC:7751]	5.66667	48.6667	50.3333	2.4228	2.37642e-05	2.2124	9.22516e-05	-0.152841	0.558018
ENSG00000165525	NEMF	nuclear export mediator factor [Source:HGNC Symbol;Acc:HGNC:10663]	94.6667	130.333	807.333	-0.345144	0.304728	2.11038	2.48288e-14	2.42941	1.02125e-89
ENSG00000162614	NEXN	nexilin F-actin binding protein [Source:HGNC Symbol;Acc:HGNC:29557]	4.66667	16.3333	222.667	1.37816	0.0705122	4.79087	1.93428e-22	3.56369	6.21906e-44
ENSG00000176953	NFATC2IP	nuclear factor of activated T cells 2 interacting protein [Source:HGNC Symbol;Acc:HGNC:25906]	93.6667	150	930	0.140745	0.566424	2.50883	1.068e-33	2.42674	4.78618e-108
ENSG00000100968	NFATC4	nuclear factor of activated T cells 4 [Source:HGNC Symbol;Acc:HGNC:7778]	8.33333	14.3333	117.667	0.106358	0.869806	2.95186	2.22507e-10	2.8337	8.10927e-22
ENSG00000170322	NFRKB	nuclear factor related to kappaB binding protein [Source:HGNC Symbol;Acc:HGNC:7802]	106.333	122.333	1019.33	-0.312564	0.229823	2.48933	1.87046e-26	2.85436	2.96525e-123
ENSG00000086102	NFX1	nuclear transcription factor, X-box binding 1 [Source:HGNC Symbol;Acc:HGNC:7803]	73	90.6667	769.333	-0.22434	0.403336	2.59552	2.57574e-33	2.87973	1.61125e-112
ENSG00000101004	NINL	ninein like [Source:HGNC Symbol;Acc:HGNC:29163]	15.6667	26.3333	275.667	0.349457	0.514316	3.38582	3.87272e-20	3.18252	2.5817e-50
ENSG00000010322	NISCH	nischarin [Source:HGNC Symbol;Acc:HGNC:18006]	60	81	1227	-0.225708	0.476733	3.4848	5.85459e-50	3.71701	1.87146e-185
ENSG00000145506	NKD2	NKD inhibitor of WNT signaling pathway 2 [Source:HGNC Symbol;Acc:HGNC:17046]	3.66667	6.33333	35	0.326136	0.720683	2.47104	0.000105539	2.26414	1.9268e-06
ENSG00000169992	NLGN2	neuroligin 2 [Source:HGNC Symbol;Acc:HGNC:14290]	10.6667	14.3333	266.667	-0.140695	0.805645	3.82315	3.79263e-27	4.01128	2.33232e-52
ENSG00000109255	NMU	neuromedin U [Source:HGNC Symbol;Acc:HGNC:7859]	25.3333	73.3333	39.6667	0.989766	0.00621092	-0.168393	0.673981	-1.09666	3.04543e-05
ENSG00000106100	NOD1	nucleotide binding oligomerization domain containing 1 [Source:HGNC Symbol;Acc:HGNC:16390]	10.3333	13.3333	193.333	-0.228357	0.701103	3.38461	7.52794e-18	3.6515	1.85522e-38
ENSG00000183691	NOG	noggin [Source:HGNC Symbol;Acc:HGNC:7866]	13.6667	6.33333	10.3333	-1.55848	0.0173046	-1.11249	0.0791081	0.510137	0.425217
ENSG00000165271	NOL6	nucleolar protein 6 [Source:HGNC Symbol;Acc:HGNC:19910]	30.3333	51	405.667	0.299323	0.442088	2.98871	3.86542e-22	2.78262	4.58602e-61
ENSG00000198000	NOL8	nucleolar protein 8 [Source:HGNC Symbol;Acc:HGNC:23387]	22.3333	32.6667	354.667	0.0484487	0.906463	3.20297	5.27553e-26	3.23899	1.11343e-61
ENSG00000101361	NOP56	NOP56 ribonucleoprotein [Source:HGNC Symbol;Acc:HGNC:15911]	500.667	620	4489.67	-0.041268	0.878769	2.57315	1.2308e-16	2.65047	1.4926e-270
ENSG00000235559	NOP56P1	NOP56 ribonucleoprotein pseudogene 1 [Source:HGNC Symbol;Acc:HGNC:13962]	12	16.3333	146.667	0.0167145	0.978032	2.84887	2.54964e-12	2.96272	1.5617e-27
ENSG00000055044	NOP58	NOP58 ribonucleoprotein [Source:HGNC Symbol;Acc:HGNC:29926]	553	598	4116.67	-0.389707	0.0478497	2.15944	1.64886e-26	2.57653	6.68915e-184
ENSG00000148400	NOTCH1	notch receptor 1 [Source:HGNC Symbol;Acc:HGNC:7881]	14.6667	22.3333	238	0.0171895	0.971552	3.19353	1.08606e-22	3.21098	1.85175e-43
ENSG00000170485	NPAS2	neuronal PAS domain protein 2 [Source:HGNC Symbol;Acc:HGNC:7895]	5.33333	10.6667	54.3333	0.529064	0.532183	2.57276	4.43034e-05	2.14881	1.58538e-08
ENSG00000113971	NPHP3	nephrocystin 3 [Source:HGNC Symbol;Acc:HGNC:7907]	37.6667	57.3333	323.667	-0.0332909	0.928193	2.24672	1.29808e-15	2.29367	2.5689e-39
ENSG00000183426	NPIPA1	nuclear pore complex interacting protein family member A1 [Source:HGNC Symbol;Acc:HGNC:7909]	4	8.33333	163.333	0.568247	0.515985	4.5432	6.6109e-19	4.08846	1.33667e-33
ENSG00000254852	NPIPA2	nuclear pore complex interacting protein family member A2 [Source:HGNC Symbol;Acc:HGNC:41979]	4.66667	5.66667	96	-0.183678	0.844202	3.56055	1.59508e-11	3.8775	8.71889e-21
ENSG00000214967	NPIPA7	nuclear pore complex interacting protein family member A7 [Source:HGNC Symbol;Acc:HGNC:41982]	4	10.6667	152.667	0.85538	0.256246	4.4298	2.46992e-18	3.63361	4.29366e-31
ENSG00000233024	NPIPA9	nuclear pore complex interacting protein family, member A9 [Source:HGNC Symbol;Acc:HGNC:41984]	9.66667	17.3333	226.667	0.316532	0.60339	3.75604	9.24101e-23	3.51046	8.79849e-42
ENSG00000254206	NPIPB11	nuclear pore complex interacting protein family member B11 [Source:HGNC Symbol;Acc:HGNC:37453]	4.33333	5.33333	239.333	-0.293769	0.734365	4.96488	2.81577e-25	5.28215	1.88706e-41
ENSG00000169203	NPIPB12	nuclear pore complex interacting protein family member B12 [Source:HGNC Symbol;Acc:HGNC:37491]	7.66667	10	327	-0.0208617	0.977912	4.63203	3.99673e-30	4.82857	2.30926e-59
ENSG00000198064	NPIPB13	nuclear pore complex interacting protein family, member B13 [Source:HGNC Symbol;Acc:HGNC:41989]	3.66667	6	265	0.232005	0.805639	5.36716	3.04111e-26	5.26088	6.61234e-46
ENSG00000169246	NPIPB3	nuclear pore complex interacting protein family member B3 [Source:HGNC Symbol;Acc:HGNC:28989]	8	11	272.333	0.0133934	0.984808	4.30283	1.61264e-26	4.42818	2.66793e-52
ENSG00000185864	NPIPB4	nuclear pore complex interacting protein family member B4 [Source:HGNC Symbol;Acc:HGNC:41985]	8.33333	10	300	-0.263226	0.682555	4.35844	1.22535e-30	4.70397	4.8015e-56
ENSG00000243716	NPIPB5	nuclear pore complex interacting protein family member B5 [Source:HGNC Symbol;Acc:HGNC:37233]	11	15.6667	449.667	0.135243	0.834729	4.57749	4.73545e-36	4.6373	3.42993e-81
ENSG00000196993	NPIPB9	nuclear pore complex interacting protein family member B9 [Source:HGNC Symbol;Acc:HGNC:41987]	3.66667	8.66667	59.6667	0.609181	0.452911	3.18234	2.39001e-08	2.5827	5.16326e-11
ENSG00000135838	NPL	N-acetylneuraminate pyruvate lyase [Source:HGNC Symbol;Acc:HGNC:16781]	2	12	10	2.05343	0.025378	1.52926	0.124294	-0.482022	0.409834
ENSG00000164128	NPY1R	neuropeptide Y receptor Y1 [Source:HGNC Symbol;Acc:HGNC:7956]	0	12.3333	5.33333	4.91318	0.000517557	3.50176	0.0450099	-1.41837	0.0411455
ENSG00000115216	NRBP1	nuclear receptor binding protein 1 [Source:HGNC Symbol;Acc:HGNC:7993]	107	129.667	906.333	-0.158784	0.571864	2.38943	2.95773e-16	2.59409	7.36109e-86
ENSG00000119720	NRDE2	NRDE-2, necessary for RNA interference, domain containing [Source:HGNC Symbol;Acc:HGNC:20186]	68.6667	83.3333	534.667	-0.383037	0.217901	2.07889	6.21591e-17	2.47526	5.66098e-70
ENSG00000158458	NRG2	neuregulin 2 [Source:HGNC Symbol;Acc:HGNC:7998]	3.66667	15.3333	33.3333	1.56545	0.0351291	2.40306	0.000190146	0.921489	0.016358
ENSG00000165671	NSD1	nuclear receptor binding SET domain protein 1 [Source:HGNC Symbol;Acc:HGNC:14234]	74.3333	111.667	1033.67	-0.222409	0.525218	2.81096	3.50044e-23	3.00559	4.31908e-147
ENSG00000109685	NSD2	nuclear receptor binding SET domain protein 2 [Source:HGNC Symbol;Acc:HGNC:12766]	212	270.333	1832	-0.154925	0.472167	2.35334	9.3419e-29	2.55288	8.03124e-158
ENSG00000117697	NSL1	NSL1 component of MIS12 kinetochore complex [Source:HGNC Symbol;Acc:HGNC:24548]	111	258.333	21	0.580562	0.0210083	-3.2767	2.03262e-25	-3.82229	2.5521e-60
ENSG00000165802	NSMF	NMDA receptor synaptonuclear signaling and neuronal migration factor [Source:HGNC Symbol;Acc:HGNC:29843]	86	154.667	794.667	0.425739	0.188783	2.53216	4.49391e-17	2.15977	7.23474e-67
ENSG00000015676	NUDCD3	NudC domain containing 3 [Source:HGNC Symbol;Acc:HGNC:22208]	87	92.6667	483	-0.363854	0.215954	1.75911	1.11096e-10	2.17692	3.92049e-54
ENSG00000213965	NUDT19	nudix hydrolase 19 [Source:HGNC Symbol;Acc:HGNC:32036]	25.6667	71	16	0.992647	0.00729737	-1.39393	0.00481119	-2.35372	3.75882e-14
ENSG00000137497	NUMA1	nuclear mitotic apparatus protein 1 [Source:HGNC Symbol;Acc:HGNC:8059]	147.333	194	1357.33	0.144339	0.724651	2.70534	4.40937e-10	2.60275	1.77879e-110
ENSG00000105245	NUMBL	NUMB like endocytic adaptor protein [Source:HGNC Symbol;Acc:HGNC:8061]	10.3333	34	90	1.1618	0.0130303	2.29876	6.95428e-09	1.20124	1.11412e-06
ENSG00000132182	NUP210	nucleoporin 210 [Source:HGNC Symbol;Acc:HGNC:30052]	112.333	160.333	1127.67	0.0811825	0.771956	2.64094	6.19561e-22	2.60989	7.21708e-132
ENSG00000126883	NUP214	nucleoporin 214 [Source:HGNC Symbol;Acc:HGNC:8064]	38.6667	67	414.333	0.288057	0.400834	2.64675	2.96149e-22	2.4256	1.58562e-52
ENSG00000213024	NUP62	nucleoporin 62 [Source:HGNC Symbol;Acc:HGNC:8066]	116.333	159.667	814	-0.0771133	0.76563	2.02835	3.16538e-18	2.14774	3.84277e-73
ENSG00000182379	NXPH4	neurexophilin 4 [Source:HGNC Symbol;Acc:HGNC:8078]	10.3333	32.3333	11.6667	1.07943	0.0239833	-0.661194	0.266627	-1.67612	5.69782e-05
ENSG00000136811	ODF2	outer dense fiber of sperm tails 2 [Source:HGNC Symbol;Acc:HGNC:8114]	53.3333	83	758.667	-0.185467	0.632082	2.8346	5.37008e-20	2.98863	3.71959e-106
ENSG00000122417	ODF2L	outer dense fiber of sperm tails 2 like [Source:HGNC Symbol;Acc:HGNC:29225]	44.6667	57	309.667	-0.196038	0.540969	1.9845	1.99275e-15	2.23665	2.50568e-39
ENSG00000046651	OFD1	OFD1 centriole and centriolar satellite protein [Source:HGNC Symbol;Acc:HGNC:2567]	20.3333	39	422	0.316922	0.443546	3.52264	2.10738e-31	3.23296	3.96237e-73
ENSG00000198408	OGA	O-GlcNAcase [Source:HGNC Symbol;Acc:HGNC:7056]	102.667	193.667	1201	0.0154682	0.96544	2.48878	9.01869e-17	2.42877	2.25714e-108
ENSG00000197444	OGDHL	oxoglutarate dehydrogenase L [Source:HGNC Symbol;Acc:HGNC:25590]	23.6667	46	321.667	0.50671	0.237564	3.01168	5.20921e-20	2.60209	2.09597e-46
ENSG00000147162	OGT	O-linked N-acetylglucosamine (GlcNAc) transferase [Source:HGNC Symbol;Acc:HGNC:8127]	212	344.333	1755.67	0.113846	0.594334	2.23375	9.27811e-37	2.14952	3.31919e-101
ENSG00000134996	OSTF1	osteoclast stimulating factor 1 [Source:HGNC Symbol;Acc:HGNC:8510]	41.6667	90.6667	19	0.655579	0.0487011	-1.82724	2.6961e-05	-2.45563	6.90844e-18
ENSG00000188729	OSTN	osteocrin [Source:HGNC Symbol;Acc:HGNC:29961]	1	12	0	2.89179	0.00623341			-6.223	3.63129e-06
ENSG00000083720	OXCT1	3-oxoacid CoA-transferase 1 [Source:HGNC Symbol;Acc:HGNC:8527]	63.3333	134	64.6667	0.597083	0.031345	-0.699101	0.0369323	-1.25655	1.55298e-10
ENSG00000179364	PACS2	phosphofurin acidic cluster sorting protein 2 [Source:HGNC Symbol;Acc:HGNC:23794]	60.3333	70.6667	497	-0.243212	0.43751	2.3004	4.61536e-17	2.61068	2.13905e-69
ENSG00000100266	PACSIN2	protein kinase C and casein kinase substrate in neurons 2 [Source:HGNC Symbol;Acc:HGNC:8571]	54.3333	128.667	353.333	0.783195	0.0110138	1.96843	7.76484e-12	1.25202	2.23463e-19
ENSG00000076641	PAG1	phosphoprotein membrane anchor with glycosphingolipid microdomains 1 [Source:HGNC Symbol;Acc:HGNC:30043]	28.3333	92.6667	101.333	1.32408	0.00192358	1.20607	0.00954119	-0.0784218	0.712321
ENSG00000083093	PALB2	partner and localizer of BRCA2 [Source:HGNC Symbol;Acc:HGNC:26144]	22.3333	30	179	-0.0157613	0.97245	2.27431	8.91257e-10	2.37655	2.3622e-25
ENSG00000107719	PALD1	phosphatase domain containing paladin 1 [Source:HGNC Symbol;Acc:HGNC:23530]	37	41.6667	231.333	-0.240226	0.554631	1.93081	1.17422e-08	2.26827	1.27409e-28
ENSG00000135473	PAN2	poly(A) specific ribonuclease subunit PAN2 [Source:HGNC Symbol;Acc:HGNC:20074]	37	48	403	-0.126809	0.715391	2.66448	1.35386e-22	2.86682	2.03269e-61
ENSG00000073150	PANX2	pannexin 2 [Source:HGNC Symbol;Acc:HGNC:8600]	14.3333	41.6667	84.6667	1.08386	0.0231926	1.80838	1.90189e-05	0.816375	0.00151338
ENSG00000160781	PAQR6	progestin and adipoQ receptor family member 6 [Source:HGNC Symbol;Acc:HGNC:30132]	9	15.6667	391.667	-0.229623	0.733406	4.379	1.67073e-19	4.43553	3.49168e-72
ENSG00000169116	PARM1	prostate androgen-regulated mucin-like protein 1 [Source:HGNC Symbol;Acc:HGNC:24536]	4	21.6667	5.33333	1.87871	0.00395825	-0.444602	0.614326	-2.23428	4.736e-05
ENSG00000102699	PARP4	poly(ADP-ribose) polymerase family member 4 [Source:HGNC Symbol;Acc:HGNC:271]	27.6667	40	216	0.176202	0.717886	2.30303	8.18758e-09	2.23009	2.34527e-29
ENSG00000137817	PARP6	poly(ADP-ribose) polymerase family member 6 [Source:HGNC Symbol;Acc:HGNC:26921]	53	72	399	-0.0787196	0.793778	2.11656	3.50648e-18	2.26372	4.84866e-50
ENSG00000115687	PASK	PAS domain containing serine/threonine kinase [Source:HGNC Symbol;Acc:HGNC:17270]	22.6667	43.6667	331.333	0.519269	0.24525	3.13296	4.43735e-19	2.71685	1.43253e-51
ENSG00000132849	PATJ	PATJ crumbs cell polarity complex component [Source:HGNC Symbol;Acc:HGNC:28881]	27.3333	30.6667	173.333	-0.456355	0.268212	1.80241	8.75415e-09	2.28943	5.37544e-25
ENSG00000159086	PAXBP1	PAX3 and PAX7 binding protein 1 [Source:HGNC Symbol;Acc:HGNC:13579]	73	87.6667	1438.33	-0.308175	0.257331	3.47823	1.33482e-63	3.83159	1.45748e-222
ENSG00000138650	PCDH10	protocadherin 10 [Source:HGNC Symbol;Acc:HGNC:13404]	1	81.3333	423	5.68649	8.65896e-12	7.81419	3.97377e-22	2.17516	3.42411e-48
ENSG00000118946	PCDH17	protocadherin 17 [Source:HGNC Symbol;Acc:HGNC:14267]	3.66667	12.6667	84	1.30302	0.092935	3.7185	2.57446e-11	2.52515	1.04924e-14
ENSG00000165494	PCF11	PCF11 cleavage and polyadenylation factor subunit [Source:HGNC Symbol;Acc:HGNC:30097]	31	59.6667	538.667	0.419252	0.230656	3.31796	1.90689e-37	2.96931	7.39483e-83
ENSG00000100889	PCK2	phosphoenolpyruvate carboxykinase 2, mitochondrial [Source:HGNC Symbol;Acc:HGNC:8725]	88.6667	216.667	73.6667	0.847775	0.00327966	-0.952029	0.00539108	-1.76094	1.11705e-24
ENSG00000186472	PCLO	piccolo presynaptic cytomatrix protein [Source:HGNC Symbol;Acc:HGNC:13406]	4.33333	8.33333	84.3333	0.498387	0.574932	3.50682	2.33636e-10	3.1395	1.23272e-16
ENSG00000078674	PCM1	pericentriolar material 1 [Source:HGNC Symbol;Acc:HGNC:8727]	87	108.333	637	-0.0681412	0.845165	2.23073	1.50418e-11	2.35222	3.85762e-67
ENSG00000160299	PCNT	pericentrin [Source:HGNC Symbol;Acc:HGNC:16068]	59	87.6667	1123.67	0.0289538	0.916968	3.44542	5.18085e-55	3.47575	4.43501e-172
ENSG00000100731	PCNX1	pecanex 1 [Source:HGNC Symbol;Acc:HGNC:19740]	63	71.6667	375.667	-0.404844	0.174297	1.73818	4.24151e-13	2.18236	2.55964e-42
ENSG00000135749	PCNX2	pecanex 2 [Source:HGNC Symbol;Acc:HGNC:8736]	42.6667	58.6667	444	-0.143093	0.6704	2.54259	5.75533e-23	2.71622	5.01564e-65
ENSG00000197136	PCNX3	pecanex 3 [Source:HGNC Symbol;Acc:HGNC:18760]	36.3333	70	461.667	0.302604	0.384908	2.79518	1.85969e-24	2.51627	3.97378e-63
ENSG00000163710	PCOLCE2	procollagen C-endopeptidase enhancer 2 [Source:HGNC Symbol;Acc:HGNC:8739]	25.6667	62.3333	68.3333	0.735567	0.0360809	0.605508	0.095343	-0.0670056	0.781069
ENSG00000160613	PCSK7	proprotein convertase subtilisin/kexin type 7 [Source:HGNC Symbol;Acc:HGNC:8748]	31.3333	38.6667	301.333	-0.420841	0.305746	2.35606	1.57556e-14	2.75821	8.72921e-49
ENSG00000126249	PDCD2L	programmed cell death 2 like [Source:HGNC Symbol;Acc:HGNC:28194]	40.3333	91	44.6667	0.739495	0.0343662	-0.526414	0.20005	-1.23118	8.40864e-08
ENSG00000105185	PDCD5	programmed cell death 5 [Source:HGNC Symbol;Acc:HGNC:8764]	206.667	499	354	0.849827	0.000510853	0.122413	0.668163	-0.697724	1.49798e-10
ENSG00000115539	PDCL3	phosducin like 3 [Source:HGNC Symbol;Acc:HGNC:28860]	43	73.3333	448.667	0.253258	0.418319	2.59462	4.29632e-23	2.41019	7.45018e-59
ENSG00000185527	PDE6G	phosphodiesterase 6G [Source:HGNC Symbol;Acc:HGNC:8789]	10.6667	3.66667	2	-2.20842	0.00259144	-3.34256	0.000243627	-1.05333	0.356631
ENSG00000073417	PDE8A	phosphodiesterase 8A [Source:HGNC Symbol;Acc:HGNC:8793]	22.3333	30.3333	188.333	-0.299278	0.517935	2.13678	1.78867e-09	2.42429	6.89674e-28
ENSG00000160191	PDE9A	phosphodiesterase 9A [Source:HGNC Symbol;Acc:HGNC:8795]	27.3333	42.6667	236	0.222757	0.602157	2.39632	1.87951e-11	2.26369	1.41879e-31
ENSG00000155660	PDIA4	protein disulfide isomerase family A member 4 [Source:HGNC Symbol;Acc:HGNC:30167]	1713	3721	2252.33	0.589584	0.000173786	-0.356587	0.040509	-0.926517	1.64881e-39
ENSG00000067840	PDZD4	PDZ domain containing 4 [Source:HGNC Symbol;Acc:HGNC:21167]	6.33333	22	158.333	1.34159	0.0365012	3.85836	2.61705e-17	2.64084	5.57464e-25
ENSG00000186862	PDZD7	PDZ domain containing 7 [Source:HGNC Symbol;Acc:HGNC:26257]	5.66667	6.33333	33	-0.503034	0.531138	1.67087	0.00391745	2.17642	6.55304e-06
ENSG00000121440	PDZRN3	PDZ domain containing ring finger 3 [Source:HGNC Symbol;Acc:HGNC:17704]	7	15.6667	169.667	0.661395	0.301367	3.78856	4.9851e-19	3.22545	6.00362e-32
ENSG00000173517	PEAK1	pseudopodium enriched atypical kinase 1 [Source:HGNC Symbol;Acc:HGNC:29431]	12.6667	20	119	-0.328352	0.598021	2.16676	4.43792e-06	2.37302	8.96786e-18
ENSG00000132326	PER2	period circadian regulator 2 [Source:HGNC Symbol;Acc:HGNC:8846]	6	10	63	0.283949	0.719279	2.61761	5.38411e-07	2.45556	1.10594e-10
ENSG00000100029	PES1	pescadillo ribosomal biogenesis factor 1 [Source:HGNC Symbol;Acc:HGNC:8848]	188	208.667	1497.33	-0.514287	0.0502339	2.11065	1.37016e-19	2.63465	3.59338e-117
ENSG00000162735	PEX19	peroxisomal biogenesis factor 19 [Source:HGNC Symbol;Acc:HGNC:9713]	73.3333	171.667	54.6667	0.711241	0.0117842	-1.18153	0.000106801	-1.85065	1.55944e-18
ENSG00000182405	PGBD4	piggyBac transposable element derived 4 [Source:HGNC Symbol;Acc:HGNC:19401]	4.66667	6.33333	53.6667	-0.206469	0.811744	2.68893	9.01045e-07	2.88991	1.58757e-10
ENSG00000119630	PGF	placental growth factor [Source:HGNC Symbol;Acc:HGNC:8893]	3.66667	16	27.6667	1.63542	0.0261724	2.148	0.00135035	0.591719	0.137928
ENSG00000197724	PHF2	PHD finger protein 2 [Source:HGNC Symbol;Acc:HGNC:8920]	31	60.3333	337.667	0.417505	0.214974	2.63236	1.52461e-22	2.27875	2.95849e-44
ENSG00000146247	PHIP	pleckstrin homology domain interacting protein [Source:HGNC Symbol;Acc:HGNC:15673]	121.333	158.333	998	-0.242963	0.346389	2.19288	9.63109e-28	2.4539	4.00921e-94
ENSG00000044446	PHKA2	phosphorylase kinase regulatory subunit alpha 2 [Source:HGNC Symbol;Acc:HGNC:8926]	32	40.3333	615	-0.175984	0.64276	3.47603	1.11308e-36	3.72462	1.42623e-109
ENSG00000181649	PHLDA2	pleckstrin homology like domain family A member 2 [Source:HGNC Symbol;Acc:HGNC:12385]	2	13.6667	18.3333	2.19409	0.0173323	2.37431	0.00700786	0.221739	0.640511
ENSG00000019144	PHLDB1	pleckstrin homology like domain family B member 1 [Source:HGNC Symbol;Acc:HGNC:23697]	33.6667	46.6667	267	0.0763808	0.855729	2.28667	4.80284e-11	2.31002	1.58886e-36
ENSG00000081913	PHLPP1	PH domain and leucine rich repeat protein phosphatase 1 [Source:HGNC Symbol;Acc:HGNC:20610]	13.6667	17.3333	95.6667	-0.11325	0.841264	2.03434	3.2271e-07	2.25562	6.17117e-14
ENSG00000040199	PHLPP2	PH domain and leucine rich repeat protein phosphatase 2 [Source:HGNC Symbol;Acc:HGNC:29149]	15.3333	22.3333	119.667	-0.0339618	0.942073	2.12985	6.00043e-09	2.21607	5.82751e-17
ENSG00000070047	PHRF1	PHD and ring finger domains 1 [Source:HGNC Symbol;Acc:HGNC:24351]	27.6667	28.6667	275.333	-0.416044	0.327636	2.54463	2.76577e-16	3.05817	5.27755e-49
ENSG00000241973	PI4KA	phosphatidylinositol 4-kinase alpha [Source:HGNC Symbol;Acc:HGNC:8983]	120.667	144.333	840.667	-0.195728	0.51638	2.10324	6.58271e-13	2.33949	5.7228e-79
ENSG00000183506	PI4KAP2	phosphatidylinositol 4-kinase alpha pseudogene 2 [Source:HGNC Symbol;Acc:HGNC:33577]	84.3333	109	654.667	-0.312551	0.325443	2.05963	2.36747e-14	2.38106	3.09824e-75
ENSG00000177595	PIDD1	p53-induced death domain protein 1 [Source:HGNC Symbol;Acc:HGNC:16491]	49.6667	62	352	-0.193152	0.531195	2.04089	6.03734e-16	2.30211	2.63936e-46
ENSG00000103335	PIEZO1	piezo type mechanosensitive ion channel component 1 [Source:HGNC Symbol;Acc:HGNC:28993]	79	121	795.667	0.0571744	0.839427	2.51632	1.33397e-28	2.51365	2.291e-84
ENSG00000140451	PIF1	PIF1 5'-to-3' DNA helicase [Source:HGNC Symbol;Acc:HGNC:26220]	14.3333	16	181	-0.419596	0.424858	2.8313	9.76108e-14	3.29111	3.2912e-33
ENSG00000165195	PIGA	phosphatidylinositol glycan anchor biosynthesis class A [Source:HGNC Symbol;Acc:HGNC:8957]	19	52.6667	10	0.964564	0.0242707	-1.69494	0.00295715	-2.60978	2.15415e-11
ENSG00000174227	PIGG	phosphatidylinositol glycan anchor biosynthesis class G [Source:HGNC Symbol;Acc:HGNC:25985]	25.6667	37.6667	281.333	0.127445	0.768123	2.70921	1.34202e-16	2.69446	1.3341e-45
ENSG00000133056	PIK3C2B	phosphatidylinositol-4-phosphate 3-kinase catalytic subunit type 2 beta [Source:HGNC Symbol;Acc:HGNC:8972]	6.66667	15.6667	104	0.354983	0.607882	2.99164	6.95149e-09	2.52855	1.24172e-17
ENSG00000117461	PIK3R3	phosphoinositide-3-kinase regulatory subunit 3 [Source:HGNC Symbol;Acc:HGNC:8981]	12.3333	25.6667	163	0.546119	0.27602	2.9279	6.06695e-16	2.46515	2.4205e-25
ENSG00000196455	PIK3R4	phosphoinositide-3-kinase regulatory subunit 4 [Source:HGNC Symbol;Acc:HGNC:8982]	36.3333	44.6667	299.333	-0.164779	0.666632	2.27424	1.86286e-14	2.53465	1.38969e-43
ENSG00000143398	PIP5K1A	phosphatidylinositol-4-phosphate 5-kinase type 1 alpha [Source:HGNC Symbol;Acc:HGNC:8994]	102	226	593.667	0.672702	0.00769358	1.8047	1.63866e-12	1.18426	1.38152e-24
ENSG00000110697	PITPNM1	phosphatidylinositol transfer protein membrane associated 1 [Source:HGNC Symbol;Acc:HGNC:9003]	22	31	204	-0.158999	0.714747	2.34997	8.19378e-14	2.51326	9.4428e-31
ENSG00000008710	PKD1	polycystin 1, transient receptor potential channel interacting [Source:HGNC Symbol;Acc:HGNC:9008]	17.6667	30.6667	845.667	0.33121	0.470028	4.79246	7.0609e-55	4.57775	1.45496e-145
ENSG00000118762	PKD2	polycystin 2, transient receptor potential cation channel [Source:HGNC Symbol;Acc:HGNC:9009]	15.3333	28.6667	144.333	0.355118	0.441103	2.41417	1.36683e-11	2.1241	2.76381e-19
ENSG00000171033	PKIA	cAMP-dependent protein kinase inhibitor alpha [Source:HGNC Symbol;Acc:HGNC:9017]	6.66667	29.3333	2.33333	1.68966	0.00426058	-2.12097	0.0650412	-3.86396	6.52995e-09
ENSG00000135549	PKIB	cAMP-dependent protein kinase inhibitor beta [Source:HGNC Symbol;Acc:HGNC:9018]	2.66667	21.6667	5.66667	2.52973	0.00108326	0.385379	0.722688	-2.13456	0.000161449
ENSG00000184381	PLA2G6	phospholipase A2 group VI [Source:HGNC Symbol;Acc:HGNC:9039]	12.6667	23	157	0.272358	0.574148	2.79316	4.41356e-15	2.56676	7.2473e-26
ENSG00000170965	PLAC1	placenta enriched 1 [Source:HGNC Symbol;Acc:HGNC:9044]	27.3333	12.6667	4.66667	-1.61789	0.000470926	-3.2711	3.14983e-06	-1.62778	0.0186401
ENSG00000101333	PLCB4	phospholipase C beta 4 [Source:HGNC Symbol;Acc:HGNC:9059]	15.3333	25	127.333	0.119524	0.80874	2.23238	2.79754e-10	2.14702	9.75332e-17
ENSG00000161714	PLCD3	phospholipase C delta 3 [Source:HGNC Symbol;Acc:HGNC:9061]	43.3333	59.3333	359	-0.0811384	0.807064	2.23954	3.93024e-19	2.38808	2.03599e-48
ENSG00000138193	PLCE1	phospholipase C epsilon 1 [Source:HGNC Symbol;Acc:HGNC:17175]	9.33333	21	169.333	0.392994	0.524234	3.28357	1.63264e-14	2.81217	8.07036e-27
ENSG00000124181	PLCG1	phospholipase C gamma 1 [Source:HGNC Symbol;Acc:HGNC:9065]	96.3333	110	893	-0.219849	0.475699	2.54232	3.6179e-18	2.81717	8.44345e-120
ENSG00000178209	PLEC	plectin [Source:HGNC Symbol;Acc:HGNC:9069]	45.3333	67.6667	533.333	0.151375	0.694164	2.84568	1.90287e-19	2.77366	7.89436e-71
ENSG00000105559	PLEKHA4	pleckstrin homology domain containing A4 [Source:HGNC Symbol;Acc:HGNC:14339]	32	9.33333	9.66667	-2.37169	7.06717e-07	-2.55211	5.05846e-07	-0.134261	0.827734
ENSG00000090924	PLEKHG2	pleckstrin homology and RhoGEF domain containing G2 [Source:HGNC Symbol;Acc:HGNC:29515]	25.6667	43.6667	366	0.236046	0.550486	3.02505	2.19104e-27	2.85983	1.38675e-57
ENSG00000126822	PLEKHG3	pleckstrin homology and RhoGEF domain containing G3 [Source:HGNC Symbol;Acc:HGNC:20364]	21	33.3333	337.667	0.166719	0.708785	3.20937	8.45885e-22	3.13182	1.99806e-58
ENSG00000196155	PLEKHG4	pleckstrin homology and RhoGEF domain containing G4 [Source:HGNC Symbol;Acc:HGNC:24501]	23	68.3333	666	1.06586	0.0041891	4.06516	5.22279e-46	3.08184	1.40464e-101
ENSG00000054690	PLEKHH1	pleckstrin homology, MyTH4 and FERM domain containing H1 [Source:HGNC Symbol;Acc:HGNC:17733]	21	28.6667	186.333	-0.17409	0.683253	2.28812	3.50622e-12	2.49313	1.91082e-28
ENSG00000116786	PLEKHM2	pleckstrin homology and RUN domain containing M2 [Source:HGNC Symbol;Acc:HGNC:29131]	134.333	154.667	1212.67	-0.298134	0.232346	2.41185	2.67421e-28	2.76354	4.98045e-137
ENSG00000147535	PLPP5	phospholipid phosphatase 5 [Source:HGNC Symbol;Acc:HGNC:25026]	40.6667	127.333	29.6667	1.04592	0.000430204	-1.31603	0.000200312	-2.30283	1.59084e-22
ENSG00000120594	PLXDC2	plexin domain containing 2 [Source:HGNC Symbol;Acc:HGNC:21013]	5.33333	22.3333	39.6667	1.60318	0.0200942	2.11535	0.00034116	0.618317	0.0770685
ENSG00000114554	PLXNA1	plexin A1 [Source:HGNC Symbol;Acc:HGNC:9099]	45	90	853	0.454703	0.145818	3.43766	2.91575e-47	3.03973	4.93151e-115
ENSG00000076356	PLXNA2	plexin A2 [Source:HGNC Symbol;Acc:HGNC:9100]	11	15.6667	121.333	0.0190019	0.972879	2.6761	4.14871e-11	2.74701	2.98093e-21
ENSG00000130827	PLXNA3	plexin A3 [Source:HGNC Symbol;Acc:HGNC:9101]	15	23.3333	230.667	-1.17073	0.128301	1.93463	0.0563696	3.10428	4.04586e-41
ENSG00000196576	PLXNB2	plexin B2 [Source:HGNC Symbol;Acc:HGNC:9104]	93.6667	185.333	1278	0.563918	0.0531483	3.09329	1.40895e-26	2.57971	6.95129e-130
ENSG00000004399	PLXND1	plexin D1 [Source:HGNC Symbol;Acc:HGNC:9107]	12	30	249.667	0.882302	0.0914388	3.61813	9.27656e-21	2.85404	2.68609e-41
ENSG00000132424	PNISR	PNN interacting serine and arginine rich protein [Source:HGNC Symbol;Acc:HGNC:21222]	197	256	1377	-0.193428	0.355095	1.99126	3.5301e-27	2.22184	9.94737e-115
ENSG00000006757	PNPLA4	patatin like phospholipase domain containing 4 [Source:HGNC Symbol;Acc:HGNC:24887]	0	19.3333	8.66667	5.59737	2.42269e-05	4.21637	0.0047162	-1.37357	0.00782725
ENSG00000143442	POGZ	pogo transposable element derived with ZNF domain [Source:HGNC Symbol;Acc:HGNC:18801]	91.3333	131	862	0.0532508	0.846277	2.51077	2.47411e-22	2.51331	1.07995e-100
ENSG00000177084	POLE	DNA polymerase epsilon, catalytic subunit [Source:HGNC Symbol;Acc:HGNC:9177]	129.667	146	1504.67	-0.407028	0.0930311	2.71539	1.39332e-45	3.16207	2.91371e-195
ENSG00000140521	POLG	DNA polymerase gamma, catalytic subunit [Source:HGNC Symbol;Acc:HGNC:9179]	93.3333	133.333	996.333	-0.0449694	0.872163	2.61252	1.041e-32	2.697	5.46344e-100
ENSG00000130997	POLN	DNA polymerase nu [Source:HGNC Symbol;Acc:HGNC:18870]	6.66667	10	130	0.0568116	0.937267	3.47838	4.69061e-14	3.49244	3.01003e-25
ENSG00000051341	POLQ	DNA polymerase theta [Source:HGNC Symbol;Acc:HGNC:9186]	27	34	430.333	-0.181578	0.662199	3.19918	3.60502e-31	3.4567	4.51465e-75
ENSG00000068654	POLR1A	RNA polymerase I subunit A [Source:HGNC Symbol;Acc:HGNC:17264]	48	74	607	-0.103932	0.786987	2.72049	8.49445e-20	2.82585	5.23213e-86
ENSG00000181222	POLR2A	RNA polymerase II subunit A [Source:HGNC Symbol;Acc:HGNC:9187]	85	135	890.667	0.267698	0.391264	2.71856	1.17068e-19	2.51473	7.01588e-108
ENSG00000105258	POLR2I	RNA polymerase II subunit I [Source:HGNC Symbol;Acc:HGNC:9196]	120.333	255	154	0.581592	0.0138244	-0.390121	0.149157	-0.930042	9.37979e-11
ENSG00000148606	POLR3A	RNA polymerase III subunit A [Source:HGNC Symbol;Acc:HGNC:30074]	118	134	932.333	-0.388626	0.108707	2.16007	8.08503e-28	2.59355	8.39257e-117
ENSG00000121851	POLR3GL	RNA polymerase III subunit GL [Source:HGNC Symbol;Acc:HGNC:28466]	65.3333	148.667	704.333	0.663229	0.0124752	2.64346	3.54198e-27	2.03748	1.29953e-65
ENSG00000104356	POP1	POP1 homolog, ribonuclease P/MRP subunit [Source:HGNC Symbol;Acc:HGNC:30129]	17.6667	33.6667	181	0.305198	0.536473	2.49665	2.68151e-11	2.22051	1.16494e-24
ENSG00000105171	POP4	POP4 homolog, ribonuclease P/MRP subunit [Source:HGNC Symbol;Acc:HGNC:30081]	57.3333	127.333	131	0.704702	0.0226488	0.491884	0.137937	-0.165123	0.324097
ENSG00000184486	POU3F2	POU class 3 homeobox 2 [Source:HGNC Symbol;Acc:HGNC:9215]	9	38.6667	30.3333	1.53008	0.00177225	0.899389	0.0781799	-0.557742	0.0707195
ENSG00000152192	POU4F1	POU class 4 homeobox 1 [Source:HGNC Symbol;Acc:HGNC:9218]	49.6667	118.667	141.333	0.799246	0.0128268	0.805049	0.0206548	0.0460568	0.79847
ENSG00000184271	POU6F1	POU class 6 homeobox 1 [Source:HGNC Symbol;Acc:HGNC:9224]	5.33333	10.3333	79.3333	0.115623	0.878782	2.93626	1.08882e-07	2.73375	1.57078e-14
ENSG00000138777	PPA2	inorganic pyrophosphatase 2 [Source:HGNC Symbol;Acc:HGNC:28883]	86.3333	177	80.3333	0.575944	0.03672	-0.803024	0.0119882	-1.34286	3.27086e-14
ENSG00000155846	PPARGC1B	PPARG coactivator 1 beta [Source:HGNC Symbol;Acc:HGNC:30022]	13	22.3333	178	0.182694	0.708494	2.93244	3.2432e-15	2.78668	3.04917e-28
ENSG00000166387	PPFIBP2	PPFIA binding protein 2 [Source:HGNC Symbol;Acc:HGNC:9250]	3.33333	5.66667	36	0.1572	0.870656	2.5706	6.30688e-05	2.44829	9.64358e-07
ENSG00000168938	PPIC	peptidylprolyl isomerase C [Source:HGNC Symbol;Acc:HGNC:9256]	78.3333	167.333	18	0.625362	0.0246313	-2.81453	4.58355e-12	-3.41966	6.63468e-39
ENSG00000168781	PPIP5K1	diphosphoinositol pentakisphosphate kinase 1 [Source:HGNC Symbol;Acc:HGNC:29023]	14.6667	19.3333	250.333	-0.0704572	0.891336	3.31547	3.2669e-19	3.48409	6.51013e-45
ENSG00000145725	PPIP5K2	diphosphoinositol pentakisphosphate kinase 2 [Source:HGNC Symbol;Acc:HGNC:29035]	40.3333	61.3333	306.667	0.145395	0.684809	2.18955	2.5564e-12	2.11466	5.5951e-34
ENSG00000204569	PPP1R10	protein phosphatase 1 regulatory subunit 10 [Source:HGNC Symbol;Acc:HGNC:9284]	9.66667	15	92	0.128519	0.823091	2.45545	1.11023e-08	2.4088	7.89987e-15
ENSG00000077157	PPP1R12B	protein phosphatase 1 regulatory subunit 12B [Source:HGNC Symbol;Acc:HGNC:7619]	8.66667	14	189.667	0.107546	0.853307	3.62262	5.00145e-21	3.55522	4.6227e-38
ENSG00000125503	PPP1R12C	protein phosphatase 1 regulatory subunit 12C [Source:HGNC Symbol;Acc:HGNC:14947]	79	98	731	-0.256946	0.369905	2.38899	2.27567e-21	2.68868	9.18922e-78
ENSG00000088808	PPP1R13B	protein phosphatase 1 regulatory subunit 13B [Source:HGNC Symbol;Acc:HGNC:14950]	18	22.6667	181.667	-0.431847	0.397816	2.4012	2.60178e-10	2.79852	1.27382e-31
ENSG00000167641	PPP1R14A	protein phosphatase 1 regulatory inhibitor subunit 14A [Source:HGNC Symbol;Acc:HGNC:14871]	13.6667	43	20.6667	1.1016	0.0102136	-0.205504	0.692811	-1.25089	0.000262523
ENSG00000135447	PPP1R1A	protein phosphatase 1 regulatory inhibitor subunit 1A [Source:HGNC Symbol;Acc:HGNC:9286]	5.33333	22	37.3333	1.42725	0.0212283	1.92616	0.000761908	0.553378	0.105251
ENSG00000066027	PPP2R5A	protein phosphatase 2 regulatory subunit B'alpha [Source:HGNC Symbol;Acc:HGNC:9309]	28.3333	71.3333	85.6667	0.855575	0.0179096	0.846142	0.0161131	0.0577234	0.785527
ENSG00000100796	PPP4R3A	protein phosphatase 4 regulatory subunit 3A [Source:HGNC Symbol;Acc:HGNC:20219]	128.333	158.667	1048.33	-0.334899	0.20694	2.15827	6.17976e-25	2.51563	2.21022e-117
ENSG00000100239	PPP6R2	protein phosphatase 6 regulatory subunit 2 [Source:HGNC Symbol;Acc:HGNC:19253]	54.6667	86.3333	526.667	0.130033	0.660583	2.47753	2.53645e-24	2.40789	6.50374e-63
ENSG00000148840	PPRC1	PPARG related coactivator 1 [Source:HGNC Symbol;Acc:HGNC:30025]	161	166.333	1629.67	-0.417083	0.0934694	2.626	2.55915e-27	3.08593	3.34202e-180
ENSG00000185686	PRAME	PRAME nuclear receptor transcriptional regulator [Source:HGNC Symbol;Acc:HGNC:9336]	45.3333	69.3333	376.333	0.000292504	0.999277	2.2061	2.10552e-18	2.23685	1.59347e-44
ENSG00000170325	PRDM10	PR/SET domain 10 [Source:HGNC Symbol;Acc:HGNC:13995]	10.6667	15	79	-0.080542	0.884898	2.05744	6.24635e-07	2.19013	8.90692e-12
ENSG00000019485	PRDM11	PR/SET domain 11 [Source:HGNC Symbol;Acc:HGNC:13996]	7	8.66667	61.6667	-0.254641	0.71622	2.31937	1.1403e-06	2.6294	1.38754e-11
ENSG00000141956	PRDM15	PR/SET domain 15 [Source:HGNC Symbol;Acc:HGNC:13999]	11.3333	16.6667	160.667	-0.0877463	0.877278	2.97492	2.46513e-15	3.0629	2.79899e-28
ENSG00000123131	PRDX4	peroxiredoxin 4 [Source:HGNC Symbol;Acc:HGNC:17169]	524.667	1089.33	138.333	0.465874	0.00977028	-2.7347	2.07274e-37	-3.17909	2.07843e-154
ENSG00000124126	PREX1	phosphatidylinositol-3,4,5-trisphosphate dependent Rac exchange factor 1 [Source:HGNC Symbol;Acc:HGNC:32594]	6.33333	8.33333	55.3333	-0.0429297	0.955968	2.35108	5.56119e-06	2.52522	2.74155e-10
ENSG00000139174	PRICKLE1	prickle planar cell polarity protein 1 [Source:HGNC Symbol;Acc:HGNC:17019]	6.33333	22	44.6667	1.27844	0.0308619	2.01794	0.000160117	0.819955	0.0135419
ENSG00000253729	PRKDC	protein kinase, DNA-activated, catalytic subunit [Source:HGNC Symbol;Acc:HGNC:9413]	153	306	1904.67	0.424269	0.051925	2.81904	1.83287e-50	2.43584	6.71488e-156
ENSG00000128563	PRKRIP1	PRKR interacting protein 1 [Source:HGNC Symbol;Acc:HGNC:21894]	48.3333	61.3333	980	-0.133241	0.685376	3.58154	8.41344e-43	3.79176	1.90517e-162
ENSG00000167525	PROCA1	protein interacting with cyclin A1 [Source:HGNC Symbol;Acc:HGNC:28600]	10.3333	12.3333	71.6667	-0.131233	0.846023	2.04138	8.15453e-06	2.33012	8.3862e-12
ENSG00000117360	PRPF3	pre-mRNA processing factor 3 [Source:HGNC Symbol;Acc:HGNC:17348]	44.6667	67.3333	612	0.278503	0.541596	3.15752	1.1446e-15	2.97533	2.29185e-88
ENSG00000185246	PRPF39	pre-mRNA processing factor 39 [Source:HGNC Symbol;Acc:HGNC:20314]	67.6667	76.3333	846.667	-0.35398	0.203959	2.8527	1.41017e-37	3.2664	1.8684e-133
ENSG00000196504	PRPF40A	pre-mRNA processing factor 40 homolog A [Source:HGNC Symbol;Acc:HGNC:16463]	320.333	452.333	2293.67	-0.0314109	0.870579	2.07389	5.96967e-28	2.13898	2.84929e-125
ENSG00000112739	PRPF4B	pre-mRNA processing factor 4B [Source:HGNC Symbol;Acc:HGNC:17346]	101.667	135.667	820	-0.111471	0.661614	2.23351	1.14501e-23	2.39523	2.16884e-83
ENSG00000101161	PRPF6	pre-mRNA processing factor 6 [Source:HGNC Symbol;Acc:HGNC:15860]	153.333	187.667	1736.33	-0.457954	0.123225	2.55104	2.0366e-26	3.00098	5.71721e-199
ENSG00000174231	PRPF8	pre-mRNA processing factor 8 [Source:HGNC Symbol;Acc:HGNC:17340]	106.333	138.667	1398.33	-0.0316488	0.914763	3.04498	5.08284e-26	3.13104	4.12012e-177
ENSG00000212123	PRR22	proline rich 22 [Source:HGNC Symbol;Acc:HGNC:28354]	20.6667	28.6667	327.667	-0.0669578	0.871989	3.17637	6.04383e-25	3.30707	4.46724e-57
ENSG00000204469	PRRC2A	proline rich coiled-coil 2A [Source:HGNC Symbol;Acc:HGNC:13918]	55.3333	82.3333	695	0.236673	0.558204	3.02989	1.02063e-16	2.87262	7.97158e-103
ENSG00000117523	PRRC2C	proline rich coiled-coil 2C [Source:HGNC Symbol;Acc:HGNC:24903]	371	560.667	2932.33	0.0113054	0.959332	2.17073	1.92637e-25	2.17969	9.32218e-130
ENSG00000116132	PRRX1	paired related homeobox 1 [Source:HGNC Symbol;Acc:HGNC:9142]	2.33333	21	4.33333	2.52069	0.00226072	-0.126133	0.912316	-2.48409	4.65639e-05
ENSG00000164099	PRSS12	serine protease 12 [Source:HGNC Symbol;Acc:HGNC:9477]	5.33333	7	38.3333	-0.0350912	0.968119	2.08572	0.000402279	2.2529	1.35768e-06
ENSG00000099256	PRTFDC1	phosphoribosyl transferase domain containing 1 [Source:HGNC Symbol;Acc:HGNC:23333]	28.6667	105	41	1.35325	3.08138e-05	-0.267571	0.485144	-1.56176	4.0641e-12
ENSG00000106772	PRUNE2	prune homolog 2 with BCH domain [Source:HGNC Symbol;Acc:HGNC:25209]	0	11.6667	19.6667	4.84286	0.000513668	5.4119	4.15115e-05	0.559507	0.236569
ENSG00000135069	PSAT1	phosphoserine aminotransferase 1 [Source:HGNC Symbol;Acc:HGNC:19129]	187.333	543.667	129	1.17392	5.79373e-05	-1.12899	0.00141188	-2.27657	8.39352e-68
ENSG00000205155	PSENEN	presenilin enhancer, gamma-secretase subunit [Source:HGNC Symbol;Acc:HGNC:30100]	35.6667	84.6667	10	0.677778	0.0316504	-2.67455	3.44086e-09	-3.28613	1.51333e-21
ENSG00000172775	PSME3IP1	proteasome activator subunit 3 interacting protein 1 [Source:HGNC Symbol;Acc:HGNC:29856]	73.3333	112.667	680.667	0.0745075	0.784815	2.4116	7.68576e-27	2.39002	1.39628e-74
ENSG00000121390	PSPC1	paraspeckle component 1 [Source:HGNC Symbol;Acc:HGNC:20320]	67.3333	92	476	-0.0840677	0.788407	2.03309	1.60049e-18	2.16946	6.49702e-43
ENSG00000106246	PTCD1	pentatricopeptide repeat domain 1 [Source:HGNC Symbol;Acc:HGNC:22198]	22	46	391	0.612842	0.150388	3.38701	2.70573e-26	2.88042	1.79388e-61
ENSG00000120899	PTK2B	protein tyrosine kinase 2 beta [Source:HGNC Symbol;Acc:HGNC:9612]	3.33333	4	23	-0.152461	0.891511	2.02072	0.00413039	2.31775	0.000114148
ENSG00000119383	PTPA	protein phosphatase 2 phosphatase activator [Source:HGNC Symbol;Acc:HGNC:9308]	78.6667	161.667	140	0.66992	0.0488898	0.230595	0.548251	-0.408583	0.011633
ENSG00000132670	PTPRA	protein tyrosine phosphatase receptor type A [Source:HGNC Symbol;Acc:HGNC:9664]	74.6667	100.333	906.333	-0.162488	0.592687	2.77444	7.23147e-35	2.97012	4.26558e-38
ENSG00000173482	PTPRM	protein tyrosine phosphatase receptor type M [Source:HGNC Symbol;Acc:HGNC:9675]	12	14	175.667	-0.375904	0.513497	3.03104	2.46167e-17	3.43954	4.40261e-34
ENSG00000105426	PTPRS	protein tyrosine phosphatase receptor type S [Source:HGNC Symbol;Acc:HGNC:9681]	158.333	179.667	1242.33	-0.354259	0.122814	2.17444	3.22379e-30	2.58201	1.87176e-140
ENSG00000160953	PWWP3A	PWWP domain containing 3A, DNA repair factor [Source:HGNC Symbol;Acc:HGNC:29641]	45.6667	65.6667	533.333	-0.175365	0.625399	2.64534	3.23222e-20	2.82199	3.26412e-72
ENSG00000100994	PYGB	glycogen phosphorylase B [Source:HGNC Symbol;Acc:HGNC:9723]	34	40.3333	221.667	-0.488961	0.225827	1.77589	4.43351e-08	2.25811	4.31936e-29
ENSG00000115828	QPCT	glutaminyl-peptide cyclotransferase [Source:HGNC Symbol;Acc:HGNC:9753]	9.33333	87.6667	16	2.63722	1.11116e-08	-0.148005	0.862723	-2.69165	0.000968939
ENSG00000186867	QRFPR	pyroglutamylated RFamide peptide receptor [Source:HGNC Symbol;Acc:HGNC:15565]	0.666667	11.3333	11	3.28011	0.00317023	3.01436	0.0107616	-0.236037	0.674836
ENSG00000129646	QRICH2	glutamine rich 2 [Source:HGNC Symbol;Acc:HGNC:25326]	7.33333	9.33333	81	-0.262782	0.686763	2.60944	9.7867e-08	2.90705	1.10131e-14
ENSG00000135631	RAB11FIP5	RAB11 family interacting protein 5 [Source:HGNC Symbol;Acc:HGNC:24845]	38	54.6667	279.667	-0.0181398	0.958611	2.07513	1.07806e-12	2.14965	4.76957e-34
ENSG00000157869	RAB28	RAB28, member RAS oncogene family [Source:HGNC Symbol;Acc:HGNC:9768]	25.6667	68.3333	11.3333	0.865356	0.0105701	-1.99322	4.28707e-05	-2.79965	7.84487e-16
ENSG00000155961	RAB39B	RAB39B, member RAS oncogene family [Source:HGNC Symbol;Acc:HGNC:16499]	31	71.6667	10	0.685811	0.0349323	-2.40719	1.6735e-06	-3.04816	2.45198e-17
ENSG00000105404	RABAC1	Rab acceptor 1 [Source:HGNC Symbol;Acc:HGNC:9794]	302.667	639.667	85	0.505614	0.00835712	-2.63798	5.50231e-35	-3.11381	3.3614e-109
ENSG00000011454	RABGAP1	RAB GTPase activating protein 1 [Source:HGNC Symbol;Acc:HGNC:17155]	36.3333	53.6667	424.667	-0.0253164	0.944055	2.72286	2.09331e-23	2.78336	2.73854e-58
ENSG00000079974	RABL2B	RAB, member of RAS oncogene family like 2B [Source:HGNC Symbol;Acc:HGNC:9800]	22.3333	58.6667	47.3333	0.875464	0.0231331	0.285436	0.442445	-0.520543	0.0452614
ENSG00000196642	RABL6	RAB, member RAS oncogene family like 6 [Source:HGNC Symbol;Acc:HGNC:24703]	489	786	5398	-0.106652	0.703467	2.48629	7.94492e-26	2.57333	1.04392e-267
ENSG00000197275	RAD54B	RAD54 homolog B [Source:HGNC Symbol;Acc:HGNC:17228]	21.6667	26.6667	140	-0.437388	0.355186	1.78542	2.51789e-07	2.19333	5.81278e-19
ENSG00000157927	RADIL	Rap associating with DIL domain [Source:HGNC Symbol;Acc:HGNC:22226]	37.3333	38.6667	200.667	-0.448614	0.234539	1.64239	2.52887e-08	2.17009	1.34236e-26
ENSG00000147231	RADX	RPA1 related single stranded DNA binding protein, X-linked [Source:HGNC Symbol;Acc:HGNC:25486]	53	146.333	639.667	0.984058	0.00175673	2.85614	1.89485e-21	1.92746	7.8915e-50
ENSG00000108557	RAI1	retinoic acid induced 1 [Source:HGNC Symbol;Acc:HGNC:9834]	33	53.3333	862.333	0.359204	0.435025	4.04775	8.63539e-28	3.80783	3.59005e-145
ENSG00000174373	RALGAPA1	Ral GTPase activating protein catalytic subunit alpha 1 [Source:HGNC Symbol;Acc:HGNC:17770]	44.3333	65.3333	456.667	0.0457329	0.88485	2.58568	2.77762e-19	2.59598	6.49549e-53
ENSG00000188559	RALGAPA2	Ral GTPase activating protein catalytic subunit alpha 2 [Source:HGNC Symbol;Acc:HGNC:16207]	13.3333	24	139	0.156648	0.776733	2.47464	8.65401e-09	2.3271	5.23138e-20
ENSG00000170471	RALGAPB	Ral GTPase activating protein non-catalytic subunit beta [Source:HGNC Symbol;Acc:HGNC:29221]	36.6667	67.6667	376.667	0.42306	0.255867	2.6213	7.02083e-16	2.2709	5.21369e-47
ENSG00000160271	RALGDS	ral guanine nucleotide dissociation stimulator [Source:HGNC Symbol;Acc:HGNC:9842]	50.6667	78.6667	821.333	0.159412	0.630141	3.27045	1.59479e-29	3.17531	7.07572e-111
ENSG00000204764	RANBP17	RAN binding protein 17 [Source:HGNC Symbol;Acc:HGNC:14428]	10.3333	13.6667	95.3333	-0.355633	0.597326	2.28256	2.96482e-07	2.59419	9.01518e-16
ENSG00000153201	RANBP2	RAN binding protein 2 [Source:HGNC Symbol;Acc:HGNC:9848]	111.333	120.667	693.667	-0.464091	0.0572877	1.81277	1.57348e-19	2.31909	1.25052e-81
ENSG00000100401	RANGAP1	Ran GTPase activating protein 1 [Source:HGNC Symbol;Acc:HGNC:9854]	226.333	316.333	1896.67	-0.395112	0.229338	2.01478	1.02085e-12	2.37896	1.13093e-168
ENSG00000107263	RAPGEF1	Rap guanine nucleotide exchange factor 1 [Source:HGNC Symbol;Acc:HGNC:4568]	60	84.3333	450.667	-0.240069	0.480141	1.97784	1.06115e-12	2.21473	3.30643e-52
ENSG00000109756	RAPGEF2	Rap guanine nucleotide exchange factor 2 [Source:HGNC Symbol;Acc:HGNC:16854]	18	20.6667	110.333	-0.116828	0.854758	1.89919	7.38649e-06	2.2029	1.58899e-14
ENSG00000108352	RAPGEFL1	Rap guanine nucleotide exchange factor like 1 [Source:HGNC Symbol;Acc:HGNC:17428]	4.33333	9.33333	73.6667	0.474603	0.559133	3.25062	7.69304e-10	2.77815	1.99324e-13
ENSG00000075391	RASAL2	RAS protein activator like 2 [Source:HGNC Symbol;Acc:HGNC:9874]	11.6667	34	136.667	1.04159	0.0312714	2.75053	2.37292e-13	1.80135	2.05006e-15
ENSG00000113319	RASGRF2	Ras protein specific guanine nucleotide releasing factor 2 [Source:HGNC Symbol;Acc:HGNC:9876]	7.33333	9.33333	49.6667	-0.170467	0.812111	1.95007	7.28398e-05	2.20335	7.98257e-08
ENSG00000122257	RBBP6	RB binding protein 6, ubiquitin ligase [Source:HGNC Symbol;Acc:HGNC:9889]	124.333	158	1131	-0.180168	0.452805	2.40187	3.46624e-29	2.6342	1.58038e-135
ENSG00000239306	RBM14	RNA binding motif protein 14 [Source:HGNC Symbol;Acc:HGNC:14219]	36.6667	103.667	171	0.88171	0.00603158	1.35301	4.88962e-06	0.519614	0.00212649
ENSG00000122965	RBM19	RNA binding motif protein 19 [Source:HGNC Symbol;Acc:HGNC:29098]	53.3333	65	584.667	-0.16628	0.623743	2.72184	4.33601e-22	2.9637	4.1455e-90
ENSG00000203867	RBM20	RNA binding motif protein 20 [Source:HGNC Symbol;Acc:HGNC:27424]	21	35.6667	297	0.05478	0.903527	2.91921	6.81473e-19	2.85109	3.24178e-48
ENSG00000119707	RBM25	RNA binding motif protein 25 [Source:HGNC Symbol;Acc:HGNC:23244]	263.667	339.667	1786	-0.243774	0.270777	1.92028	1.78902e-26	2.18814	1.33008e-132
ENSG00000139746	RBM26	RNA binding motif protein 26 [Source:HGNC Symbol;Acc:HGNC:20327]	233.333	429.667	4037.67	0.312641	0.119385	3.30345	1.15082e-79	3.02798	5.71388e-301
ENSG00000184863	RBM33	RNA binding motif protein 33 [Source:HGNC Symbol;Acc:HGNC:27223]	45	69	819.667	0.0893155	0.772896	3.38483	4.25006e-46	3.36513	9.47173e-135
ENSG00000126254	RBM42	RNA binding motif protein 42 [Source:HGNC Symbol;Acc:HGNC:28117]	115	230.333	304.667	0.615723	0.0379557	0.769554	0.0173138	0.198525	0.120371
ENSG00000003756	RBM5	RNA binding motif protein 5 [Source:HGNC Symbol;Acc:HGNC:9902]	95.6667	135.333	941.333	0.052605	0.849097	2.58592	4.21683e-23	2.59438	2.47861e-111
ENSG00000004534	RBM6	RNA binding motif protein 6 [Source:HGNC Symbol;Acc:HGNC:9903]	59.3333	78	642.667	-0.0923297	0.76159	2.67647	2.32215e-26	2.84019	4.3424e-91
ENSG00000153250	RBMS1	RNA binding motif single stranded interacting protein 1 [Source:HGNC Symbol;Acc:HGNC:9907]	53	114.333	58	0.60395	0.0344404	-0.637993	0.0429337	-1.18542	4.37127e-09
ENSG00000168214	RBPJ	recombination signal binding protein for immunoglobulin kappa J region [Source:HGNC Symbol;Acc:HGNC:5724]	70.6667	178.667	93.3333	0.835061	0.00175895	-0.357284	0.227695	-1.14268	5.87316e-11
ENSG00000135870	RC3H1	ring finger and CCCH-type domains 1 [Source:HGNC Symbol;Acc:HGNC:29434]	23.3333	34	342.667	-0.081538	0.849119	3.03732	1.71908e-26	3.13113	1.10811e-55
ENSG00000166965	RCCD1	RCC1 domain containing 1 [Source:HGNC Symbol;Acc:HGNC:30457]	47	110.333	156.333	0.668361	0.0258838	0.910537	0.00155108	0.30013	0.0783581
ENSG00000160957	RECQL4	RecQ like helicase 4 [Source:HGNC Symbol;Acc:HGNC:9949]	132.333	168	1094	-0.199927	0.425365	2.25857	2.34877e-23	2.49654	9.12458e-95
ENSG00000108469	RECQL5	RecQ like helicase 5 [Source:HGNC Symbol;Acc:HGNC:9950]	33	45	415.667	-0.0520979	0.888678	2.86447	1.33569e-26	3.00125	4.78618e-67
ENSG00000154153	RETREG1	reticulophagy regulator 1 [Source:HGNC Symbol;Acc:HGNC:25964]	11.3333	33.3333	12.6667	0.997287	0.0310165	-0.661729	0.253245	-1.59494	8.36915e-05
ENSG00000135945	REV1	REV1 DNA directed polymerase [Source:HGNC Symbol;Acc:HGNC:14060]	32.6667	45	320	-0.0904868	0.797288	2.48115	3.69613e-20	2.62555	6.97979e-47
ENSG00000009413	REV3L	REV3 like, DNA directed polymerase zeta catalytic subunit [Source:HGNC Symbol;Acc:HGNC:9968]	8.66667	21	228	0.826355	0.161522	3.93271	3.23534e-22	3.23316	2.84513e-42
ENSG00000079313	REXO1	RNA exonuclease 1 homolog [Source:HGNC Symbol;Acc:HGNC:24616]	42.6667	51	402.667	-0.28833	0.388771	2.43133	2.7562e-19	2.77679	4.73632e-61
ENSG00000153165	RGPD3	RANBP2 like and GRIP domain containing 3 [Source:HGNC Symbol;Acc:HGNC:32416]	11.6667	14	79.6667	-0.382084	0.516271	1.8922	1.96307e-05	2.30185	5.21415e-13
ENSG00000196862	RGPD4	RANBP2 like and GRIP domain containing 4 [Source:HGNC Symbol;Acc:HGNC:32417]	9.66667	12.3333	80.6667	-0.0657514	0.924724	2.30958	4.30886e-07	2.50531	1.17532e-13
ENSG00000015568	RGPD5	RANBP2 like and GRIP domain containing 5 [Source:HGNC Symbol;Acc:HGNC:32418]	29	36.3333	342.333	-0.1432	0.719569	2.79838	3.45091e-20	3.02889	4.92459e-58
ENSG00000183054	RGPD6	RANBP2 like and GRIP domain containing 6 [Source:HGNC Symbol;Acc:HGNC:32419]	21.3333	35	344.333	0.143261	0.731131	3.17674	8.36248e-26	3.08947	1.61446e-59
ENSG00000169629	RGPD8	RANBP2 like and GRIP domain containing 8 [Source:HGNC Symbol;Acc:HGNC:9849]	21	32.6667	339.333	0.137239	0.755987	3.22698	1.38973e-26	3.17334	5.08309e-58
ENSG00000143333	RGS16	regulator of G protein signaling 16 [Source:HGNC Symbol;Acc:HGNC:9997]	12	38	59	1.1682	0.0119038	1.51088	0.000491272	0.423812	0.115767
ENSG00000072422	RHOBTB1	Rho related BTB domain containing 1 [Source:HGNC Symbol;Acc:HGNC:18738]	10.6667	31.3333	72.6667	1.03098	0.0332725	1.97194	2.45828e-06	1.01278	0.000152622
ENSG00000158106	RHPN1	rhophilin Rho GTPase binding protein 1 [Source:HGNC Symbol;Acc:HGNC:19973]	17	28	193.667	0.133051	0.766396	2.67087	7.90313e-15	2.58441	5.0156e-30
ENSG00000128408	RIBC2	RIB43A domain with coiled-coils 2 [Source:HGNC Symbol;Acc:HGNC:13241]	6	6.33333	37	-0.34832	0.698009	1.86342	0.00103156	2.35003	1.06881e-06
ENSG00000107036	RIC1	RIC1 homolog, RAB6A GEF complex partner 1 [Source:HGNC Symbol;Acc:HGNC:17686]	10.6667	13.6667	99	-0.145454	0.803166	2.41028	3.8281e-09	2.64916	1.09779e-17
ENSG00000080345	RIF1	replication timing regulatory factor 1 [Source:HGNC Symbol;Acc:HGNC:23207]	80.6667	129	726.333	0.208724	0.454941	2.44059	7.68116e-21	2.28923	7.61206e-77
ENSG00000117016	RIMS3	regulating synaptic membrane exocytosis 3 [Source:HGNC Symbol;Acc:HGNC:21292]	6	23.3333	18.6667	1.42548	0.0141943	0.822042	0.208119	-0.534616	0.188189
ENSG00000135249	RINT1	RAD50 interactor 1 [Source:HGNC Symbol;Acc:HGNC:21876]	45.3333	64.6667	327.333	0.151914	0.707647	2.19786	1.02439e-09	2.13248	4.18247e-40
ENSG00000137275	RIPK1	receptor interacting serine/threonine kinase 1 [Source:HGNC Symbol;Acc:HGNC:10019]	27.6667	42	211.667	0.171384	0.686325	2.2019	2.71608e-10	2.12612	3.15383e-27
ENSG00000108830	RND2	Rho family GTPase 2 [Source:HGNC Symbol;Acc:HGNC:18315]	7.66667	47	8	2.12473	4.72855e-05	-0.638762	0.406987	-2.7595	2.12097e-11
ENSG00000164068	RNF123	ring finger protein 123 [Source:HGNC Symbol;Acc:HGNC:21148]	30	30.3333	164.667	-0.489721	0.226248	1.66507	1.28209e-07	2.22879	3.67669e-22
ENSG00000173821	RNF213	ring finger protein 213 [Source:HGNC Symbol;Acc:HGNC:14539]	42.6667	63.6667	697.333	-0.0425867	0.896211	3.17457	1.66988e-37	3.24839	2.41155e-111
ENSG00000011275	RNF216	ring finger protein 216 [Source:HGNC Symbol;Acc:HGNC:21698]	63	88.6667	688.667	-0.142418	0.652885	2.58558	1.16957e-25	2.75242	5.53114e-98
ENSG00000179859	RNF227	ring finger protein 227 [Source:HGNC Symbol;Acc:HGNC:27571]	19.3333	8.66667	4.66667	-1.67171	0.00327958	-2.80279	9.24889e-06	-1.08826	0.132107
ENSG00000103549	RNF40	ring finger protein 40 [Source:HGNC Symbol;Acc:HGNC:16867]	189	260.333	1352.67	-0.0581227	0.785249	2.07254	3.58408e-25	2.17392	3.99009e-104
ENSG00000185946	RNPC3	RNA binding region (RNP1, RRM) containing 3 [Source:HGNC Symbol;Acc:HGNC:18666]	17.6667	31	214	0.200869	0.664542	2.76278	5.86774e-18	2.58595	7.07065e-32
ENSG00000176393	RNPEP	arginyl aminopeptidase [Source:HGNC Symbol;Acc:HGNC:10078]	120.333	250.667	196	0.630345	0.0230331	0.0291903	0.923221	-0.561633	6.15415e-05
ENSG00000169855	ROBO1	roundabout guidance receptor 1 [Source:HGNC Symbol;Acc:HGNC:10249]	91.3333	104.333	713	-0.264766	0.35185	2.24324	3.43828e-18	2.56856	1.23407e-93
ENSG00000125995	ROMO1	reactive oxygen species modulator 1 [Source:HGNC Symbol;Acc:HGNC:16185]	635.667	1280	85	0.531029	0.00357933	-3.60732	9.45982e-50	-4.11535	5.37231e-239
ENSG00000197498	RPF2	ribosome production factor 2 homolog [Source:HGNC Symbol;Acc:HGNC:20870]	237.333	272.333	1716.33	-0.390871	0.0625129	2.02762	3.56871e-28	2.44897	3.69898e-139
ENSG00000214914	RPL23AP3	ribosomal protein L23a pseudogene 3 [Source:HGNC Symbol;Acc:HGNC:10320]	27.3333	9.66667	52.6667	-1.90048	0.000477713	0.262153	0.552172	2.24635	1.27804e-08
ENSG00000243265	RPL23AP55	ribosomal protein L23a pseudogene 55 [Source:HGNC Symbol;Acc:HGNC:35997]	5	5.33333	50.3333	-0.470823	0.565156	2.49928	2.33269e-06	3.03056	7.33162e-11
ENSG00000228657	RPL23AP58	ribosomal protein L23a pseudogene 58 [Source:HGNC Symbol;Acc:HGNC:36138]	3.33333	4.66667	33	0.024544	0.982466	2.52749	0.000138217	2.6194	1.4449e-06
ENSG00000269244	RPL23AP78	ribosomal protein L23a pseudogene 78 [Source:HGNC Symbol;Acc:HGNC:35518]	64.6667	5.33333	33.6667	-4.10011	3.71573e-16	-1.68952	6.80933e-07	2.46176	1.42486e-06
ENSG00000213891	RPL3P6	ribosomal protein L3 pseudogene 6 [Source:HGNC Symbol;Acc:HGNC:36395]	17.3333	25.3333	145.667	-0.108571	0.819061	2.18581	2.13656e-09	2.31685	2.07048e-21
ENSG00000225093	RPL3P7	ribosomal protein L3 pseudogene 7 [Source:HGNC Symbol;Acc:HGNC:36797]	20.3333	22.6667	130.333	-0.219967	0.697477	1.98098	1.38891e-06	2.31953	1.47296e-18
ENSG00000243859	RPL5P17	ribosomal protein L5 pseudogene 17 [Source:HGNC Symbol;Acc:HGNC:36605]	832.333	999.667	5263.33	0.0286537	0.938054	2.17172	2.332e-07	2.19662	6.06535e-155
ENSG00000244052	RPL5P24	ribosomal protein L5 pseudogene 24 [Source:HGNC Symbol;Acc:HGNC:35828]	85.6667	106.333	542.667	-0.10163	0.751494	1.99443	1.87536e-10	2.14741	3.95735e-54
ENSG00000213051	RPL5P5	ribosomal protein L5 pseudogene 5 [Source:HGNC Symbol;Acc:HGNC:35564]	551.667	669	3867.33	-0.00836423	0.9791	2.27229	5.43432e-10	2.32368	4.21016e-163
ENSG00000232393	RPL5P6	ribosomal protein L5 pseudogene 6 [Source:HGNC Symbol;Acc:HGNC:35890]	11	14	109	-0.031787	0.961151	2.58447	3.14396e-08	2.75436	2.8058e-19
ENSG00000213433	RPLP1P6	ribosomal protein lateral stalk subunit P1 pseudogene 6 [Source:HGNC Symbol;Acc:HGNC:35809]	8.33333	27.6667	6	1.12555	0.0348036	-1.36511	0.0598447	-2.40909	2.02579e-06
ENSG00000178718	RPP25	ribonuclease P and MRP subunit p25 [Source:HGNC Symbol;Acc:HGNC:30361]	53.3333	115	252.667	0.671231	0.0386009	1.54979	1.32338e-06	0.934314	8.79101e-10
ENSG00000177519	RPRM	reprimo, TP53 dependent G2 arrest mediator homolog [Source:HGNC Symbol;Acc:HGNC:24201]	2	22.6667	18.3333	2.96714	0.000165919	2.40682	0.00376144	-0.505699	0.207699
ENSG00000179673	RPRML	reprimo like [Source:HGNC Symbol;Acc:HGNC:32422]	10.3333	32.6667	28.3333	1.21973	0.0218021	0.752908	0.19015	-0.413499	0.208855
ENSG00000228462	RPS19P7	ribosomal protein S19 pseudogene 7 [Source:HGNC Symbol;Acc:HGNC:35550]	638	1288	156.667	0.569715	0.00621201	-2.69607	1.53128e-25	-3.24228	2.20809e-173
ENSG00000233158	RPS24P6	ribosomal protein S24 pseudogene 6 [Source:HGNC Symbol;Acc:HGNC:36240]	265	334	1762.67	-0.150342	0.470644	2.00652	6.06027e-21	2.19605	9.49516e-140
ENSG00000198208	RPS6KL1	ribosomal protein S6 kinase like 1 [Source:HGNC Symbol;Acc:HGNC:20222]	13.3333	17.6667	118.667	-0.0764116	0.889781	2.36641	1.45585e-09	2.54264	3.14364e-19
ENSG00000141564	RPTOR	regulatory associated protein of MTOR complex 1 [Source:HGNC Symbol;Acc:HGNC:30287]	40.3333	45	239.667	-0.169146	0.717184	1.95013	2.51468e-06	2.20522	4.14068e-31
ENSG00000124782	RREB1	ras responsive element binding protein 1 [Source:HGNC Symbol;Acc:HGNC:10449]	30.6667	52.3333	270.667	0.22502	0.50818	2.325	2.22884e-17	2.16445	1.58055e-34
ENSG00000052749	RRP12	ribosomal RNA processing 12 homolog [Source:HGNC Symbol;Acc:HGNC:29100]	93.3333	121.667	737	-0.57132	0.139986	1.86845	1.65099e-08	2.39357	2.71496e-82
ENSG00000167524	RSKR	ribosomal protein S6 kinase related [Source:HGNC Symbol;Acc:HGNC:26314]	5.66667	11.3333	247.333	-0.458263	0.588169	4.10003	1.37463e-10	4.24283	1.17498e-48
ENSG00000176225	RTTN	rotatin [Source:HGNC Symbol;Acc:HGNC:18654]	12.3333	23	142.333	0.379521	0.477249	2.73107	1.69891e-11	2.42416	1.10667e-22
ENSG00000145016	RUBCN	rubicon autophagy regulator [Source:HGNC Symbol;Acc:HGNC:28991]	16.6667	18	120.333	-0.455239	0.334725	2.0365	5.44115e-07	2.54749	9.30711e-17
ENSG00000176783	RUFY1	RUN and FYVE domain containing 1 [Source:HGNC Symbol;Acc:HGNC:19760]	31	36.3333	204.667	-0.275433	0.479305	1.94558	9.43937e-10	2.29076	1.46254e-27
ENSG00000105784	RUNDC3B	RUN domain containing 3B [Source:HGNC Symbol;Acc:HGNC:30286]	8.66667	31	5.66667	1.36568	0.0132133	-1.2861	0.108281	-2.65373	9.48701e-08
ENSG00000079102	RUNX1T1	RUNX1 partner transcriptional co-repressor 1 [Source:HGNC Symbol;Acc:HGNC:1535]	4.33333	52.3333	95	3.04451	2.27275e-08	3.6222	5.35061e-12	0.650262	0.00414274
ENSG00000020633	RUNX3	RUNX family transcription factor 3 [Source:HGNC Symbol;Acc:HGNC:10473]	16.6667	6.33333	23.3333	-1.74663	0.0119654	-0.182734	0.740369	1.67178	0.00122301
ENSG00000198853	RUSC2	RUN and SH3 domain containing 2 [Source:HGNC Symbol;Acc:HGNC:23625]	11.6667	14.3333	124.667	-0.112145	0.860879	2.66353	6.43475e-10	2.91697	9.4043e-23
ENSG00000140688	RUSF1	RUS family member 1 [Source:HGNC Symbol;Acc:HGNC:25848]	35.6667	79.6667	96.6667	0.653311	0.0411133	0.667883	0.0355382	0.0754385	0.703491
ENSG00000163191	S100A11	S100 calcium binding protein A11 [Source:HGNC Symbol;Acc:HGNC:10488]	24	80.3333	36.3333	1.24414	0.000446636	-0.127885	0.784084	-1.34485	6.0623e-07
ENSG00000151835	SACS	sacsin molecular chaperone [Source:HGNC Symbol;Acc:HGNC:10519]	26.3333	40.3333	226	0.152699	0.709352	2.33426	1.63553e-13	2.2771	5.23122e-30
ENSG00000160633	SAFB	scaffold attachment factor B [Source:HGNC Symbol;Acc:HGNC:10520]	99.3333	274.333	451.667	0.736354	0.011936	1.25189	5.92385e-07	0.516793	5.10986e-06
ENSG00000161526	SAP30BP	SAP30 binding protein [Source:HGNC Symbol;Acc:HGNC:30785]	121.333	158.667	993	-0.10354	0.685222	2.2858	8.15887e-22	2.43969	1.55899e-101
ENSG00000111961	SASH1	SAM and SH3 domain containing 1 [Source:HGNC Symbol;Acc:HGNC:19182]	19	27	196.333	-0.00966977	0.982534	2.57221	1.18999e-15	2.65858	3.81623e-32
ENSG00000100241	SBF1	SET binding factor 1 [Source:HGNC Symbol;Acc:HGNC:10542]	93	171.667	1666.33	0.525352	0.147181	3.55285	2.61048e-25	3.0805	4.20626e-52
ENSG00000064932	SBNO2	strawberry notch homolog 2 [Source:HGNC Symbol;Acc:HGNC:29158]	18	24.3333	187	-0.014143	0.977345	2.60791	3.47349e-14	2.73463	3.3568e-31
ENSG00000196876	SCN8A	sodium voltage-gated channel alpha subunit 8 [Source:HGNC Symbol;Acc:HGNC:10596]	5.66667	8.66667	82	0.143035	0.859446	3.06341	1.65945e-09	3.03859	1.54518e-16
ENSG00000162572	SCNN1D	sodium channel epithelial 1 subunit delta [Source:HGNC Symbol;Acc:HGNC:10601]	9	15.6667	139.667	0.159699	0.787729	3.10068	6.64555e-14	2.95031	3.19171e-26
ENSG00000180900	SCRIB	scribble planar cell polarity protein [Source:HGNC Symbol;Acc:HGNC:30377]	39.3333	76.3333	401.333	0.454076	0.149911	2.57294	1.3751e-21	2.18889	6.34682e-48
ENSG00000143252	SDHC	succinate dehydrogenase complex subunit C [Source:HGNC Symbol;Acc:HGNC:10682]	136.667	323	53	0.808778	0.00151601	-2.02926	3.41571e-09	-2.81453	6.86576e-62
ENSG00000069188	SDK2	sidekick cell adhesion molecule 2 [Source:HGNC Symbol;Acc:HGNC:19308]	17	35.6667	212	0.408184	0.360195	2.76635	2.56963e-16	2.36789	1.04048e-30
ENSG00000148396	SEC16A	SEC16 homolog A, endoplasmic reticulum export factor [Source:HGNC Symbol;Acc:HGNC:29006]	52.6667	100.333	967	0.319664	0.293841	3.34597	3.45945e-41	3.06501	6.64889e-135
ENSG00000121542	SEC22A	SEC22 homolog A, vesicle trafficking protein [Source:HGNC Symbol;Acc:HGNC:20260]	29.6667	71.6667	46	0.792941	0.0241394	-0.0975421	0.803468	-0.842023	0.000473906
ENSG00000138674	SEC31A	SEC31 homolog A, COPII coat complex component [Source:HGNC Symbol;Acc:HGNC:17052]	105.667	220.667	505.333	0.660878	0.0273149	1.61296	6.24972e-07	0.99074	1.30753e-16
ENSG00000065665	SEC61A2	SEC61 translocon subunit alpha 2 [Source:HGNC Symbol;Acc:HGNC:17702]	32	79	162	0.834841	0.0197034	1.59105	1.89642e-06	0.827788	4.20482e-06
ENSG00000132432	SEC61G	SEC61 translocon subunit gamma [Source:HGNC Symbol;Acc:HGNC:18277]	541.333	1173.33	102.667	0.772626	0.00428463	-2.98069	1.90439e-15	-3.72515	3.77564e-58
ENSG00000143416	SELENBP1	selenium binding protein 1 [Source:HGNC Symbol;Acc:HGNC:10719]	3.66667	22	40.6667	2.08256	0.00248996	2.68363	1.28967e-05	0.685301	0.0391055
ENSG00000113811	SELENOK	selenoprotein K [Source:HGNC Symbol;Acc:HGNC:30394]	213	495.333	148.667	0.716004	0.000781987	-1.25066	2.13217e-06	-1.93985	4.92963e-47
ENSG00000198832	SELENOM	selenoprotein M [Source:HGNC Symbol;Acc:HGNC:30397]	152.333	383	40.3333	0.789789	0.000167448	-2.69908	4.36378e-20	-3.45055	4.89131e-80
ENSG00000250722	SELENOP	selenoprotein P [Source:HGNC Symbol;Acc:HGNC:10751]	12	41.6667	1.66667	1.24245	0.00652431	-3.67329	3.41766e-05	-4.8508	1.79916e-11
ENSG00000131871	SELENOS	selenoprotein S [Source:HGNC Symbol;Acc:HGNC:30396]	183.667	385.667	583.667	0.533519	0.00866454	0.887138	8.84382e-06	0.396306	0.000182498
ENSG00000075223	SEMA3C	semaphorin 3C [Source:HGNC Symbol;Acc:HGNC:10725]	13.6667	37.6667	23.3333	1.02437	0.0516323	0.0973555	0.867874	-0.891998	0.0117842
ENSG00000001617	SEMA3F	semaphorin 3F [Source:HGNC Symbol;Acc:HGNC:10728]	4.66667	5.66667	32.3333	-0.426336	0.607386	1.89897	0.00233893	2.3157	4.90504e-06
ENSG00000143434	SEMA6C	semaphorin 6C [Source:HGNC Symbol;Acc:HGNC:10740]	10	19.3333	265	0.530064	0.37425	3.95557	3.26093e-24	3.57026	7.68314e-52
ENSG00000112701	SENP6	SUMO specific peptidase 6 [Source:HGNC Symbol;Acc:HGNC:20944]	61	71.6667	409.667	-0.286304	0.322884	1.96369	2.58432e-15	2.31351	1.49199e-49
ENSG00000135919	SERPINE2	serpin family E member 2 [Source:HGNC Symbol;Acc:HGNC:8951]	18.3333	59.3333	41	1.13198	0.00392765	0.336242	0.439629	-0.733457	0.00576518
ENSG00000132386	SERPINF1	serpin family F member 1 [Source:HGNC Symbol;Acc:HGNC:8824]	15.6667	134	51.3333	2.5555	6.96361e-12	0.91895	0.0272118	-1.58437	2.82808e-12
ENSG00000130766	SESN2	sestrin 2 [Source:HGNC Symbol;Acc:HGNC:20746]	55.6667	126	306	0.602303	0.0339193	1.6275	6.21364e-11	1.07507	9.16285e-15
ENSG00000099381	SETD1A	SET domain containing 1A, histone lysine methyltransferase [Source:HGNC Symbol;Acc:HGNC:29010]	108.333	115.667	801.667	-0.301454	0.328777	2.22947	5.91317e-14	2.58864	6.61884e-99
ENSG00000139718	SETD1B	SET domain containing 1B, histone lysine methyltransferase [Source:HGNC Symbol;Acc:HGNC:29187]	31.6667	41.3333	332	-0.124131	0.752119	2.60823	7.71697e-17	2.80193	5.44574e-53
ENSG00000181555	SETD2	SET domain containing 2, histone lysine methyltransferase [Source:HGNC Symbol;Acc:HGNC:18420]	39	47.3333	259.667	-0.121643	0.77675	2.0579	1.99862e-08	2.25707	1.30063e-31
ENSG00000168137	SETD5	SET domain containing 5 [Source:HGNC Symbol;Acc:HGNC:25566]	135	197.667	1380	0.115281	0.659557	2.6662	1.4374e-23	2.59682	2.32728e-146
ENSG00000136169	SETDB2	SET domain bifurcated histone lysine methyltransferase 2 [Source:HGNC Symbol;Acc:HGNC:20263]	13.3333	18.3333	129.667	-0.096191	0.848478	2.46618	9.56187e-12	2.62165	6.33442e-22
ENSG00000107290	SETX	senataxin [Source:HGNC Symbol;Acc:HGNC:445]	58.3333	105.333	978.667	0.466154	0.197049	3.41163	1.82809e-24	3.00991	2.62023e-123
ENSG00000115524	SF3B1	splicing factor 3b subunit 1 [Source:HGNC Symbol;Acc:HGNC:10768]	419	548.333	3069.67	-0.11821	0.525485	2.12875	2.29009e-28	2.28057	6.05812e-195
ENSG00000087365	SF3B2	splicing factor 3b subunit 2 [Source:HGNC Symbol;Acc:HGNC:10769]	373.667	481.333	4489.67	0.00936415	0.973861	2.99866	2.17003e-21	3.02245	8.69896e-233
ENSG00000198089	SFI1	SFI1 centrin binding protein [Source:HGNC Symbol;Acc:HGNC:29064]	42	69	463	0.107808	0.743655	2.61243	5.83396e-24	2.54275	2.19713e-63
ENSG00000198879	SFMBT2	Scm like with four mbt domains 2 [Source:HGNC Symbol;Acc:HGNC:20256]	32	36.6667	234.667	-0.228116	0.585515	2.14437	1.05794e-10	2.47287	3.73551e-34
ENSG00000116560	SFPQ	splicing factor proline and glutamine rich [Source:HGNC Symbol;Acc:HGNC:10774]	354.333	595.333	5553.67	0.452558	0.161237	3.42608	5.34247e-21	3.01689	0
ENSG00000061936	SFSWAP	splicing factor SWAP [Source:HGNC Symbol;Acc:HGNC:10790]	103	128.333	1057	-0.0595268	0.857995	2.70942	4.68367e-19	2.83919	1.74434e-123
ENSG00000213064	SFT2D2	SFT2 domain containing 2 [Source:HGNC Symbol;Acc:HGNC:25140]	28.6667	71.3333	14	0.92717	0.0312781	-1.62258	0.00647522	-2.55611	4.03189e-15
ENSG00000164023	SGMS2	sphingomyelin synthase 2 [Source:HGNC Symbol;Acc:HGNC:28395]	10	33	14.3333	1.06947	0.047945	-0.418847	0.492948	-1.41153	0.000223586
ENSG00000027869	SH2D2A	SH2 domain containing 2A [Source:HGNC Symbol;Acc:HGNC:10821]	6.33333	29	10.3333	1.68457	0.00353309	-0.0779499	0.914306	-1.69449	9.77367e-05
ENSG00000142669	SH3BGRL3	SH3 domain binding glutamate rich protein like 3 [Source:HGNC Symbol;Acc:HGNC:15568]	46.6667	125.667	26	0.897327	0.00145177	-1.63315	6.77793e-06	-2.477	2.22405e-24
ENSG00000087266	SH3BP2	SH3 domain binding protein 2 [Source:HGNC Symbol;Acc:HGNC:10825]	35	64	348.333	0.404935	0.271309	2.56925	1.97468e-16	2.24024	1.21497e-43
ENSG00000224660	SH3BP5-AS1	SH3BP5 antisense RNA 1 [Source:HGNC Symbol;Acc:HGNC:44501]	4.33333	6.33333	89.6667	-0.0384887	0.961917	3.54317	4.96362e-12	3.6181	2.42371e-19
ENSG00000175137	SH3BP5L	SH3 binding domain protein 5 like [Source:HGNC Symbol;Acc:HGNC:29360]	16.6667	20	149.333	-0.21319	0.674666	2.39437	3.07766e-10	2.69145	1.3233e-23
ENSG00000214193	SH3D21	SH3 domain containing 21 [Source:HGNC Symbol;Acc:HGNC:26236]	4	6	44.6667	0.175566	0.852171	2.71344	9.29976e-06	2.69003	6.65068e-09
ENSG00000107957	SH3PXD2A	SH3 and PX domains 2A [Source:HGNC Symbol;Acc:HGNC:23664]	59.6667	78.3333	1006	-0.42154	0.260861	3.1107	3.4648e-28	3.48232	2.59882e-141
ENSG00000174705	SH3PXD2B	SH3 and PX domains 2B [Source:HGNC Symbol;Acc:HGNC:29242]	29	38	209.667	-0.0798716	0.840519	2.09075	6.51763e-11	2.25741	3.87335e-29
ENSG00000172985	SH3RF3	SH3 domain containing ring finger 3 [Source:HGNC Symbol;Acc:HGNC:24699]	8.33333	12	86	-0.0862035	0.887354	2.52469	5.87033e-09	2.6405	1.6709e-15
ENSG00000107338	SHB	SH2 domain containing adaptor protein B [Source:HGNC Symbol;Acc:HGNC:10838]	20.3333	28.6667	209.667	-0.0626135	0.885226	2.54597	3.29004e-15	2.66608	1.33219e-34
ENSG00000160691	SHC1	SHC adaptor protein 1 [Source:HGNC Symbol;Acc:HGNC:10840]	28.3333	83.3333	83.6667	1.18267	0.0057187	0.925513	0.0431907	-0.205496	0.32912
ENSG00000180730	SHISA2	shisa family member 2 [Source:HGNC Symbol;Acc:HGNC:20366]	7.33333	63	45.3333	2.59702	1.82513e-07	1.87967	0.000599546	-0.670435	0.0136236
ENSG00000138944	SHISAL1	shisa like 1 [Source:HGNC Symbol;Acc:HGNC:29335]	1.66667	14	27	2.51882	0.00665961	3.1824	0.000141975	0.740674	0.0801887
ENSG00000146414	SHPRH	SNF2 histone linker PHD RING helicase [Source:HGNC Symbol;Acc:HGNC:19336]	20	38	205	0.244011	0.581374	2.48515	2.73122e-14	2.23166	4.14748e-26
ENSG00000164403	SHROOM1	shroom family member 1 [Source:HGNC Symbol;Acc:HGNC:24084]	31.6667	40.6667	305.333	-0.192768	0.616151	2.4444	1.32042e-14	2.69569	6.27614e-43
ENSG00000138771	SHROOM3	shroom family member 3 [Source:HGNC Symbol;Acc:HGNC:30422]	10	13	68.3333	-0.0231492	0.972486	2.02047	2.07437e-05	2.18795	1.23506e-10
ENSG00000127511	SIN3B	SIN3 transcription regulator family member B [Source:HGNC Symbol;Acc:HGNC:19354]	36.3333	56	419.667	0.1001	0.767814	2.72832	5.52536e-26	2.69847	5.97939e-62
ENSG00000213445	SIPA1	signal-induced proliferation-associated 1 [Source:HGNC Symbol;Acc:HGNC:10885]	20.3333	21	133.667	-1.15373	0.0599546	1.39375	0.00741571	2.45998	5.53949e-21
ENSG00000116991	SIPA1L2	signal induced proliferation associated 1 like 2 [Source:HGNC Symbol;Acc:HGNC:23800]	24	49.3333	335	0.558779	0.164192	3.03914	5.85347e-21	2.55925	4.14058e-49
ENSG00000105738	SIPA1L3	signal induced proliferation associated 1 like 3 [Source:HGNC Symbol;Acc:HGNC:23801]	12.3333	20.3333	108.333	0.0474789	0.92748	2.25174	1.3356e-08	2.2107	6.44096e-16
ENSG00000139737	SLAIN1	SLAIN motif family member 1 [Source:HGNC Symbol;Acc:HGNC:26387]	46.3333	112.667	48.3333	0.769877	0.00968608	-0.713369	0.0612149	-1.43279	7.9247e-10
ENSG00000165449	SLC16A9	solute carrier family 16 member 9 [Source:HGNC Symbol;Acc:HGNC:23520]	7	29.3333	17	1.44995	0.0102386	0.375958	0.551392	-0.995493	0.00876838
ENSG00000106688	SLC1A1	solute carrier family 1 member 1 [Source:HGNC Symbol;Acc:HGNC:10939]	2	12	7	1.939	0.0407613	0.871799	0.416207	-0.979856	0.0982069
ENSG00000115902	SLC1A4	solute carrier family 1 member 4 [Source:HGNC Symbol;Acc:HGNC:10942]	41.6667	100.333	62.3333	0.682559	0.0350801	-0.269015	0.399142	-0.894744	3.03195e-05
ENSG00000074621	SLC24A1	solute carrier family 24 member 1 [Source:HGNC Symbol;Acc:HGNC:10975]	7.66667	25.3333	54.6667	1.20066	0.024692	2.02789	2.46416e-05	0.900544	0.00284315
ENSG00000100075	SLC25A1	solute carrier family 25 member 1 [Source:HGNC Symbol;Acc:HGNC:10979]	145.667	317.333	176.667	0.634058	0.00766457	-0.453108	0.0837048	-1.04586	1.03714e-14
ENSG00000147454	SLC25A37	solute carrier family 25 member 37 [Source:HGNC Symbol;Acc:HGNC:29786]	73	98	809.333	-0.0528648	0.868398	2.72082	5.58028e-21	2.83701	8.35573e-110
ENSG00000140284	SLC27A2	solute carrier family 27 member 2 [Source:HGNC Symbol;Acc:HGNC:10996]	6	23.6667	30	1.34893	0.0218674	1.43963	0.0102626	0.138528	0.698047
ENSG00000121073	SLC35B1	solute carrier family 35 member B1 [Source:HGNC Symbol;Acc:HGNC:20798]	321.333	651	152.333	0.67479	0.0173611	-1.65621	1.91259e-06	-2.29989	6.9318e-84
ENSG00000157637	SLC38A10	solute carrier family 38 member 10 [Source:HGNC Symbol;Acc:HGNC:28237]	50.6667	92.6667	469.667	0.204324	0.530316	2.33664	2.88103e-20	2.1395	5.6377e-51
ENSG00000138821	SLC39A8	solute carrier family 39 member 8 [Source:HGNC Symbol;Acc:HGNC:20862]	48	116	27	0.791891	0.00853535	-1.53816	0.000177827	-2.30442	4.74387e-20
ENSG00000167703	SLC43A2	solute carrier family 43 member 2 [Source:HGNC Symbol;Acc:HGNC:23087]	1.66667	10.6667	24	1.95778	0.0411613	2.94928	0.00031626	0.974571	0.0370506
ENSG00000105641	SLC5A5	solute carrier family 5 member 5 [Source:HGNC Symbol;Acc:HGNC:11040]	18.3333	6	1.33333	-2.04902	0.00122779	-4.4517	3.07714e-06	-2.37658	0.0260506
ENSG00000130821	SLC6A8	solute carrier family 6 member 8 [Source:HGNC Symbol;Acc:HGNC:11055]	57.3333	127.333	397	0.635733	0.017937	2.00852	2.01761e-15	1.43354	3.18186e-26
ENSG00000103257	SLC7A5	solute carrier family 7 member 5 [Source:HGNC Symbol;Acc:HGNC:11063]	168.667	414.667	385	0.750395	0.000267419	0.394911	0.0584451	-0.312844	0.00512734
ENSG00000135740	SLC9A5	solute carrier family 9 member A5 [Source:HGNC Symbol;Acc:HGNC:11078]	9.33333	14	202.333	0.0698275	0.905837	3.62867	1.26681e-21	3.64653	3.90357e-40
ENSG00000197818	SLC9A8	solute carrier family 9 member A8 [Source:HGNC Symbol;Acc:HGNC:20728]	15.3333	23.3333	230.333	0.182426	0.739865	3.16278	6.91795e-16	3.09567	1.73547e-39
ENSG00000187122	SLIT1	slit guidance ligand 1 [Source:HGNC Symbol;Acc:HGNC:11085]	3.66667	5	45.3333	-0.423717	0.662081	2.72487	1.07622e-05	2.9828	1.9393e-09
ENSG00000165300	SLITRK5	SLIT and NTRK like family member 5 [Source:HGNC Symbol;Acc:HGNC:20295]	7	86	363	3.07498	7.62556e-11	4.87291	3.40228e-33	1.87319	9.88359e-35
ENSG00000188827	SLX4	SLX4 structure-specific endonuclease subunit [Source:HGNC Symbol;Acc:HGNC:23845]	11.6667	17.6667	418.333	0.199241	0.739906	4.39586	1.71667e-32	4.35815	8.75882e-79
ENSG00000120693	SMAD9	SMAD family member 9 [Source:HGNC Symbol;Acc:HGNC:6774]	17.3333	47.3333	19.6667	0.975077	0.0217652	-0.523775	0.324252	-1.46643	8.75751e-06
ENSG00000127616	SMARCA4	SWI/SNF related, matrix associated, actin dependent regulator of chromatin, subfamily a, member 4 [Source:HGNC Symbol;Acc:HGNC:11100]	424.333	472.333	4220.67	-0.479567	0.0242407	2.46082	8.04655e-48	2.95427	0
ENSG00000138375	SMARCAL1	SWI/SNF related, matrix associated, actin dependent regulator of chromatin, subfamily a like 1 [Source:HGNC Symbol;Acc:HGNC:11102]	49.3333	71.6667	374.667	0.141401	0.705226	2.25081	2.93762e-11	2.18041	4.29647e-45
ENSG00000198887	SMC5	structural maintenance of chromosomes 5 [Source:HGNC Symbol;Acc:HGNC:20465]	44	58.3333	333.667	-0.0305843	0.933173	2.18621	1.39883e-13	2.30951	2.15702e-42
ENSG00000163029	SMC6	structural maintenance of chromosomes 6 [Source:HGNC Symbol;Acc:HGNC:20466]	61.6667	91.6667	480	-0.0350055	0.906173	2.1143	1.04587e-19	2.18512	3.66254e-54
ENSG00000176994	SMCR8	SMCR8-C9orf72 complex subunit [Source:HGNC Symbol;Acc:HGNC:17921]	18.3333	26.3333	277.667	-0.187284	0.693769	3.03534	7.44428e-20	3.19348	3.74013e-49
ENSG00000183172	SMDT1	single-pass membrane protein with aspartate rich tail 1 [Source:HGNC Symbol;Acc:HGNC:25055]	32.6667	87	13.6667	0.974844	0.0111835	-1.89195	0.0005916	-2.87109	1.28873e-19
ENSG00000157106	SMG1	SMG1 nonsense mediated mRNA decay associated PI3K related kinase [Source:HGNC Symbol;Acc:HGNC:30045]	40.3333	51	708	-0.19444	0.552693	3.32837	5.01086e-42	3.59125	3.43655e-118
ENSG00000198952	SMG5	SMG5 nonsense mediated mRNA decay factor [Source:HGNC Symbol;Acc:HGNC:24644]	83.6667	145	1425	0.409407	0.216654	3.43954	2.70995e-28	3.09187	9.82008e-177
ENSG00000152117	SMPD4BP	sphingomyelin phosphodiesterase 4B, pseudogene [Source:HGNC Symbol;Acc:HGNC:24761]	70.3333	85.6667	701.333	-0.857586	0.0689478	2.02688	7.89934e-07	2.82437	9.75482e-94
ENSG00000198742	SMURF1	SMAD specific E3 ubiquitin protein ligase 1 [Source:HGNC Symbol;Acc:HGNC:16807]	21.3333	27	210.667	-0.115084	0.80644	2.56226	1.18725e-11	2.75585	1.2498e-30
ENSG00000186532	SMYD4	SET and MYND domain containing 4 [Source:HGNC Symbol;Acc:HGNC:21067]	22.6667	23.3333	125.333	-0.565306	0.198326	1.61798	2.74567e-06	2.22386	4.42213e-17
ENSG00000065609	SNAP91	synaptosome associated protein 91 [Source:HGNC Symbol;Acc:HGNC:14986]	5	18.3333	21.3333	1.40288	0.0360087	1.33348	0.0408026	0.0110277	0.978063
ENSG00000165684	SNAPC4	small nuclear RNA activating complex polypeptide 4 [Source:HGNC Symbol;Acc:HGNC:11137]	39.3333	65	1067.67	0.175044	0.584577	3.95123	1.22658e-60	3.83221	3.88549e-168
ENSG00000145335	SNCA	synuclein alpha [Source:HGNC Symbol;Acc:HGNC:11138]	29.6667	79.3333	37.3333	0.897128	0.00770295	-0.443986	0.304589	-1.29523	8.00895e-07
ENSG00000101298	SNPH	syntaphilin [Source:HGNC Symbol;Acc:HGNC:15931]	5	9.66667	54	0.5455	0.513912	2.6499	1.10842e-06	2.26961	8.60919e-09
ENSG00000131876	SNRPA1	small nuclear ribonucleoprotein polypeptide A' [Source:HGNC Symbol;Acc:HGNC:11152]	94	239	118	0.852103	0.000476217	-0.39905	0.18441	-1.21638	7.72326e-14
ENSG00000172164	SNTB1	syntrophin beta 1 [Source:HGNC Symbol;Acc:HGNC:11168]	4.33333	19.3333	10.6667	1.63976	0.0252983	0.566714	0.534938	-1.05778	0.0406147
ENSG00000100138	SNU13	small nuclear ribonucleoprotein 13 [Source:HGNC Symbol;Acc:HGNC:7819]	361.333	768.333	137	0.634561	0.00289118	-2.07697	2.6304e-14	-2.68908	4.89945e-107
ENSG00000086300	SNX10	sorting nexin 10 [Source:HGNC Symbol;Acc:HGNC:14974]	8	36.6667	9.66667	1.62746	0.00107776	-0.588181	0.348887	-2.12861	2.14518e-07
ENSG00000143376	SNX27	sorting nexin 27 [Source:HGNC Symbol;Acc:HGNC:20073]	39	92	79.3333	0.780539	0.0430012	0.323994	0.422496	-0.41338	0.0520995
ENSG00000112320	SOBP	sine oculis binding protein homolog [Source:HGNC Symbol;Acc:HGNC:29256]	14	39.6667	95.3333	0.924419	0.0336598	1.92873	3.23484e-07	1.05897	1.25172e-05
ENSG00000149639	SOGA1	suppressor of glucose, autophagy associated 1 [Source:HGNC Symbol;Acc:HGNC:16111]	12.3333	14.3333	161	-0.31611	0.586418	2.89468	1.5797e-15	3.28343	7.83551e-31
ENSG00000125285	SOX21	SRY-box transcription factor 21 [Source:HGNC Symbol;Acc:HGNC:11197]	1	13	26.6667	3.07786	0.00293312	3.82967	3.80046e-05	0.816957	0.0609452
ENSG00000135899	SP110	SP110 nuclear body protein [Source:HGNC Symbol;Acc:HGNC:5401]	3.33333	5	46.6667	0.120599	0.916584	3.00792	1.07224e-05	3.01596	1.92266e-09
ENSG00000076382	SPAG5	sperm associated antigen 5 [Source:HGNC Symbol;Acc:HGNC:13452]	60.6667	87.3333	849.333	-0.0361865	0.905111	2.99837	2.92759e-39	3.07983	1.75393e-109
ENSG00000182957	SPATA13	spermatogenesis associated 13 [Source:HGNC Symbol;Acc:HGNC:23222]	4.66667	6.33333	85	-0.180416	0.826669	3.35299	7.97426e-11	3.54538	5.89916e-18
ENSG00000129128	SPCS3	signal peptidase complex subunit 3 [Source:HGNC Symbol;Acc:HGNC:26212]	221.667	464	30.3333	0.637411	0.00794799	-3.51954	4.65582e-25	-4.13762	5.5399e-105
ENSG00000204710	SPDYC	speedy/RINGO cell cycle regulator family member C [Source:HGNC Symbol;Acc:HGNC:32681]	5.66667	22.3333	3	1.46971	0.0217829	-1.72272	0.0560885	-3.11304	1.43381e-06
ENSG00000152582	SPEF2	sperm flagellar 2 [Source:HGNC Symbol;Acc:HGNC:26293]	4.66667	8	56.3333	0.0901575	0.909288	2.71031	1.96844e-06	2.60694	2.36914e-10
ENSG00000072195	SPEG	striated muscle enriched protein kinase [Source:HGNC Symbol;Acc:HGNC:16901]	15.6667	29.6667	261	0.479627	0.403229	3.31454	1.75999e-16	2.93292	1.26532e-40
ENSG00000065526	SPEN	spen family transcriptional repressor [Source:HGNC Symbol;Acc:HGNC:17575]	67.3333	86.6667	1103.33	-0.223566	0.435246	3.20561	2.57743e-47	3.46704	8.91362e-162
ENSG00000104133	SPG11	SPG11 vesicle trafficking associated, spatacsin [Source:HGNC Symbol;Acc:HGNC:11226]	35.6667	54	317	0.0183386	0.958727	2.32497	6.93042e-17	2.35127	5.82956e-42
ENSG00000197912	SPG7	SPG7 matrix AAA peptidase subunit, paraplegin [Source:HGNC Symbol;Acc:HGNC:11237]	76	100.667	571	-0.15578	0.554424	2.09171	2.29583e-22	2.2995	1.91479e-69
ENSG00000167642	SPINT2	serine peptidase inhibitor, Kunitz type 2 [Source:HGNC Symbol;Acc:HGNC:11247]	10.3333	79.6667	19.6667	2.42305	2.66572e-09	0.147813	0.786317	-2.22436	1.55708e-14
ENSG00000204991	SPIRE2	spire type actin nucleation factor 2 [Source:HGNC Symbol;Acc:HGNC:30623]	20	28.3333	174.667	-0.0424394	0.91877	2.31073	1.9105e-13	2.41795	4.94636e-27
ENSG00000005206	SPPL2B	signal peptide peptidase like 2B [Source:HGNC Symbol;Acc:HGNC:30627]	35.6667	67.6667	350.333	0.535693	0.193792	2.60375	6.31946e-14	2.16376	1.31167e-39
ENSG00000197694	SPTAN1	spectrin alpha, non-erythrocytic 1 [Source:HGNC Symbol;Acc:HGNC:11273]	88	133.667	894	0.196071	0.532701	2.68675	2.75704e-18	2.5416	2.44334e-90
ENSG00000173898	SPTBN2	spectrin beta, non-erythrocytic 2 [Source:HGNC Symbol;Acc:HGNC:11276]	50.6667	67.3333	599.333	-0.146344	0.6409	2.73994	9.03008e-33	2.94587	7.10504e-93
ENSG00000160460	SPTBN4	spectrin beta, non-erythrocytic 4 [Source:HGNC Symbol;Acc:HGNC:14896]	4	10	52.3333	0.9027	0.287828	2.93664	1.46476e-06	2.17502	4.65097e-08
ENSG00000104549	SQLE	squalene epoxidase [Source:HGNC Symbol;Acc:HGNC:11279]	234.667	537	384	0.648289	0.000708022	-0.0818595	0.673323	-0.688634	6.15719e-12
ENSG00000277363	SRCIN1	SRC kinase signaling inhibitor 1 [Source:HGNC Symbol;Acc:HGNC:29506]	4.33333	5	29	-0.148605	0.88493	2.00916	0.0031087	2.33247	1.30974e-05
ENSG00000072310	SREBF1	sterol regulatory element binding transcription factor 1 [Source:HGNC Symbol;Acc:HGNC:11289]	36.6667	87.3333	331.333	0.781324	0.0255884	2.43436	1.34342e-14	1.71899	1.05412e-28
ENSG00000196935	SRGAP1	SLIT-ROBO Rho GTPase activating protein 1 [Source:HGNC Symbol;Acc:HGNC:17382]	6.66667	10.6667	61.3333	-0.230339	0.752891	2.18877	9.71772e-05	2.3171	4.34844e-10
ENSG00000182934	SRPRA	SRP receptor subunit alpha [Source:HGNC Symbol;Acc:HGNC:11307]	52	152.667	206	0.984349	0.00110585	1.17298	8.84589e-06	0.23138	0.185696
ENSG00000167978	SRRM2	serine/arginine repetitive matrix 2 [Source:HGNC Symbol;Acc:HGNC:16639]	508.333	614.333	5036.33	-0.247242	0.176208	2.55273	3.77207e-43	2.83163	1.33418e-303
ENSG00000087087	SRRT	serrate, RNA effector molecule [Source:HGNC Symbol;Acc:HGNC:24101]	98.3333	132.333	830.333	-0.0182459	0.951194	2.36996	1.78505e-17	2.44802	8.72921e-88
ENSG00000084112	SSH1	slingshot protein phosphatase 1 [Source:HGNC Symbol;Acc:HGNC:30579]	20.6667	25.3333	168.667	-0.165369	0.723124	2.2788	1.66556e-10	2.53537	4.09127e-26
ENSG00000123096	SSPN	sarcospan [Source:HGNC Symbol;Acc:HGNC:11322]	1.66667	12	0.333333	2.19189	0.0160243	-3.31028	0.0601367	-5.27675	6.35419e-05
ENSG00000180879	SSR4	signal sequence receptor subunit 4 [Source:HGNC Symbol;Acc:HGNC:11326]	1147	2437.33	149.667	0.531441	0.0012121	-3.71544	6.27764e-74	-4.2286	0
ENSG00000113739	STC2	stanniocalcin 2 [Source:HGNC Symbol;Acc:HGNC:11374]	148.333	361.667	319	0.793135	0.000797858	0.357806	0.150181	-0.388064	0.000435287
ENSG00000164647	STEAP1	STEAP family member 1 [Source:HGNC Symbol;Acc:HGNC:11378]	7.66667	26.3333	20.3333	1.16111	0.0373126	0.546846	0.35813	-0.561383	0.169757
ENSG00000123473	STIL	STIL centriolar assembly protein [Source:HGNC Symbol;Acc:HGNC:10879]	40	56	297.333	-0.0121806	0.971117	2.12333	1.69324e-14	2.20452	4.51292e-38
ENSG00000109689	STIM2	stromal interaction molecule 2 [Source:HGNC Symbol;Acc:HGNC:19205]	26.3333	37	215	-0.04946	0.894508	2.21673	1.04997e-14	2.33275	3.14761e-31
ENSG00000168439	STIP1	stress induced phosphoprotein 1 [Source:HGNC Symbol;Acc:HGNC:11387]	206.667	263	4948.67	-0.110101	0.637024	3.86552	1.07839e-63	4.0251	0
ENSG00000072786	STK10	serine/threonine kinase 10 [Source:HGNC Symbol;Acc:HGNC:11388]	21.6667	36	462.667	0.202834	0.63749	3.60456	2.33015e-37	3.47669	2.4845e-80
ENSG00000163482	STK36	serine/threonine kinase 36 [Source:HGNC Symbol;Acc:HGNC:17209]	23	37	239.333	0.165492	0.677994	2.58569	6.72134e-17	2.48968	1.88187e-35
ENSG00000112079	STK38	serine/threonine kinase 38 [Source:HGNC Symbol;Acc:HGNC:17847]	24	34.3333	192.333	0.00434677	0.99133	2.21226	1.66074e-11	2.27788	8.43141e-26
ENSG00000197457	STMN3	stathmin 3 [Source:HGNC Symbol;Acc:HGNC:15926]	36	80.6667	53.3333	0.693321	0.0407671	-0.160006	0.67736	-0.803295	0.000549631
ENSG00000148175	STOM	stomatin [Source:HGNC Symbol;Acc:HGNC:3383]	42.6667	101.667	6	0.846607	0.0317311	-3.42034	4.6483e-08	-4.28232	1.45032e-25
ENSG00000140022	STON2	stonin 2 [Source:HGNC Symbol;Acc:HGNC:30652]	6.66667	11.3333	60	0.186149	0.789449	2.3435	5.05224e-06	2.20635	2.05727e-09
ENSG00000124222	STX16	syntaxin 16 [Source:HGNC Symbol;Acc:HGNC:11431]	61	113.667	616	0.371208	0.185388	2.5413	2.73544e-27	2.23431	8.20558e-70
ENSG00000164506	STXBP5	syntaxin binding protein 5 [Source:HGNC Symbol;Acc:HGNC:19665]	17.3333	25	196.667	0.0110508	0.980563	2.70318	6.04575e-16	2.76987	1.49979e-32
ENSG00000064607	SUGP2	SURP and G-patch domain containing 2 [Source:HGNC Symbol;Acc:HGNC:18641]	62.6667	93	1581.33	0.0671825	0.81295	3.88131	9.2741e-63	3.88236	1.19566e-238
ENSG00000196562	SULF2	sulfatase 2 [Source:HGNC Symbol;Acc:HGNC:20392]	47	65	434.333	-0.00207574	0.99506	2.45369	1.44265e-16	2.52944	6.2047e-54
ENSG00000092201	SUPT16H	SPT16 homolog, facilitates chromatin remodeling subunit [Source:HGNC Symbol;Acc:HGNC:11465]	405	460.667	2513.33	-0.529978	0.0333698	1.7154	3.03994e-16	2.24058	2.10101e-157
ENSG00000109111	SUPT6H	SPT6 homolog, histone chaperone and transcription elongation factor [Source:HGNC Symbol;Acc:HGNC:11470]	164.333	184.667	1599.67	-0.12822	0.714701	2.73523	3.05162e-13	2.90961	2.44428e-181
ENSG00000148248	SURF4	surfeit 4 [Source:HGNC Symbol;Acc:HGNC:11476]	170.667	383.333	63.6667	0.694619	0.00451776	-2.1218	2.63098e-13	-2.78774	1.11347e-58
ENSG00000197321	SVIL	supervillin [Source:HGNC Symbol;Acc:HGNC:11480]	12.3333	14.6667	93	-0.169129	0.790312	2.169	3.28276e-06	2.45826	1.80755e-15
ENSG00000153157	SYCP2L	synaptonemal complex protein 2 like [Source:HGNC Symbol;Acc:HGNC:21537]	7.66667	9.33333	104.667	-0.539898	0.446201	2.82572	4.57295e-09	3.2772	2.91039e-21
ENSG00000165025	SYK	spleen associated tyrosine kinase [Source:HGNC Symbol;Acc:HGNC:11491]	6.33333	40.6667	112.333	2.07928	0.000377315	3.30909	3.05618e-11	1.26708	5.88478e-08
ENSG00000125755	SYMPK	symplekin [Source:HGNC Symbol;Acc:HGNC:22935]	57	58	435.667	-1.30092	0.0153121	1.50565	0.00154109	2.70366	1.82709e-49
ENSG00000131018	SYNE1	spectrin repeat containing nuclear envelope protein 1 [Source:HGNC Symbol;Acc:HGNC:17089]	4.66667	6.66667	86	-0.0241098	0.976499	3.38298	3.53236e-11	3.47932	2.55389e-18
ENSG00000159082	SYNJ1	synaptojanin 1 [Source:HGNC Symbol;Acc:HGNC:11503]	17.6667	30.6667	177.667	0.288442	0.502586	2.53702	2.06128e-14	2.32931	2.14341e-26
ENSG00000078269	SYNJ2	synaptojanin 2 [Source:HGNC Symbol;Acc:HGNC:11504]	14.3333	38.3333	170.667	1.00486	0.0508279	2.83598	2.68145e-11	1.9447	1.36811e-17
ENSG00000275066	SYNRG	synergin gamma [Source:HGNC Symbol;Acc:HGNC:557]	20.3333	27	156.333	-0.13657	0.746284	2.13034	5.63959e-11	2.32737	1.28075e-22
ENSG00000147041	SYTL5	synaptotagmin like 5 [Source:HGNC Symbol;Acc:HGNC:15589]	12.3333	1	4.33333	-4.24774	3.55853e-05	-2.38544	0.00042157	1.90005	0.131408
ENSG00000198198	SZT2	SZT2 subunit of KICSTOR complex [Source:HGNC Symbol;Acc:HGNC:29040]	23.3333	34.3333	537.667	0.175612	0.729706	3.80574	2.48678e-27	3.76337	3.94564e-96
ENSG00000138162	TACC2	transforming acidic coiled-coil containing protein 2 [Source:HGNC Symbol;Acc:HGNC:11523]	4.66667	13	138	0.929321	0.199111	4.06325	5.37229e-17	3.2045	4.52863e-26
ENSG00000013810	TACC3	transforming acidic coiled-coil containing protein 3 [Source:HGNC Symbol;Acc:HGNC:11524]	73.6667	117	1328	0.130576	0.627573	3.3817	3.39796e-46	3.30525	2.28799e-154
ENSG00000147133	TAF1	TATA-box binding protein associated factor 1 [Source:HGNC Symbol;Acc:HGNC:11535]	23.3333	27.6667	500.667	-0.270136	0.509495	3.62188	2.06364e-37	3.97061	1.81828e-93
ENSG00000103168	TAF1C	TATA-box binding protein associated factor, RNA polymerase I subunit C [Source:HGNC Symbol;Acc:HGNC:11534]	49.3333	80.3333	820.333	0.340353	0.405665	3.40034	8.99669e-21	3.14424	3.24186e-123
ENSG00000115183	TANC1	tetratricopeptide repeat, ankyrin repeat and coiled-coil containing 1 [Source:HGNC Symbol;Acc:HGNC:29364]	19	26	178.333	-0.0234639	0.960696	2.46792	8.15978e-11	2.57493	1.22703e-27
ENSG00000170921	TANC2	tetratricopeptide repeat, ankyrin repeat and coiled-coil containing 2 [Source:HGNC Symbol;Acc:HGNC:30212]	23.6667	31.3333	190.333	0.00465928	0.992308	2.2676	1.55696e-10	2.38915	2.78992e-26
ENSG00000059588	TARBP1	TAR (HIV-1) RNA binding protein 1 [Source:HGNC Symbol;Acc:HGNC:11568]	34.3333	80.6667	1198.67	0.691106	0.0379234	4.31353	1.03113e-57	3.69097	5.93725e-170
ENSG00000108021	TASOR2	transcription activation suppressor family member 2 [Source:HGNC Symbol;Acc:HGNC:23484]	79	123.333	977.333	0.120921	0.654241	2.85043	1.54093e-34	2.78168	8.5157e-110
ENSG00000167202	TBC1D2B	TBC1 domain family member 2B [Source:HGNC Symbol;Acc:HGNC:29183]	17.3333	23	252.667	-0.0546498	0.914885	3.09105	1.78027e-20	3.25504	2.42201e-46
ENSG00000156787	TBC1D31	TBC1 domain family member 31 [Source:HGNC Symbol;Acc:HGNC:30888]	19.6667	32.3333	169.667	0.264426	0.556974	2.35658	6.67769e-11	2.18751	2.89287e-22
ENSG00000146350	TBC1D32	TBC1 domain family member 32 [Source:HGNC Symbol;Acc:HGNC:21485]	20	25	235.333	-0.289292	0.525152	2.71403	2.56969e-17	3.02971	1.46569e-40
ENSG00000136111	TBC1D4	TBC1 domain family member 4 [Source:HGNC Symbol;Acc:HGNC:19165]	86	190.667	1036.67	0.61547	0.01424	2.79733	2.22926e-34	2.2392	7.00574e-93
ENSG00000204634	TBC1D8	TBC1 domain family member 8 [Source:HGNC Symbol;Acc:HGNC:17791]	6.66667	8	80.3333	-0.188624	0.816594	2.82334	5.96448e-08	3.13449	1.91466e-15
ENSG00000109436	TBC1D9	TBC1 domain family member 9 [Source:HGNC Symbol;Acc:HGNC:21710]	26	38.3333	293.667	0.0818766	0.835529	2.7274	1.30538e-18	2.73031	6.47111e-47
ENSG00000197226	TBC1D9B	TBC1 domain family member 9B [Source:HGNC Symbol;Acc:HGNC:29097]	35.3333	50.3333	507.333	0.0541759	0.886345	3.09826	1.28023e-24	3.13033	7.74539e-83
ENSG00000105254	TBCB	tubulin folding cofactor B [Source:HGNC Symbol;Acc:HGNC:1989]	90	214.667	92.6667	0.903947	0.010135	-0.526754	0.215628	-1.40938	5.27078e-16
ENSG00000198933	TBKBP1	TBK1 binding protein 1 [Source:HGNC Symbol;Acc:HGNC:30140]	37.6667	48	394.333	-0.169155	0.631449	2.59998	1.68012e-20	2.83178	1.52749e-61
ENSG00000112837	TBX18	T-box transcription factor 18 [Source:HGNC Symbol;Acc:HGNC:11595]	15	47.3333	32.6667	1.15957	0.00613566	0.382233	0.43139	-0.731767	0.0143621
ENSG00000121068	TBX2	T-box transcription factor 2 [Source:HGNC Symbol;Acc:HGNC:11597]	26	33.3333	200.333	-0.264855	0.511549	2.07723	2.33939e-10	2.37797	4.57795e-28
ENSG00000113649	TCERG1	transcription elongation regulator 1 [Source:HGNC Symbol;Acc:HGNC:15630]	184.667	226.333	1796.33	-0.235256	0.281372	2.50499	9.33308e-35	2.78348	1.28052e-184
ENSG00000100207	TCF20	transcription factor 20 [Source:HGNC Symbol;Acc:HGNC:11631]	6	9.66667	67	0.148253	0.830631	2.65863	3.36927e-08	2.58594	2.18972e-12
ENSG00000261787	TCF24	transcription factor 24 [Source:HGNC Symbol;Acc:HGNC:32275]	5	18.3333	5	1.38174	0.0419649	-0.704635	0.443426	-2.07335	0.000319575
ENSG00000205356	TECPR1	tectonin beta-propeller repeat containing 1 [Source:HGNC Symbol;Acc:HGNC:22214]	16.3333	23	167.667	-0.158109	0.739525	2.48888	4.7343e-13	2.65965	1.43464e-28
ENSG00000196663	TECPR2	tectonin beta-propeller repeat containing 2 [Source:HGNC Symbol;Acc:HGNC:19957]	17.6667	19	170	-0.460745	0.319969	2.44777	1.64512e-13	2.96119	4.06562e-30
ENSG00000129566	TEP1	telomerase associated protein 1 [Source:HGNC Symbol;Acc:HGNC:11726]	5	7.33333	74.6667	0.13584	0.881981	3.11119	3.31433e-09	3.14566	6.37062e-15
ENSG00000164362	TERT	telomerase reverse transcriptase [Source:HGNC Symbol;Acc:HGNC:11730]	10.3333	16.3333	269.333	0.137699	0.81367	3.90088	2.5446e-24	3.83534	3.34001e-48
ENSG00000187605	TET3	tet methylcytosine dioxygenase 3 [Source:HGNC Symbol;Acc:HGNC:28313]	26	26.3333	144	-1.26761	0.0342919	1.06588	0.0399528	2.24617	2.24161e-20
ENSG00000182459	TEX19	testis expressed 19 [Source:HGNC Symbol;Acc:HGNC:33802]	33	15.3333	10.3333	-1.6195	0.000582851	-2.45189	1.16384e-06	-0.779423	0.141224
ENSG00000003436	TFPI	tissue factor pathway inhibitor [Source:HGNC Symbol;Acc:HGNC:11760]	6.66667	22.6667	7.33333	1.29843	0.0343534	-0.51682	0.54798	-1.82301	0.000375376
ENSG00000135966	TGFBRAP1	transforming growth factor beta receptor associated protein 1 [Source:HGNC Symbol;Acc:HGNC:16836]	24.3333	40.6667	208	0.156946	0.682355	2.25391	8.01721e-14	2.14759	1.78228e-27
ENSG00000115970	THADA	THADA armadillo repeat containing [Source:HGNC Symbol;Acc:HGNC:19217]	71.6667	93	657.333	0.00581122	0.987241	2.56774	5.08837e-13	2.61344	8.65871e-74
ENSG00000125676	THOC2	THO complex 2 [Source:HGNC Symbol;Acc:HGNC:19073]	484.333	550.667	3734.67	-0.616675	0.0282773	1.95932	7.46796e-17	2.55571	7.06112e-266
ENSG00000136114	THSD1	thrombospondin type 1 domain containing 1 [Source:HGNC Symbol;Acc:HGNC:17754]	4	6.66667	45.6667	0.280095	0.753983	2.7366	4.99914e-06	2.57695	8.19957e-09
ENSG00000156299	TIAM1	TIAM Rac1 associated GEF 1 [Source:HGNC Symbol;Acc:HGNC:11805]	38.3333	41.6667	270.333	-0.358297	0.347874	2.06836	3.84306e-12	2.49829	3.3253e-37
ENSG00000140534	TICRR	TOPBP1 interacting checkpoint and replication regulator [Source:HGNC Symbol;Acc:HGNC:28704]	47	58.6667	647	-0.165841	0.63648	3.02618	1.27797e-24	3.26036	2.67863e-102
ENSG00000134375	TIMM17A	translocase of inner mitochondrial membrane 17A [Source:HGNC Symbol;Acc:HGNC:17315]	157	348.333	152	0.62376	0.00533884	-0.820383	0.000703798	-1.40066	2.38975e-26
ENSG00000163659	TIPARP	TCDD inducible poly(ADP-ribose) polymerase [Source:HGNC Symbol;Acc:HGNC:23696]	13	45	105.667	1.24134	0.00436816	2.1983	9.4802e-09	1.02467	3.63532e-06
ENSG00000166548	TK2	thymidine kinase 2 [Source:HGNC Symbol;Acc:HGNC:11831]	11.3333	17.3333	145.333	-0.0676686	0.900837	2.79621	2.13732e-12	2.86105	7.19572e-26
ENSG00000171914	TLN2	talin 2 [Source:HGNC Symbol;Acc:HGNC:15447]	14.3333	15.6667	102	-0.786527	0.207139	1.77049	0.000406277	2.49089	2.09329e-15
ENSG00000064115	TM7SF3	transmembrane 7 superfamily member 3 [Source:HGNC Symbol;Acc:HGNC:23049]	92.3333	207.667	84.6667	0.653631	0.0059167	-0.895127	0.000889262	-1.49966	3.68e-20
ENSG00000143183	TMCO1	transmembrane and coiled-coil domains 1 [Source:HGNC Symbol;Acc:HGNC:18188]	192.667	413.333	79.6667	0.637052	0.0053538	-1.97116	4.85613e-12	-2.57979	5.24928e-68
ENSG00000121210	TMEM131L	transmembrane 131 like [Source:HGNC Symbol;Acc:HGNC:29146]	19.6667	32.3333	226	0.176983	0.682339	2.70626	1.01979e-15	2.60194	3.72165e-33
ENSG00000181291	TMEM132E	transmembrane protein 132E [Source:HGNC Symbol;Acc:HGNC:26991]	6.33333	21.3333	138.667	1.03584	0.114543	3.55995	6.76395e-13	2.49702	6.57304e-22
ENSG00000164124	TMEM144	transmembrane protein 144 [Source:HGNC Symbol;Acc:HGNC:25633]	8.33333	25.6667	3	1.1851	0.0554058	-2.10247	0.0527728	-3.31356	1.88118e-07
ENSG00000137210	TMEM14B	transmembrane protein 14B [Source:HGNC Symbol;Acc:HGNC:21384]	121	250	29.6667	0.567366	0.0235813	-2.74118	6.18761e-16	-3.27905	7.61992e-56
ENSG00000273238	TMEM271	transmembrane protein 271 [Source:HGNC Symbol;Acc:HGNC:53639]	2	11.3333	8	1.95863	0.0345766	1.21403	0.211493	-0.704064	0.23652
ENSG00000121900	TMEM54	transmembrane protein 54 [Source:HGNC Symbol;Acc:HGNC:24143]	24	70.3333	23.3333	1.03378	0.00589732	-0.807563	0.0724138	-1.79364	5.81445e-10
ENSG00000136842	TMOD1	tropomodulin 1 [Source:HGNC Symbol;Acc:HGNC:11871]	11.6667	32.3333	78.6667	0.96554	0.0398324	1.96628	2.13351e-06	1.07962	3.48239e-05
ENSG00000205542	TMSB4X	thymosin beta 4 X-linked [Source:HGNC Symbol;Acc:HGNC:11881]	70	152.333	13.3333	0.59687	0.0250344	-3.16138	2.01447e-15	-3.71652	2.18889e-38
ENSG00000223551	TMSB4XP4	TMSB4X pseudogene 4 [Source:HGNC Symbol;Acc:HGNC:11886]	3.66667	16.6667	3.66667	1.69462	0.023035	-0.691816	0.507702	-2.38313	0.000210093
ENSG00000215788	TNFRSF25	TNF receptor superfamily member 25 [Source:HGNC Symbol;Acc:HGNC:11910]	4	5.33333	91	-0.222404	0.801933	3.66304	1.04057e-11	3.88757	8.40998e-20
ENSG00000061938	TNK2	tyrosine kinase non receptor 2 [Source:HGNC Symbol;Acc:HGNC:19297]	24.6667	32.3333	232.667	-0.066368	0.888312	2.49017	1.05503e-12	2.64711	7.69003e-36
ENSG00000105576	TNPO2	transportin 2 [Source:HGNC Symbol;Acc:HGNC:19998]	91.6667	119.333	886.333	-0.232338	0.377785	2.42421	1.63531e-28	2.68819	5.0976e-107
ENSG00000182095	TNRC18	trinucleotide repeat containing 18 [Source:HGNC Symbol;Acc:HGNC:11962]	37	39.6667	404.667	-0.494174	0.167206	2.61212	1.83976e-22	3.14764	9.23625e-67
ENSG00000090905	TNRC6A	trinucleotide repeat containing adaptor 6A [Source:HGNC Symbol;Acc:HGNC:11969]	38.6667	58.3333	621.333	0.0690157	0.841795	3.21411	4.22553e-35	3.20756	6.52177e-95
ENSG00000078687	TNRC6C	trinucleotide repeat containing adaptor 6C [Source:HGNC Symbol;Acc:HGNC:29318]	47.3333	50.3333	374.667	-0.458589	0.158857	2.17311	1.58211e-17	2.68941	3.24484e-58
ENSG00000198718	TOGARAM1	TOG array regulator of axonemal microtubules 1 [Source:HGNC Symbol;Acc:HGNC:19959]	11	17.3333	151.333	0.149176	0.792885	2.99037	6.21351e-15	2.92229	3.54126e-27
ENSG00000175662	TOM1L2	target of myb1 like 2 membrane trafficking protein [Source:HGNC Symbol;Acc:HGNC:11984]	28	45	269.667	0.175877	0.635027	2.48133	9.52555e-18	2.37848	4.56693e-38
ENSG00000160949	TONSL	tonsoku like, DNA repair protein [Source:HGNC Symbol;Acc:HGNC:7801]	21.3333	23.6667	264.667	-0.385659	0.376414	2.82086	1.90844e-20	3.27651	5.59507e-48
ENSG00000177302	TOP3A	DNA topoisomerase III alpha [Source:HGNC Symbol;Acc:HGNC:11992]	24.3333	39.3333	251.667	0.173238	0.647386	2.57213	6.65249e-18	2.47257	4.86004e-37
ENSG00000100038	TOP3B	DNA topoisomerase III beta [Source:HGNC Symbol;Acc:HGNC:11993]	33.6667	40	380.333	-0.214468	0.600302	2.7513	5.19054e-17	3.04699	3.90687e-63
ENSG00000228050	TOP3BP1	DNA topoisomerase III beta pseudogene 1 [Source:HGNC Symbol;Acc:HGNC:11994]	21.6667	35	299.333	0.236045	0.588125	3.02919	1.3285e-20	2.89224	4.54611e-51
ENSG00000163781	TOPBP1	DNA topoisomerase II binding protein 1 [Source:HGNC Symbol;Acc:HGNC:17008]	98	129	702	-0.106	0.684655	2.07888	4.18046e-19	2.23871	2.01179e-71
ENSG00000067369	TP53BP1	tumor protein p53 binding protein 1 [Source:HGNC Symbol;Acc:HGNC:11999]	44.6667	60.6667	377.333	-0.0913985	0.777592	2.28484	1.16184e-18	2.43351	1.14189e-48
ENSG00000111907	TPD52L1	TPD52 like 1 [Source:HGNC Symbol;Acc:HGNC:12006]	15.3333	51.3333	85.6667	1.18329	0.0036021	1.65626	8.57804e-06	0.532927	0.0214956
ENSG00000047410	TPR	translocated promoter region, nuclear basket protein [Source:HGNC Symbol;Acc:HGNC:12017]	252.333	402.333	2123.67	0.327273	0.27781	2.49038	1.22661e-13	2.19844	1.21776e-135
ENSG00000088325	TPX2	TPX2 microtubule nucleation factor [Source:HGNC Symbol;Acc:HGNC:1249]	186.667	261	2042	-0.267859	0.34528	2.51226	4.02547e-27	2.76441	1.44389e-187
ENSG00000160218	TRAPPC10	trafficking protein particle complex 10 [Source:HGNC Symbol;Acc:HGNC:11868]	36.6667	41	245.667	-0.438683	0.229801	1.91168	4.90978e-13	2.38094	3.23867e-33
ENSG00000168538	TRAPPC11	trafficking protein particle complex 11 [Source:HGNC Symbol;Acc:HGNC:25751]	35.6667	49.3333	293.667	-0.0842078	0.800443	2.22061	1.6147e-16	2.36535	3.98271e-40
ENSG00000153339	TRAPPC8	trafficking protein particle complex 8 [Source:HGNC Symbol;Acc:HGNC:29169]	49	78.3333	411	0.116194	0.720122	2.25615	9.74413e-15	2.19065	2.36078e-43
ENSG00000101255	TRIB3	tribbles pseudokinase 3 [Source:HGNC Symbol;Acc:HGNC:16228]	129.333	330.333	188	1.0094	0.00156055	-0.0371899	0.920616	-1.01622	1.18869e-15
ENSG00000110171	TRIM3	tripartite motif containing 3 [Source:HGNC Symbol;Acc:HGNC:10064]	6	6.66667	53.6667	-0.292837	0.74884	2.39911	2.82664e-05	2.81547	6.88435e-10
ENSG00000134253	TRIM45	tripartite motif containing 45 [Source:HGNC Symbol;Acc:HGNC:19018]	10.6667	17.6667	101.667	0.0176263	0.974814	2.35132	2.23897e-08	2.32099	5.75805e-16
ENSG00000183718	TRIM52	tripartite motif containing 52 [Source:HGNC Symbol;Acc:HGNC:19024]	10.6667	12	193.333	-0.335918	0.566546	3.37776	3.28966e-19	3.80178	2.28475e-38
ENSG00000116525	TRIM62	tripartite motif containing 62 [Source:HGNC Symbol;Acc:HGNC:25574]	7.66667	10.6667	69.6667	0.0692448	0.927303	2.43244	1.57895e-06	2.50441	2.39081e-11
ENSG00000166436	TRIM66	tripartite motif containing 66 [Source:HGNC Symbol;Acc:HGNC:29005]	7	8	160	-0.363352	0.615067	3.69613	1.66149e-18	4.11538	2.03261e-32
ENSG00000100505	TRIM9	tripartite motif containing 9 [Source:HGNC Symbol;Acc:HGNC:16288]	4.66667	24	21.3333	1.895	0.00484631	1.46901	0.0367956	-0.369128	0.340052
ENSG00000038382	TRIO	trio Rho guanine nucleotide exchange factor [Source:HGNC Symbol;Acc:HGNC:12303]	54	55.3333	626.333	-0.401723	0.25455	2.81292	9.99267e-22	3.29329	7.22734e-102
ENSG00000155275	TRMT44	tRNA methyltransferase 44 homolog [Source:HGNC Symbol;Acc:HGNC:26653]	14.3333	19.6667	199.667	-0.259882	0.621381	2.90785	1.03558e-14	3.14234	1.21563e-34
ENSG00000067445	TRO	trophinin [Source:HGNC Symbol;Acc:HGNC:12326]	41.3333	54.6667	746.333	0.0264942	0.948652	3.4943	1.56e-25	3.56642	1.28889e-128
ENSG00000138741	TRPC3	transient receptor potential cation channel subfamily C member 3 [Source:HGNC Symbol;Acc:HGNC:12335]	3.33333	5	29.3333	-0.198291	0.830163	2.20053	0.00142169	2.34796	9.08772e-06
ENSG00000092439	TRPM7	transient receptor potential cation channel subfamily M member 7 [Source:HGNC Symbol;Acc:HGNC:17994]	54	66.6667	559.667	-0.265453	0.379109	2.54428	4.20548e-27	2.86255	1.60157e-82
ENSG00000196689	TRPV1	transient receptor potential cation channel subfamily V member 1 [Source:HGNC Symbol;Acc:HGNC:12716]	7.66667	9	76	-0.15975	0.849974	2.542	2.0955e-07	2.87455	1.45837e-13
ENSG00000196367	TRRAP	transformation/transcription domain associated protein [Source:HGNC Symbol;Acc:HGNC:12347]	53.3333	62.6667	693.333	-0.307384	0.3284	2.90226	2.14248e-33	3.2655	1.26746e-109
ENSG00000165699	TSC1	TSC complex subunit 1 [Source:HGNC Symbol;Acc:HGNC:12362]	45.3333	79	517.667	0.242197	0.420868	2.69336	1.64539e-26	2.50507	2.60067e-66
ENSG00000103197	TSC2	TSC complex subunit 2 [Source:HGNC Symbol;Acc:HGNC:12363]	90.6667	124	675	-0.140136	0.589662	2.06652	6.95279e-23	2.24264	5.26249e-69
ENSG00000196428	TSC22D2	TSC22 domain family member 2 [Source:HGNC Symbol;Acc:HGNC:29095]	52.6667	115.667	473.667	0.625039	0.0372872	2.3842	2.26346e-20	1.82744	1.10754e-42
ENSG00000157514	TSC22D3	TSC22 domain family member 3 [Source:HGNC Symbol;Acc:HGNC:3051]	174	410.667	303	0.767626	0.000572647	0.0856443	0.729328	-0.643521	9.74976e-09
ENSG00000198860	TSEN15	tRNA splicing endonuclease subunit 15 [Source:HGNC Symbol;Acc:HGNC:16791]	77	190.667	36	0.844121	0.00247301	-1.79132	5.47895e-07	-2.60716	1.72058e-36
ENSG00000179981	TSHZ1	teashirt zinc finger homeobox 1 [Source:HGNC Symbol;Acc:HGNC:10669]	29.3333	41.3333	207.667	0.0215599	0.955597	2.06427	4.7454e-11	2.12485	3.5775e-27
ENSG00000182463	TSHZ2	teashirt zinc finger homeobox 2 [Source:HGNC Symbol;Acc:HGNC:13010]	5	6	46	-0.421735	0.591611	2.31381	3.59094e-05	2.72712	2.96384e-09
ENSG00000106537	TSPAN13	tetraspanin 13 [Source:HGNC Symbol;Acc:HGNC:21643]	39.6667	87.6667	14.6667	0.619628	0.0477209	-2.20859	1.45475e-07	-2.78144	4.31593e-19
ENSG00000100300	TSPO	translocator protein [Source:HGNC Symbol;Acc:HGNC:1158]	296.667	630.667	117.333	0.529647	0.00433345	-2.136	7.27834e-22	-2.63156	4.46957e-96
ENSG00000184205	TSPYL2	TSPY like 2 [Source:HGNC Symbol;Acc:HGNC:24358]	8	23	210.667	0.993652	0.0636265	3.91086	2.93706e-22	2.99419	1.74287e-36
ENSG00000167721	TSR1	TSR1 ribosome maturation factor [Source:HGNC Symbol;Acc:HGNC:25542]	109	152	786	0.0822741	0.784161	2.19238	2.80527e-13	2.16284	6.8448e-79
ENSG00000149292	TTC12	tetratricopeptide repeat domain 12 [Source:HGNC Symbol;Acc:HGNC:23700]	37	46.3333	269	-0.21305	0.534538	2.05899	2.91083e-14	2.33314	8.53797e-37
ENSG00000143643	TTC13	tetratricopeptide repeat domain 13 [Source:HGNC Symbol;Acc:HGNC:26204]	28	43	281	0.0829768	0.819219	2.52045	1.82751e-18	2.50474	2.50513e-40
ENSG00000123607	TTC21B	tetratricopeptide repeat domain 21B [Source:HGNC Symbol;Acc:HGNC:25660]	25.3333	33.6667	248.333	-0.106522	0.788876	2.50139	2.27152e-17	2.67952	1.50957e-39
ENSG00000100154	TTC28	tetratricopeptide repeat domain 28 [Source:HGNC Symbol;Acc:HGNC:29179]	47.3333	67	503.333	0.00516048	0.986931	2.63607	1.11742e-24	2.70609	8.61166e-73
ENSG00000196659	TTC30B	tetratricopeptide repeat domain 30B [Source:HGNC Symbol;Acc:HGNC:26425]	3.66667	14.3333	22.6667	1.47087	0.0570818	1.86156	0.00706059	0.465975	0.283972
ENSG00000085831	TTC39A	tetratricopeptide repeat domain 39A [Source:HGNC Symbol;Acc:HGNC:18657]	14.3333	41.3333	75	0.956724	0.0246409	1.54841	6.62465e-05	0.651014	0.0100162
ENSG00000068724	TTC7A	tetratricopeptide repeat domain 7A [Source:HGNC Symbol;Acc:HGNC:19750]	11.6667	15.6667	100.333	-0.118269	0.835503	2.28022	7.34077e-09	2.46959	7.35859e-16
ENSG00000101407	TTI1	TELO2 interacting protein 1 [Source:HGNC Symbol;Acc:HGNC:29029]	40	50.6667	318	-0.194187	0.549659	2.18427	2.67122e-17	2.44303	6.9452e-46
ENSG00000214021	TTLL3	tubulin tyrosine ligase like 3 [Source:HGNC Symbol;Acc:HGNC:24483]	7.66667	9.33333	328.667	-0.710672	0.338788	4.42301	3.90745e-20	4.93219	2.09898e-59
ENSG00000130640	TUBGCP2	tubulin gamma complex associated protein 2 [Source:HGNC Symbol;Acc:HGNC:18599]	248	296.333	1744	-0.225895	0.309052	2.08583	8.62473e-19	2.34803	3.06064e-120
ENSG00000128159	TUBGCP6	tubulin gamma complex associated protein 6 [Source:HGNC Symbol;Acc:HGNC:18127]	53.6667	63	1086	-0.53571	0.142229	3.38808	5.60352e-33	3.90201	6.24294e-170
ENSG00000130338	TULP4	TUB like protein 4 [Source:HGNC Symbol;Acc:HGNC:15530]	21.3333	22.3333	185	-0.345587	0.518215	2.35923	3.5541e-11	2.83727	2.88715e-29
ENSG00000134744	TUT4	terminal uridylyl transferase 4 [Source:HGNC Symbol;Acc:HGNC:28981]	48.6667	71	401.333	-0.0194544	0.950095	2.23068	5.46225e-20	2.29584	2.34752e-47
ENSG00000083223	TUT7	terminal uridylyl transferase 7 [Source:HGNC Symbol;Acc:HGNC:25817]	15	25	184	0.310571	0.563859	2.8679	1.45278e-13	2.67655	5.32697e-31
ENSG00000122691	TWIST1	twist family bHLH transcription factor 1 [Source:HGNC Symbol;Acc:HGNC:12428]	11.6667	55.6667	24.6667	1.60157	0.000536445	0.131158	0.814916	-1.37471	1.35163e-05
ENSG00000084652	TXLNA	taxilin alpha [Source:HGNC Symbol;Acc:HGNC:30685]	184.333	243.333	1342	-0.303036	0.249667	1.95357	1.70408e-19	2.25758	1.68584e-113
ENSG00000136810	TXN	thioredoxin [Source:HGNC Symbol;Acc:HGNC:12435]	906.667	1879.33	170	0.630357	0.00423342	-3.06368	1.39719e-28	-3.66906	2.29418e-235
ENSG00000129235	TXNDC17	thioredoxin domain containing 17 [Source:HGNC Symbol;Acc:HGNC:28218]	140.333	288.333	75.6667	0.496533	0.0193017	-1.68412	6.33087e-12	-2.13526	2.71137e-42
ENSG00000232823	TXNP1	thioredoxin pseudogene 1 [Source:HGNC Symbol;Acc:HGNC:49481]	27	68	4	0.942427	0.0302699	-3.31038	8.30064e-06	-4.28871	1.5279e-18
ENSG00000105397	TYK2	tyrosine kinase 2 [Source:HGNC Symbol;Acc:HGNC:12440]	52.3333	70.6667	721	0.000203463	0.999539	3.06805	5.68234e-26	3.1458	2.5492e-110
ENSG00000162623	TYW3	tRNA-yW synthesizing protein 3 homolog [Source:HGNC Symbol;Acc:HGNC:24757]	41	104.667	47	0.866248	0.00849074	-0.487183	0.284459	-1.34541	2.59066e-07
ENSG00000197355	UAP1L1	UDP-N-acetylglucosamine pyrophosphorylase 1 like 1 [Source:HGNC Symbol;Acc:HGNC:28082]	30.3333	58.6667	315	0.350135	0.34143	2.53251	4.8742e-19	2.21779	2.50556e-39
ENSG00000126261	UBA2	ubiquitin like modifier activating enzyme 2 [Source:HGNC Symbol;Acc:HGNC:30661]	116.333	332.333	199.333	1.08583	0.000111663	0.113078	0.721974	-0.940118	1.06404e-12
ENSG00000175063	UBE2C	ubiquitin conjugating enzyme E2 C [Source:HGNC Symbol;Acc:HGNC:15937]	129	260	63.3333	0.486084	0.028996	-1.79281	3.21192e-11	-2.23872	3.21404e-39
ENSG00000175931	UBE2O	ubiquitin conjugating enzyme E2 O [Source:HGNC Symbol;Acc:HGNC:29554]	123.333	143.667	1133	-0.274245	0.262279	2.44512	2.13977e-28	2.77479	6.00878e-141
ENSG00000151148	UBE3B	ubiquitin protein ligase E3B [Source:HGNC Symbol;Acc:HGNC:13478]	42.3333	56.6667	340.667	-0.0146218	0.968277	2.2832	2.59024e-13	2.38149	1.20123e-47
ENSG00000118900	UBN1	ubinuclein 1 [Source:HGNC Symbol;Acc:HGNC:12506]	72.3333	83.3333	793.667	-0.323184	0.239189	2.66398	7.23906e-32	3.04544	1.1131e-117
ENSG00000157741	UBN2	ubinuclein 2 [Source:HGNC Symbol;Acc:HGNC:21931]	28	46	385	0.25406	0.573239	3.01027	1.00795e-22	2.86375	1.05022e-52
ENSG00000159459	UBR1	ubiquitin protein ligase E3 component n-recognin 1 [Source:HGNC Symbol;Acc:HGNC:16808]	21	30.3333	191	0.0475195	0.913324	2.41254	4.16052e-12	2.44657	1.26788e-28
ENSG00000104517	UBR5	ubiquitin protein ligase E3 component n-recognin 5 [Source:HGNC Symbol;Acc:HGNC:16806]	79.6667	102	1004.67	-0.09429	0.762722	2.94207	4.452e-28	3.09783	6.37068e-131
ENSG00000108312	UBTF	upstream binding transcription factor [Source:HGNC Symbol;Acc:HGNC:12511]	188	276.333	4532.67	0.114673	0.658826	3.89276	1.07953e-57	3.82861	0
ENSG00000147854	UHRF2	ubiquitin like with PHD and ring finger domains 2 [Source:HGNC Symbol;Acc:HGNC:12557]	39	53	483	0.0481036	0.907263	2.94106	1.46062e-17	2.98022	4.45539e-72
ENSG00000177169	ULK1	unc-51 like autophagy activating kinase 1 [Source:HGNC Symbol;Acc:HGNC:12558]	22.3333	31	215	-0.181336	0.682715	2.39699	1.6168e-13	2.59272	9.1365e-32
ENSG00000083290	ULK2	unc-51 like autophagy activating kinase 2 [Source:HGNC Symbol;Acc:HGNC:13480]	11	24.6667	154.333	0.781385	0.192572	3.07772	2.83859e-12	2.43893	2.59546e-24
ENSG00000005007	UPF1	UPF1 RNA helicase and ATPase [Source:HGNC Symbol;Acc:HGNC:9962]	101	134	738.667	-0.11556	0.667944	2.08163	1.97743e-21	2.25862	4.674e-72
ENSG00000151461	UPF2	UPF2 regulator of nonsense mediated mRNA decay [Source:HGNC Symbol;Acc:HGNC:17854]	79.3333	87.6667	455.667	-0.528631	0.100251	1.62235	2.34511e-10	2.16691	1.44856e-48
ENSG00000142207	URB1	URB1 ribosome biogenesis homolog [Source:HGNC Symbol;Acc:HGNC:17344]	60.6667	75.6667	572.333	-0.338765	0.295362	2.36425	1.20806e-20	2.71528	4.36669e-83
ENSG00000135763	URB2	URB2 ribosome biogenesis homolog [Source:HGNC Symbol;Acc:HGNC:28967]	37	58.3333	336.667	0.106914	0.757146	2.37915	1.84755e-18	2.32609	2.3617e-42
ENSG00000106608	URGCP	upregulator of cell proliferation [Source:HGNC Symbol;Acc:HGNC:30890]	17	28.6667	321.333	0.21116	0.633376	3.41593	1.67537e-25	3.2748	6.51458e-54
ENSG00000105176	URI1	URI1 prefoldin like chaperone [Source:HGNC Symbol;Acc:HGNC:13236]	153.667	199	1424.33	-0.30846	0.236875	2.32352	6.12342e-29	2.63633	2.00037e-146
ENSG00000102226	USP11	ubiquitin specific peptidase 11 [Source:HGNC Symbol;Acc:HGNC:12609]	114.667	124.333	622.667	-0.315882	0.288409	1.76078	5.95484e-10	2.12189	5.50235e-57
ENSG00000136878	USP20	ubiquitin specific peptidase 20 [Source:HGNC Symbol;Acc:HGNC:12619]	17.3333	32.6667	187.333	0.500459	0.338551	2.70637	2.55528e-11	2.31622	4.99745e-25
ENSG00000162402	USP24	ubiquitin specific peptidase 24 [Source:HGNC Symbol;Acc:HGNC:12623]	73	87.3333	673.667	-0.0430439	0.920503	2.63603	1.85244e-10	2.74351	1.23301e-94
ENSG00000115464	USP34	ubiquitin specific peptidase 34 [Source:HGNC Symbol;Acc:HGNC:20066]	57.3333	76.6667	498	-0.13476	0.638187	2.30736	5.87882e-23	2.49408	8.07027e-65
ENSG00000170185	USP38	ubiquitin specific peptidase 38 [Source:HGNC Symbol;Acc:HGNC:20067]	29.3333	72.6667	78.6667	0.826302	0.0235979	0.681364	0.0766391	-0.0902507	0.675451
ENSG00000114316	USP4	ubiquitin specific peptidase 4 [Source:HGNC Symbol;Acc:HGNC:12627]	15.3333	20	233	-0.18889	0.6938	3.10448	3.79682e-21	3.33967	4.25435e-44
ENSG00000085982	USP40	ubiquitin specific peptidase 40 [Source:HGNC Symbol;Acc:HGNC:20069]	30.3333	45.3333	296.333	0.0450593	0.900366	2.48331	2.74302e-19	2.50363	3.78233e-43
ENSG00000106346	USP42	ubiquitin specific peptidase 42 [Source:HGNC Symbol;Acc:HGNC:20068]	44	54.3333	326.667	-0.0814092	0.846775	2.2261	1.03937e-09	2.38605	4.28455e-44
ENSG00000154914	USP43	ubiquitin specific peptidase 43 [Source:HGNC Symbol;Acc:HGNC:20072]	9.33333	11	85	-0.169954	0.811981	2.42335	1.07217e-07	2.73977	2.2792e-15
ENSG00000090686	USP48	ubiquitin specific peptidase 48 [Source:HGNC Symbol;Acc:HGNC:18533]	105.333	156.667	866.333	0.142744	0.617028	2.34305	8.4453e-18	2.26045	5.14704e-90
ENSG00000164663	USP49	ubiquitin specific peptidase 49 [Source:HGNC Symbol;Acc:HGNC:20078]	8	8.33333	79.3333	-0.330421	0.676033	2.55275	1.69058e-07	3.0454	4.51761e-15
ENSG00000166348	USP54	ubiquitin specific peptidase 54 [Source:HGNC Symbol;Acc:HGNC:23513]	22.3333	31.6667	160	-0.0637822	0.872798	2.01696	6.38737e-11	2.13376	1.94008e-21
ENSG00000120800	UTP20	UTP20 small subunit processome component [Source:HGNC Symbol;Acc:HGNC:17897]	45.3333	56.3333	470.667	-0.0929575	0.805788	2.67189	1.49492e-17	2.8571	5.36382e-74
ENSG00000163945	UVSSA	UV stimulated scaffold protein A [Source:HGNC Symbol;Acc:HGNC:29304]	13.3333	24.6667	129	0.305467	0.517508	2.43618	5.15353e-11	2.18405	1.00627e-17
ENSG00000103043	VAC14	VAC14 component of PIKFYVE complex [Source:HGNC Symbol;Acc:HGNC:25507]	15.3333	17.3333	123.667	-0.524148	0.319897	2.12131	3.99922e-08	2.62875	2.37594e-20
ENSG00000118640	VAMP8	vesicle associated membrane protein 8 [Source:HGNC Symbol;Acc:HGNC:12647]	2.33333	28.6667	16	3.08652	1.8508e-05	1.98407	0.0191371	-1.05214	0.0079897
ENSG00000162738	VANGL2	VANGL planar cell polarity protein 2 [Source:HGNC Symbol;Acc:HGNC:15511]	24	67.6667	19.3333	0.917195	0.0109322	-1.16409	0.0122013	-2.01673	1.65309e-10
ENSG00000258301	VASH1-AS1	VASH1 antisense RNA 1 [Source:HGNC Symbol;Acc:HGNC:53215]	10	12.3333	208.667	-0.276179	0.63335	3.54768	3.27825e-19	3.86958	9.23284e-39
ENSG00000160293	VAV2	vav guanine nucleotide exchange factor 2 [Source:HGNC Symbol;Acc:HGNC:12658]	38	64.3333	342.667	0.152085	0.66323	2.31835	1.00333e-16	2.20472	4.07934e-43
ENSG00000038427	VCAN	versican [Source:HGNC Symbol;Acc:HGNC:2464]	9.33333	40	87.6667	1.61769	0.0029454	2.4712	1.90829e-07	0.932399	0.000315007
ENSG00000150630	VEGFC	vascular endothelial growth factor C [Source:HGNC Symbol;Acc:HGNC:12682]	1.33333	10.3333	7	2.40068	0.0202168	1.57359	0.157078	-0.772061	0.218896
ENSG00000147852	VLDLR	very low density lipoprotein receptor [Source:HGNC Symbol;Acc:HGNC:12698]	4	17	48.6667	1.61242	0.0294383	2.81579	3.50245e-06	1.31256	0.000138984
ENSG00000197969	VPS13A	vacuolar protein sorting 13 homolog A [Source:HGNC Symbol;Acc:HGNC:1908]	35.6667	52.6667	955.333	0.00937133	0.979289	3.93799	1.30312e-57	3.98056	3.7431e-146
ENSG00000132549	VPS13B	vacuolar protein sorting 13 homolog B [Source:HGNC Symbol;Acc:HGNC:2183]	11.3333	14.6667	186.667	0.0197191	0.976636	3.31972	2.06952e-13	3.46478	6.50799e-35
ENSG00000129003	VPS13C	vacuolar protein sorting 13 homolog C [Source:HGNC Symbol;Acc:HGNC:23594]	42	48	366.667	-0.0936329	0.845881	2.52416	6.12378e-10	2.72628	3.58808e-57
ENSG00000104142	VPS18	VPS18 core subunit of CORVET and HOPS complexes [Source:HGNC Symbol;Acc:HGNC:15972]	20	31.3333	204.667	-0.0165724	0.969868	2.48239	3.20262e-14	2.50396	1.01904e-31
ENSG00000166887	VPS39	VPS39 subunit of HOPS complex [Source:HGNC Symbol;Acc:HGNC:20593]	34.3333	46	259.333	-0.103576	0.780278	2.12776	1.59912e-13	2.29079	1.10018e-30
ENSG00000156931	VPS8	VPS8 subunit of CORVET complex [Source:HGNC Symbol;Acc:HGNC:29122]	25	34	262.333	-0.00120575	0.997793	2.64712	1.00898e-14	2.74244	3.92366e-41
ENSG00000146530	VWDE	von Willebrand factor D and EGF domains [Source:HGNC Symbol;Acc:HGNC:21897]	2.66667	14	173.667	1.88482	0.0213068	5.21973	4.66769e-19	3.43068	4.84962e-34
ENSG00000172661	WASHC2C	WASH complex subunit 2C [Source:HGNC Symbol;Acc:HGNC:23414]	76.6667	80	724	-0.41731	0.156675	2.49399	2.40531e-22	2.97297	1.10837e-107
ENSG00000136051	WASHC4	WASH complex subunit 4 [Source:HGNC Symbol;Acc:HGNC:29174]	48.6667	56.3333	431.333	-0.464421	0.183886	2.25138	2.93016e-16	2.73167	7.61445e-62
ENSG00000163625	WDFY3	WD repeat and FYVE domain containing 3 [Source:HGNC Symbol;Acc:HGNC:20751]	19	24.6667	209.667	-0.267008	0.608487	2.61065	6.51277e-13	2.8877	6.21501e-32
ENSG00000150627	WDR17	WD repeat domain 17 [Source:HGNC Symbol;Acc:HGNC:16661]	11	20	107	0.250605	0.630979	2.43636	5.56455e-10	2.2157	5.95224e-16
ENSG00000157796	WDR19	WD repeat domain 19 [Source:HGNC Symbol;Acc:HGNC:18340]	28	29	235.333	-0.704503	0.129632	2.15437	5.97975e-11	2.81936	3.73432e-35
ENSG00000118965	WDR35	WD repeat domain 35 [Source:HGNC Symbol;Acc:HGNC:29250]	25.6667	40.6667	252.667	0.179523	0.645511	2.53148	4.07646e-15	2.43074	6.04247e-35
ENSG00000047056	WDR37	WD repeat domain 37 [Source:HGNC Symbol;Acc:HGNC:31406]	21.3333	28	239.333	-0.212641	0.61115	2.64354	3.23611e-18	2.89194	2.92637e-41
ENSG00000085433	WDR47	WD repeat domain 47 [Source:HGNC Symbol;Acc:HGNC:29141]	18	22	134.333	-0.302338	0.505112	2.0528	1.34466e-09	2.40097	4.5671e-21
ENSG00000103091	WDR59	WD repeat domain 59 [Source:HGNC Symbol;Acc:HGNC:25706]	60.6667	73	506	-0.1581	0.637816	2.34607	1.29285e-15	2.58332	3.97758e-68
ENSG00000178252	WDR6	WD repeat domain 6 [Source:HGNC Symbol;Acc:HGNC:12758]	177.333	196.667	1245.33	-0.423311	0.0568506	1.99963	2.74649e-25	2.45815	1.16634e-113
ENSG00000140395	WDR61	WD repeat domain 61 [Source:HGNC Symbol;Acc:HGNC:30300]	90	195.667	102.667	0.608287	0.0118749	-0.567829	0.0471617	-1.13151	1.02289e-11
ENSG00000075702	WDR62	WD repeat domain 62 [Source:HGNC Symbol;Acc:HGNC:24502]	43.6667	88	569	0.6412	0.110484	3.0261	2.72168e-18	2.48313	2.81604e-71
ENSG00000167716	WDR81	WD repeat domain 81 [Source:HGNC Symbol;Acc:HGNC:26600]	19.3333	27.3333	371.333	-0.0468588	0.911363	3.44805	8.18248e-32	3.55846	1.28014e-69
ENSG00000161996	WDR90	WD repeat domain 90 [Source:HGNC Symbol;Acc:HGNC:26960]	32.6667	44.3333	417.667	0.0167869	0.968105	2.95458	6.41165e-19	3.03165	1.483e-70
ENSG00000095397	WHRN	whirlin [Source:HGNC Symbol;Acc:HGNC:16361]	11.6667	20.3333	123.667	0.257497	0.620724	2.58941	1.31237e-11	2.39767	4.47704e-19
ENSG00000165238	WNK2	WNK lysine deficient protein kinase 2 [Source:HGNC Symbol;Acc:HGNC:14542]	31	46.3333	675.333	0.0279382	0.939572	3.63695	1.04789e-43	3.66201	5.68638e-115
ENSG00000165392	WRN	WRN RecQ like helicase [Source:HGNC Symbol;Acc:HGNC:12791]	23.6667	31.6667	347	-0.0156956	0.97276	3.11677	1.00966e-19	3.2443	2.45881e-60
ENSG00000198373	WWP2	WW domain containing E3 ubiquitin protein ligase 2 [Source:HGNC Symbol;Acc:HGNC:16804]	32.3333	33	165.333	-0.53097	0.169409	1.53766	1.17391e-07	2.12055	1.92145e-21
ENSG00000132953	XPO4	exportin 4 [Source:HGNC Symbol;Acc:HGNC:17796]	28	35.3333	178.333	-0.236034	0.533126	1.83951	1.02999e-09	2.12898	7.55379e-24
ENSG00000143324	XPR1	xenotropic and polytropic retrovirus receptor 1 [Source:HGNC Symbol;Acc:HGNC:12827]	42.6667	97.3333	45	0.716762	0.0276378	-0.641818	0.0919188	-1.31803	7.56003e-09
ENSG00000126215	XRCC3	X-ray repair cross complementing 3 [Source:HGNC Symbol;Acc:HGNC:12830]	32	46.3333	263.667	0.0564329	0.89063	2.28774	2.33893e-13	2.30859	6.50936e-33
ENSG00000015532	XYLT2	xylosyltransferase 2 [Source:HGNC Symbol;Acc:HGNC:15517]	43	60.3333	470.667	0.0185902	0.958388	2.70304	2.11529e-20	2.75777	9.11823e-67
ENSG00000134684	YARS1	tyrosyl-tRNA synthetase 1 [Source:HGNC Symbol;Acc:HGNC:12840]	519	1056.67	2394.67	0.65986	0.00955624	1.6023	7.85711e-08	0.976348	3.44729e-40
ENSG00000163872	YEATS2	YEATS domain containing 2 [Source:HGNC Symbol;Acc:HGNC:25489]	52	57.6667	586	-0.299805	0.389341	2.75476	6.45847e-23	3.13722	4.19954e-90
ENSG00000047188	YTHDC2	YTH domain containing 2 [Source:HGNC Symbol;Acc:HGNC:24721]	62.6667	90	648	0.0332673	0.912924	2.61155	1.82714e-23	2.64059	1.07986e-77
ENSG00000261659	Z92544.1	novel transcript, antisense to FBXL16	4	4.33333	47.3333	-0.474177	0.624629	2.74064	5.87957e-06	3.24329	1.62463e-10
ENSG00000236829	Z97634.1	ribosomal protein L23a (RPL23A) pseudogene	15	24.6667	180.667	0.144815	0.760701	2.75602	2.10102e-14	2.66046	8.19789e-27
ENSG00000184677	ZBTB40	zinc finger and BTB domain containing 40 [Source:HGNC Symbol;Acc:HGNC:29045]	41.3333	44	780	-0.485252	0.187065	3.41522	2.27809e-46	3.94438	9.13244e-133
ENSG00000114853	ZBTB47	zinc finger and BTB domain containing 47 [Source:HGNC Symbol;Acc:HGNC:26955]	23.3333	30.3333	153.333	-0.03317	0.944405	2.00626	5.8439e-07	2.12795	3.29948e-20
ENSG00000168826	ZBTB49	zinc finger and BTB domain containing 49 [Source:HGNC Symbol;Acc:HGNC:19883]	6	6.66667	61.3333	-0.278951	0.733879	2.58326	5.35368e-07	3.0006	9.72465e-13
ENSG00000160685	ZBTB7B	zinc finger and BTB domain containing 7B [Source:HGNC Symbol;Acc:HGNC:18668]	17.6667	35.6667	210.333	0.463371	0.279642	2.74828	6.23223e-18	2.35171	2.15806e-30
ENSG00000122299	ZC3H7A	zinc finger CCCH-type containing 7A [Source:HGNC Symbol;Acc:HGNC:30959]	58	98.3333	526.667	0.31198	0.344096	2.45492	3.86917e-18	2.21653	4.04589e-56
ENSG00000139168	ZCRB1	zinc finger CCHC-type and RNA binding motif containing 1 [Source:HGNC Symbol;Acc:HGNC:29620]	196	280.333	1665.67	-0.187519	0.464812	2.18138	1.35978e-25	2.36566	8.24374e-131
ENSG00000188818	ZDHHC11	zinc finger DHHC-type containing 11 [Source:HGNC Symbol;Acc:HGNC:19158]	4	5	104	-0.0897405	0.929068	3.91115	8.50835e-13	4.17615	2.35666e-21
ENSG00000099904	ZDHHC8	zinc finger DHHC-type palmitoyltransferase 8 [Source:HGNC Symbol;Acc:HGNC:18474]	90.6667	95	855.333	-0.238852	0.551452	2.67442	1.09846e-11	2.9672	2.88772e-118
ENSG00000229043	ZFAND2A-DT	ZFAND2A divergent transcript [Source:HGNC Symbol;Acc:HGNC:41187]	8.66667	30.3333	11.6667	1.17522	0.0272549	-0.487438	0.43687	-1.57945	0.000137222
ENSG00000133858	ZFC3H1	zinc finger C3H1-type containing [Source:HGNC Symbol;Acc:HGNC:28328]	22	43	428.667	0.446029	0.293921	3.49272	3.26383e-29	3.11543	9.16109e-64
ENSG00000181638	ZFP41	ZFP41 zinc finger protein [Source:HGNC Symbol;Acc:HGNC:26786]	10.6667	16.6667	86	0.280211	0.670301	2.29039	1.92071e-06	2.15968	1.18921e-12
ENSG00000072121	ZFYVE26	zinc finger FYVE-type containing 26 [Source:HGNC Symbol;Acc:HGNC:20761]	20.3333	33.6667	414.667	0.193325	0.669575	3.52831	6.73111e-31	3.41292	5.52404e-73
ENSG00000159733	ZFYVE28	zinc finger FYVE-type containing 28 [Source:HGNC Symbol;Acc:HGNC:29334]	9.66667	10.6667	63	-0.259223	0.705367	1.97253	5.59808e-05	2.36056	8.62697e-11
ENSG00000220201	ZGLP1	zinc finger GATA like protein 1 [Source:HGNC Symbol;Acc:HGNC:37245]	4.33333	7	68.6667	0.139019	0.86678	3.16426	6.608e-09	3.0861	2.95489e-14
ENSG00000138658	ZGRF1	zinc finger GRF-type containing 1 [Source:HGNC Symbol;Acc:HGNC:25654]	37.3333	45	423.667	-0.305497	0.399319	2.68008	6.5227e-22	3.03081	5.18174e-69
ENSG00000174306	ZHX3	zinc fingers and homeoboxes 3 [Source:HGNC Symbol;Acc:HGNC:15935]	24.3333	30.6667	335.333	-0.108893	0.816181	3.03326	1.3766e-20	3.24557	1.51474e-57
ENSG00000156925	ZIC3	Zic family member 3 [Source:HGNC Symbol;Acc:HGNC:12874]	28.6667	70.6667	33.3333	0.817279	0.0202898	-0.509796	0.221325	-1.28518	9.12219e-07
ENSG00000121741	ZMYM2	zinc finger MYM-type containing 2 [Source:HGNC Symbol;Acc:HGNC:12989]	30.6667	63.3333	494	0.634271	0.118484	3.30046	1.68661e-22	2.75943	2.9429e-75
ENSG00000163867	ZMYM6	zinc finger MYM-type containing 6 [Source:HGNC Symbol;Acc:HGNC:13050]	22	33.6667	169	0.0119976	0.976355	2.09714	2.95014e-11	2.12224	4.65749e-22
ENSG00000101040	ZMYND8	zinc finger MYND-type containing 8 [Source:HGNC Symbol;Acc:HGNC:9397]	48	74.3333	402.667	0.184724	0.587052	2.33787	1.8471e-15	2.23246	8.63868e-51
ENSG00000103994	ZNF106	zinc finger protein 106 [Source:HGNC Symbol;Acc:HGNC:12886]	65.3333	73.3333	393.333	-0.410303	0.155043	1.75897	2.9893e-13	2.21969	4.6859e-46
ENSG00000172262	ZNF131	zinc finger protein 131 [Source:HGNC Symbol;Acc:HGNC:12915]	44.6667	47.3333	302.667	-0.419678	0.20865	1.97652	3.06945e-13	2.46822	2.15963e-43
ENSG00000125846	ZNF133	zinc finger protein 133 [Source:HGNC Symbol;Acc:HGNC:12917]	24.6667	25.3333	195.333	-0.507662	0.219281	2.17286	4.0115e-13	2.74259	2.27586e-32
ENSG00000115568	ZNF142	zinc finger protein 142 [Source:HGNC Symbol;Acc:HGNC:12927]	34	43	726	-0.172014	0.623274	3.62404	7.77008e-42	3.86946	5.5729e-123
ENSG00000147118	ZNF182	zinc finger protein 182 [Source:HGNC Symbol;Acc:HGNC:13001]	10	16.3333	97.3333	0.246292	0.702948	2.52074	5.594e-07	2.36293	1.47701e-14
ENSG00000166261	ZNF202	zinc finger protein 202 [Source:HGNC Symbol;Acc:HGNC:12994]	21	23.3333	334.667	-0.439141	0.347643	3.17499	1.18055e-25	3.64174	2.62251e-60
ENSG00000171940	ZNF217	zinc finger protein 217 [Source:HGNC Symbol;Acc:HGNC:13009]	19	22.3333	127	-0.302827	0.502323	1.92861	7.88312e-09	2.30226	6.85489e-19
ENSG00000165512	ZNF22	zinc finger protein 22 [Source:HGNC Symbol;Acc:HGNC:13012]	33	103.667	20.6667	1.13434	0.000252236	-1.43588	0.000656468	-2.52666	1.26932e-20
ENSG00000267680	ZNF224	zinc finger protein 224 [Source:HGNC Symbol;Acc:HGNC:13017]	9.66667	15.3333	123	0.164226	0.782756	2.88233	3.43714e-10	2.79283	1.003e-19
ENSG00000130856	ZNF236	zinc finger protein 236 [Source:HGNC Symbol;Acc:HGNC:13028]	10	20	176	0.346984	0.537103	3.27037	1.74124e-15	2.93176	3.7584e-28
ENSG00000198169	ZNF251	zinc finger protein 251 [Source:HGNC Symbol;Acc:HGNC:13045]	9.33333	12	79.3333	-0.219616	0.708569	2.24706	1.44164e-07	2.5171	8.09798e-14
ENSG00000006194	ZNF263	zinc finger protein 263 [Source:HGNC Symbol;Acc:HGNC:13056]	42	44	427.667	-0.712085	0.0767433	2.38346	1.29037e-14	3.07387	2.23048e-72
ENSG00000174652	ZNF266	zinc finger protein 266 [Source:HGNC Symbol;Acc:HGNC:13059]	22	28.3333	367	-0.0812925	0.862013	3.29677	5.26945e-23	3.49067	1.1212e-66
ENSG00000171606	ZNF274	zinc finger protein 274 [Source:HGNC Symbol;Acc:HGNC:13068]	15.6667	29.6667	174.333	0.313921	0.478908	2.6265	4.71694e-14	2.3511	4.99714e-25
ENSG00000158805	ZNF276	zinc finger protein 276 [Source:HGNC Symbol;Acc:HGNC:23330]	24	36.3333	505	0.128833	0.761224	3.61031	4.66452e-36	3.59029	8.45722e-91
ENSG00000162702	ZNF281	zinc finger protein 281 [Source:HGNC Symbol;Acc:HGNC:13075]	43.6667	96.3333	36.6667	0.633724	0.0408485	-1.01534	0.00581302	-1.59611	3.30911e-11
ENSG00000089335	ZNF302	zinc finger protein 302 [Source:HGNC Symbol;Acc:HGNC:13848]	8.33333	26	20	1.13714	0.0379674	0.475963	0.405659	-0.585884	0.134175
ENSG00000205903	ZNF316	zinc finger protein 316 [Source:HGNC Symbol;Acc:HGNC:13843]	56	62.3333	667	-0.413615	0.167695	2.75054	3.03991e-33	3.21314	9.62532e-106
ENSG00000171467	ZNF318	zinc finger protein 318 [Source:HGNC Symbol;Acc:HGNC:13578]	26.6667	34	374.333	-0.146803	0.707925	3.02047	3.21783e-24	3.25058	9.39576e-64
ENSG00000162664	ZNF326	zinc finger protein 326 [Source:HGNC Symbol;Acc:HGNC:14104]	50	109.667	277.667	0.617109	0.0357281	1.69691	1.99497e-10	1.13908	1.46524e-13
ENSG00000198026	ZNF335	zinc finger protein 335 [Source:HGNC Symbol;Acc:HGNC:15807]	23.6667	25.3333	332.333	-0.626488	0.167569	2.90632	1.31715e-19	3.50799	7.49906e-63
ENSG00000175213	ZNF408	zinc finger protein 408 [Source:HGNC Symbol;Acc:HGNC:20041]	26.6667	27	136.667	-0.648785	0.153684	1.4818	1.38969e-05	2.13083	1.90154e-16
ENSG00000171295	ZNF440	zinc finger protein 440 [Source:HGNC Symbol;Acc:HGNC:20874]	3.33333	3.66667	44.6667	-0.262709	0.809417	2.9688	5.66673e-06	3.3974	4.51193e-10
ENSG00000185219	ZNF445	zinc finger protein 445 [Source:HGNC Symbol;Acc:HGNC:21018]	25.3333	38.6667	213.333	0.0655463	0.861753	2.26096	5.97936e-15	2.25949	1.73328e-29
ENSG00000124459	ZNF45	zinc finger protein 45 [Source:HGNC Symbol;Acc:HGNC:13111]	6.33333	9	62	0.078155	0.919652	2.52558	1.73405e-06	2.58049	4.75003e-11
ENSG00000148143	ZNF462	zinc finger protein 462 [Source:HGNC Symbol;Acc:HGNC:21684]	14.3333	33.3333	168	0.710583	0.132196	2.7513	9.15932e-14	2.12391	1.52313e-21
ENSG00000103199	ZNF500	zinc finger protein 500 [Source:HGNC Symbol;Acc:HGNC:23716]	31	39.3333	226.667	-0.0380517	0.932371	2.16427	9.43865e-10	2.31807	2.38331e-30
ENSG00000196700	ZNF512B	zinc finger protein 512B [Source:HGNC Symbol;Acc:HGNC:29212]	58.3333	81.3333	624.333	-0.000804976	0.997869	2.65996	2.5573e-25	2.7351	5.24575e-88
ENSG00000144026	ZNF514	zinc finger protein 514 [Source:HGNC Symbol;Acc:HGNC:25894]	10.3333	17.3333	98.6667	0.236177	0.709925	2.47476	1.40874e-08	2.30774	8.65978e-14
ENSG00000186020	ZNF529	zinc finger protein 529 [Source:HGNC Symbol;Acc:HGNC:29328]	3.33333	21	25	2.13263	0.003477	2.12311	0.00308274	0.053946	0.887932
ENSG00000183647	ZNF530	zinc finger protein 530 [Source:HGNC Symbol;Acc:HGNC:29297]	6	7.33333	41	-0.364063	0.625372	1.91202	0.000388151	2.28078	2.27779e-07
ENSG00000074657	ZNF532	zinc finger protein 532 [Source:HGNC Symbol;Acc:HGNC:30940]	6	11.3333	64.3333	0.337536	0.623227	2.58868	2.96991e-07	2.299	1.43619e-10
ENSG00000251369	ZNF550	zinc finger protein 550 [Source:HGNC Symbol;Acc:HGNC:28643]	4.66667	8	94	0.339866	0.678796	3.54443	7.87751e-12	3.34852	1.52706e-19
ENSG00000172000	ZNF556	zinc finger protein 556 [Source:HGNC Symbol;Acc:HGNC:25669]	4.33333	0	0.666667	-5.20462	0.000955309	-3.59511	0.00986421
ENSG00000186017	ZNF566	zinc finger protein 566 [Source:HGNC Symbol;Acc:HGNC:25919]	7	21.6667	10.3333	1.09947	0.0519145	-0.235431	0.732779	-1.26923	0.00700717
ENSG00000198453	ZNF568	zinc finger protein 568 [Source:HGNC Symbol;Acc:HGNC:25392]	2	10.3333	15.6667	1.86039	0.0407208	2.17803	0.0115533	0.394351	0.437715
ENSG00000168916	ZNF608	zinc finger protein 608 [Source:HGNC Symbol;Acc:HGNC:29238]	7.66667	15.6667	80	0.299835	0.657181	2.49874	3.35252e-07	2.15279	6.42743e-11
ENSG00000177873	ZNF619	zinc finger protein 619 [Source:HGNC Symbol;Acc:HGNC:26910]	2	12.6667	3.66667	2.10776	0.0231907	0.105278	0.92833	-1.98794	0.00524097
ENSG00000075292	ZNF638	zinc finger protein 638 [Source:HGNC Symbol;Acc:HGNC:17894]	72.3333	96	739.667	-0.0689576	0.809279	2.60122	1.31336e-24	2.73811	2.2977e-97
ENSG00000167395	ZNF646	zinc finger protein 646 [Source:HGNC Symbol;Acc:HGNC:29004]	20.3333	22.6667	251	-0.328254	0.471197	2.83389	4.58505e-20	3.26305	6.3602e-47
ENSG00000147789	ZNF7	zinc finger protein 7 [Source:HGNC Symbol;Acc:HGNC:13139]	25	34.3333	241.333	-0.148724	0.72667	2.44027	3.82808e-16	2.61178	1.85529e-33
ENSG00000181135	ZNF707	zinc finger protein 707 [Source:HGNC Symbol;Acc:HGNC:27815]	5.33333	5.66667	39.3333	-0.779835	0.341059	1.8895	0.00178376	2.58746	7.05021e-08
ENSG00000185252	ZNF74	zinc finger protein 74 [Source:HGNC Symbol;Acc:HGNC:13144]	52	61.6667	378	-0.214458	0.552704	2.12269	3.05971e-12	2.41149	8.27058e-49
ENSG00000162086	ZNF75A	zinc finger protein 75a [Source:HGNC Symbol;Acc:HGNC:13146]	18.3333	27.6667	143.333	0.199852	0.70443	2.25342	3.08024e-08	2.16561	2.23924e-19
ENSG00000196453	ZNF777	zinc finger protein 777 [Source:HGNC Symbol;Acc:HGNC:22213]	59.3333	106.667	559	0.502127	0.198887	2.62623	6.47173e-12	2.18203	9.27508e-55
ENSG00000204946	ZNF783	zinc finger family member 783 [Source:HGNC Symbol;Acc:HGNC:27222]	14.6667	28	194.667	0.395257	0.379476	2.91483	1.40294e-17	2.59002	3.16931e-31
ENSG00000197362	ZNF786	zinc finger protein 786 [Source:HGNC Symbol;Acc:HGNC:21806]	11.6667	25.6667	145	0.71479	0.200194	2.89575	7.7953e-12	2.29643	2.51473e-21
ENSG00000170396	ZNF804A	zinc finger protein 804A [Source:HGNC Symbol;Acc:HGNC:21711]	3.66667	20.3333	14.3333	1.91821	0.00496361	1.12612	0.125992	-0.710256	0.10087
ENSG00000022976	ZNF839	zinc finger protein 839 [Source:HGNC Symbol;Acc:HGNC:20345]	21.6667	36.3333	356	0.35928	0.474659	3.31724	5.20739e-20	3.08696	2.05811e-59
ENSG00000236609	ZNF853	zinc finger protein 853 [Source:HGNC Symbol;Acc:HGNC:21767]	6	10.3333	73.3333	0.37219	0.637401	2.85424	5.29475e-08	2.62223	1.80598e-13
ENSG00000124201	ZNFX1	zinc finger NFX1-type containing 1 [Source:HGNC Symbol;Acc:HGNC:29271]	8.33333	18.6667	241.333	0.506826	0.401886	4.0017	5.58806e-22	3.48827	5.41625e-47
ENSG00000169249	ZRSR2	zinc finger CCCH-type, RNA binding motif and serine/arginine rich 2 [Source:HGNC Symbol;Acc:HGNC:23019]	29.3333	38.6667	238.667	-0.0973746	0.803589	2.2491	6.59321e-14	2.42141	1.65209e-34
ENSG00000121903	ZSCAN20	zinc finger and SCAN domain containing 20 [Source:HGNC Symbol;Acc:HGNC:13093]	10.3333	18.3333	126	0.306652	0.581565	2.8025	2.93611e-12	2.57746	3.08845e-21
ENSG00000140265	ZSCAN29	zinc finger and SCAN domain containing 29 [Source:HGNC Symbol;Acc:HGNC:26673]	24.3333	28.6667	188.667	-0.310932	0.456244	2.14978	2.13466e-11	2.51542	3.68439e-29
ENSG00000186814	ZSCAN30	zinc finger and SCAN domain containing 30 [Source:HGNC Symbol;Acc:HGNC:33517]	7.33333	23.3333	37.3333	1.20702	0.0422286	1.59955	0.00322475	0.476236	0.152559
ENSG00000132801	ZSWIM3	zinc finger SWIM-type containing 3 [Source:HGNC Symbol;Acc:HGNC:16157]	9	10.3333	70.3333	-0.26564	0.69366	2.18376	2.21699e-06	2.56038	1.57573e-12
ENSG00000162415	ZSWIM5	zinc finger SWIM-type containing 5 [Source:HGNC Symbol;Acc:HGNC:29299]	4	5.33333	49	-0.158673	0.857099	2.78802	1.50046e-06	2.99321	1.68838e-10
ENSG00000130449	ZSWIM6	zinc finger SWIM-type containing 6 [Source:HGNC Symbol;Acc:HGNC:29316]	23.3333	34	180.333	-0.0740447	0.859875	2.09494	4.74275e-10	2.20489	4.82767e-23
ENSG00000214655	ZSWIM8	zinc finger SWIM-type containing 8 [Source:HGNC Symbol;Acc:HGNC:23528]	63.6667	108	1147.67	0.345486	0.33177	3.488	6.84019e-28	3.20616	4.64102e-152
ENSG00000153975	ZUP1	zinc finger containing ubiquitin peptidase 1 [Source:HGNC Symbol;Acc:HGNC:21224]	35.3333	42.3333	231	-0.176814	0.649212	1.98697	4.85162e-09	2.24498	1.66091e-28
ENSG00000070476	ZXDC	ZXD family zinc finger C [Source:HGNC Symbol;Acc:HGNC:28160]	15	28.6667	288	0.391205	0.438742	3.44898	9.06324e-25	3.12123	1.86175e-44
ENSG00000203995	ZYG11A	zyg-11 family member A, cell cycle regulator [Source:HGNC Symbol;Acc:HGNC:32058]	20	22.6667	129.333	-0.431217	0.333362	1.84085	4.16268e-07	2.31384	5.1107e-18
ENSG00000074755	ZZEF1	zinc finger ZZ-type and EF-hand domain containing 1 [Source:HGNC Symbol;Acc:HGNC:29027]	52.6667	69.3333	716.333	-0.0947057	0.782042	3.00413	1.43961e-31	3.16687	2.84819e-101
