# Supplementary material for: IGF2BP3 is a key regulator for the abundance of t(4;11) fusion mRNA and protein
Source: Research Square preprint supplement (doi:10.21203/rs.3.rs-8602907/v1), 2026-01-21
Supplement: Supplementary file 3 [file e0895fe410b3b49c1e070732.docx]

**Fig. S1: Bloodspot database data for IGF2BP1, IGF2BP2 and IGF2BP3**

The plots retrieved from the database clearly indicate that KMT2A-r leukemia patient samples overexpress mostly IGF3BP3, less IGF2BP2 und display no overexpression of IGF2BP1

**Fig. S2: Analysis of the (cloned) cDNA sequences of MA4, MmA4, A4M a the original mRNA of MYC**

Top: predicted m6A modifications (SCAMP server). Bottom: predicted IGF2BP3 binding sites (RBPscores). From these *in silico* analysis, it was predicted that there are only changes in the regions coding for the AFF1/Af4 or Aff1/af4 portion of MA4 and MmAf4 which seem to change, as the KMT2A/MLL portion remains unchanged. The black marked region is the Flag-tag which is included in the artificial MmA4 construct. The reciprocal A4M fusion mRNA seem to have mostly binding sites in the region coding for KMT2A/MLL protein portion.

**Supplemental Excel data file 1 – RIP enrichment**

**Supplemental Excel data file 2 – Heatmap**

**
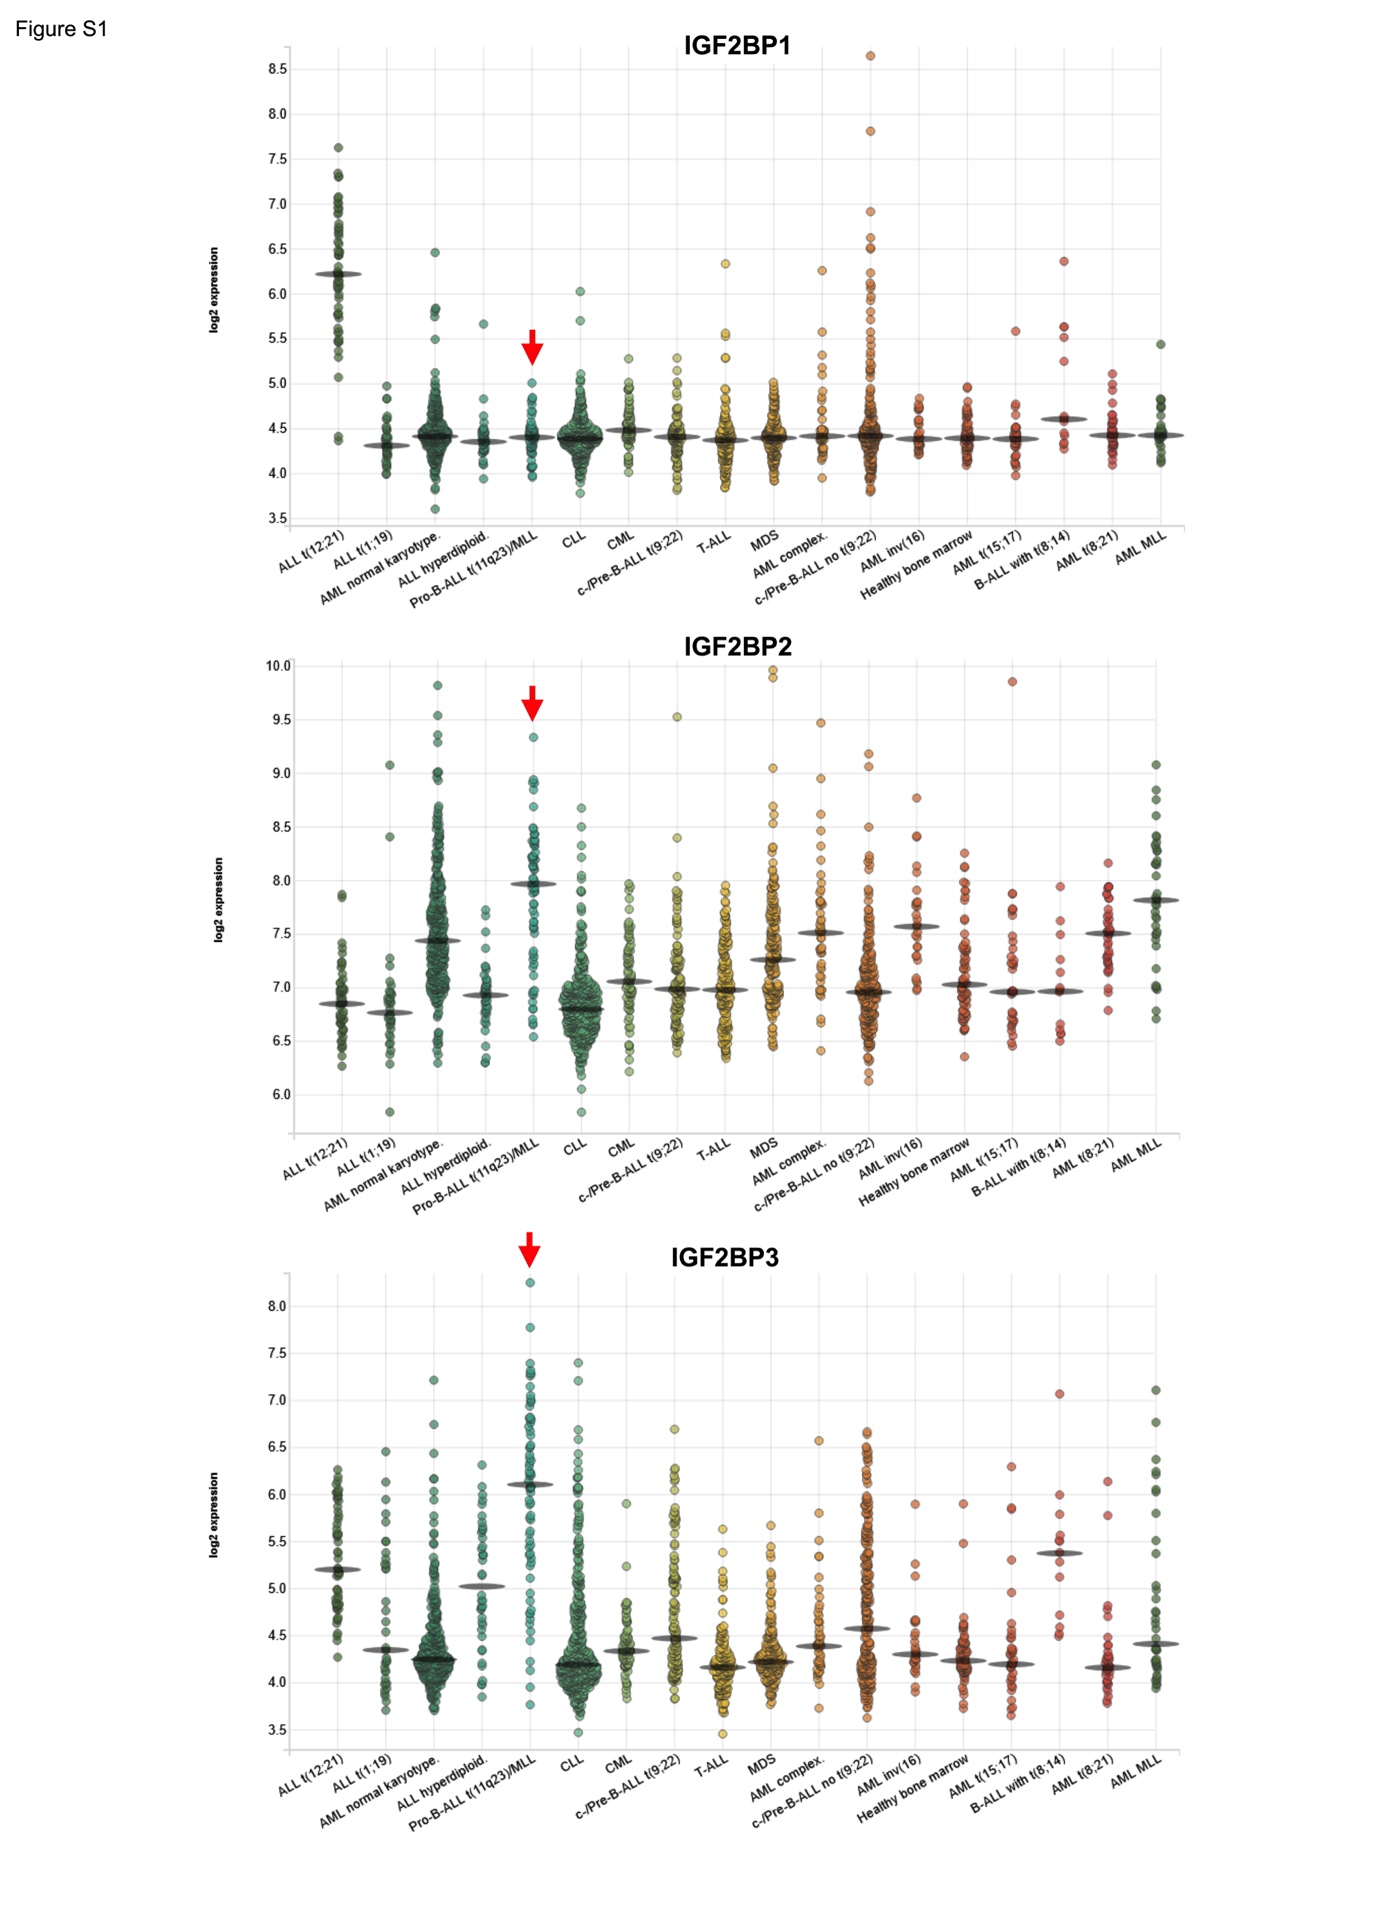
**

**
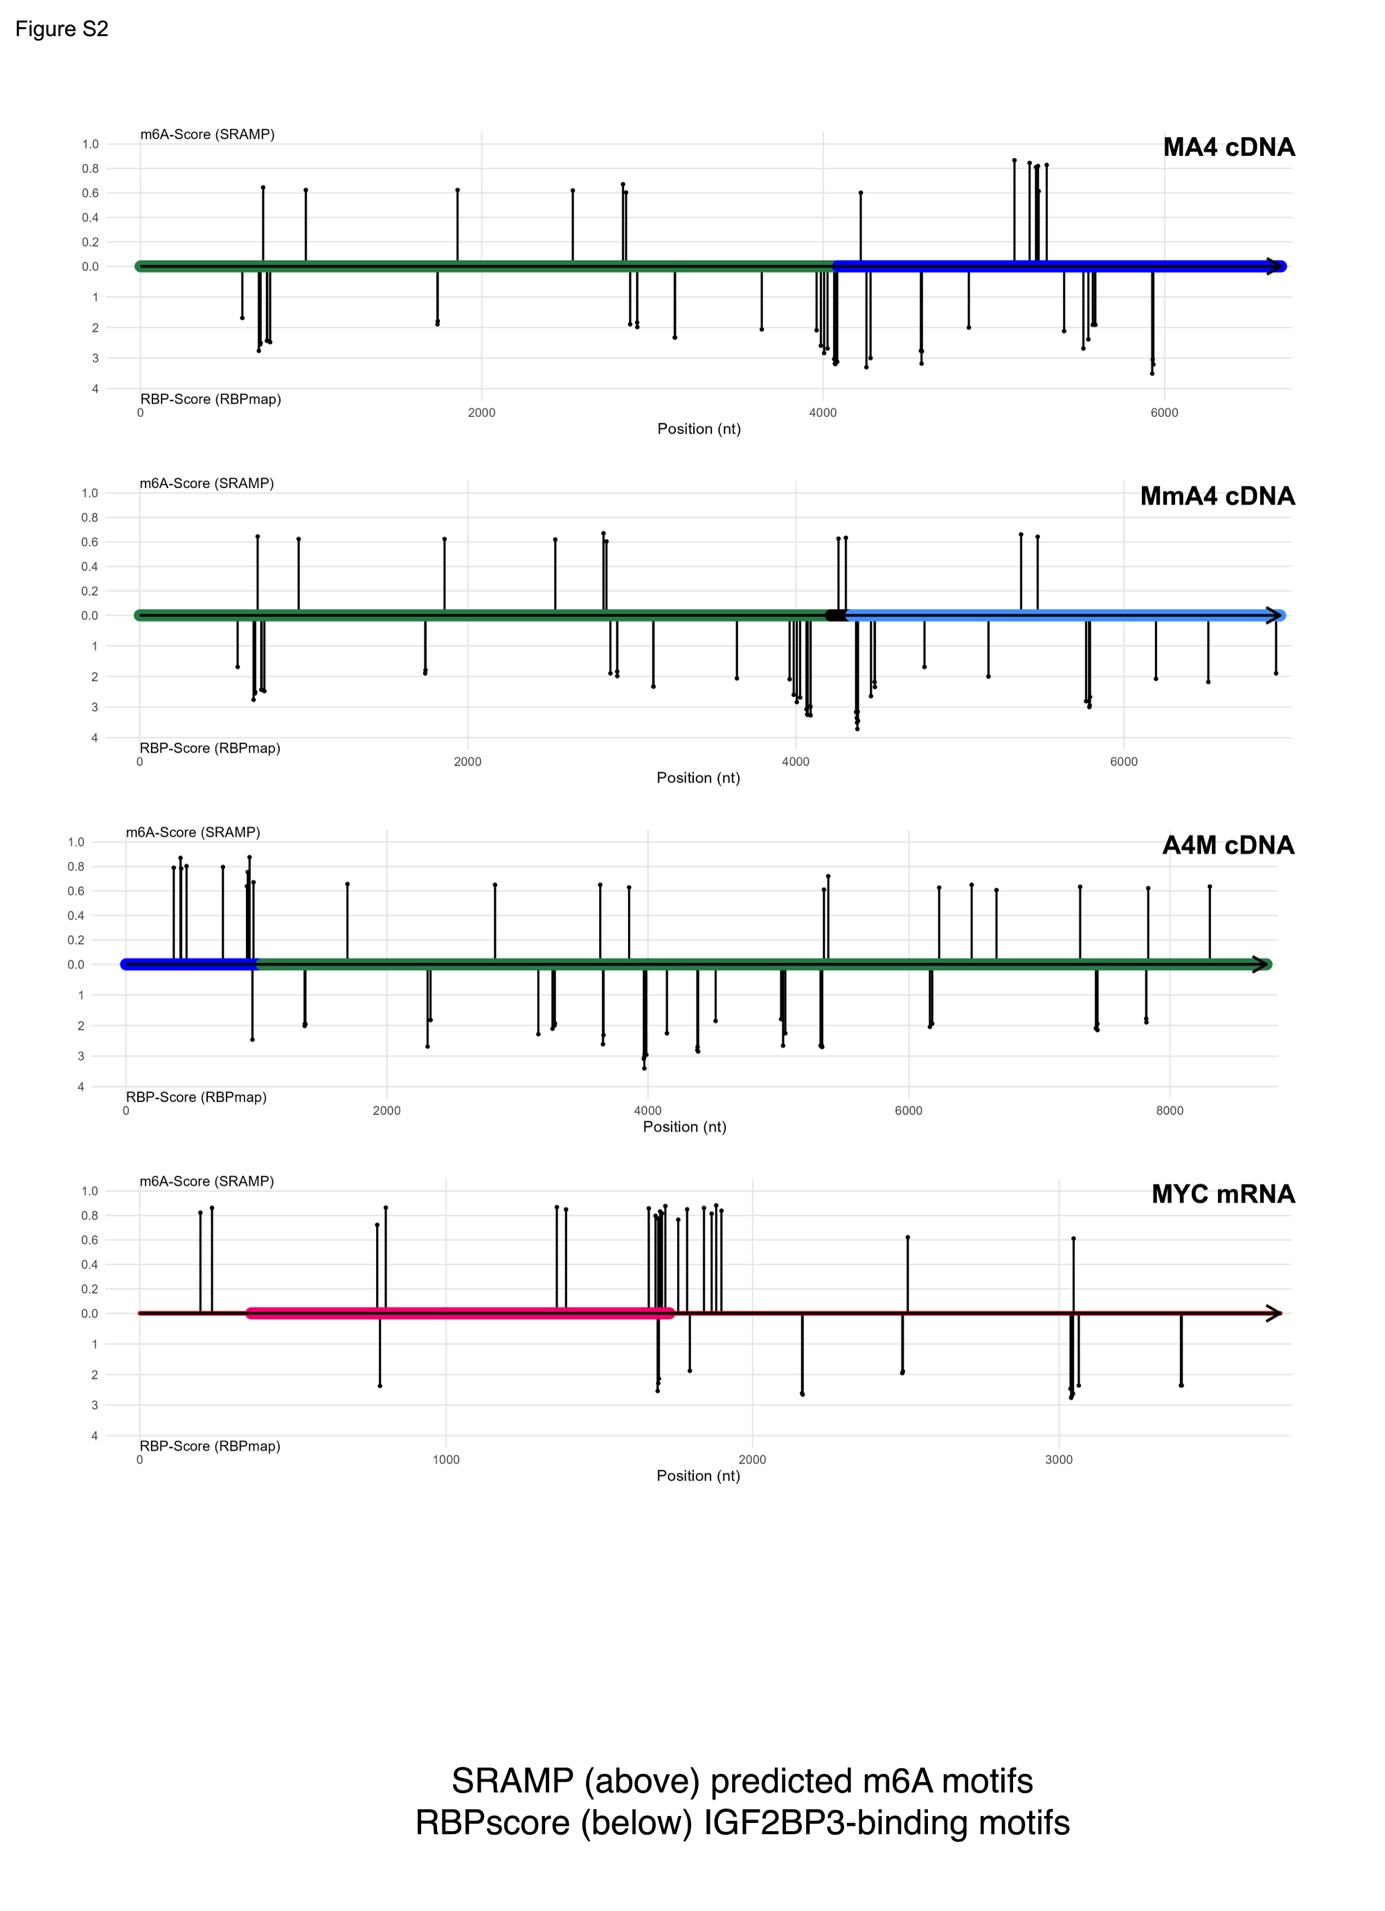
**
